# Supplementary material for: Excess nitrogen responsive HvMADS27 transcription factor controls barley root architecture by regulating abscisic acid level
Source: Front Plant Sci. 2022 Sep 12;13:950796. doi: 10.3389/fpls.2022.950796 (PMC9511987; doi:10.3389/fpls.2022.950796)
Supplement: Supplementary file 2 [file Table_3.xls]

## Sheet: Tabel S3 nowa
gene_id	baseMean	log2FoldChange	lfcSE	stat	pvalue	padj				Table S3. Fold change analysis of genes expressed in WT plant roots in control and N excess stress conditions. Genes are listed according to fold change value.
gene:ENSRNA049480168::chr5H:570856145-570856327	2443.61661957856	-41.4867919352368	5.13452910059528	-8.07996042527581	6.47877948364594e-16	2.16226694322444e-13				gene_id- gene accesion number
gene:ENSRNA050015142::chr7H:621958149-621958331	2388.53356183211	-40.0171877292757	5.1345293328218	-7.79374021168234	6.50542305226223e-15	1.75362852688289e-12				baseMean - the base mean over all rows in tested samples
gene:HORVU1Hr1G092370::chr1H:550484747-550485149	19.2363297325243	-32.1196272432732	5.13960166893709	-6.24943902509	4.11929516511288e-10	3.75550564770015e-08				log2FoldChange - log2 fold change
gene:ENSRNA049478817::chr5H:552228000-552229281	27447.4524461926	-31.0038619374256	5.134525527282	-6.03831099342839	1.55735699996495e-09	1.26428526182483e-07				lfcSE - standard error
gene:ENSRNA050017248::chrUn:201654116-201654320	33558.6797816021	-27.7562063508998	2.50973643420295	-11.0594108499344	1.97389783252889e-28	3.45859798556271e-25				stat - Wald statistic
gene:ENSRNA049487675::chr3H:41101602-41101806	6776.5771088251	-26.2858751782021	2.83130742218529	-9.28400602924066	1.63223491483155e-20	1.14397904397494e-17				pvalue - Wald test p-value
gene:HORVU1Hr1G027090::chr1H:139154627-139155170	15.0538501667644	-23.6522970307293	5.13569850904062	-4.60546836795287	4.11538541856403e-06	0.000132511629112906				padj - BH adjusted p-values
gene:ENSRNA049483986::chr2H:41604757-41604895	2156.53864249777	-9.31868502370675	1.87812092859877	-4.96170660888128	6.98764888168943e-07	2.83633794182243e-05
gene:HORVU6Hr1G081330::chr6H:545547062-545550625	100.811105422995	-9.22637235377309	1.24982429265084	-7.38213555939468	1.55770467538011e-13	3.24280183213289e-11
gene:HORVU6Hr1G005570::chr6H:12363355-12364512	33.9597872285376	-8.91959214576353	1.33390393080336	-6.68683249204582	2.28052656053501e-11	2.70905940462199e-09
gene:HORVU3Hr1G066090::chr3H:503310428-503312717	134.608864042252	-8.75580168975242	0.946380261203915	-9.25188536647408	2.20567186887644e-20	1.44926427234363e-17
gene:HORVU3Hr1G092590::chr3H:638623094-638625437	24.7823307726582	-8.53835175677933	2.67193424362577	-3.19556956805678	0.00139555134640294	0.0144474951302157
gene:HORVU6Hr1G005580::chr6H:12371131-12373090	122.48331124588	-8.4948703217661	1.14111715223939	-7.44434548643433	9.74262275790497e-14	2.13383735528864e-11
gene:HORVU7Hr1G080550::chr7H:477839733-477841225	47.9347902868373	-8.38301107752404	1.14263988546492	-7.33652936866733	2.19203729963051e-13	4.38950250114582e-11
gene:HORVU6Hr1G005600::chr6H:12385615-12387964	102.914888284998	-8.37872637539144	0.886349673750249	-9.45307097585998	3.29032692904525e-21	2.66086207731175e-18
gene:HORVU5Hr1G009600::chr5H:23245644-23247052	49.1367547517144	-8.36425827794759	3.02497082435549	-2.76507072749361	0.00569104549180158	0.0423125610009264
gene:HORVU3Hr1G007900::chr3H:18522902-18528154	10.5008195840189	-8.31535126368725	1.80252366937252	-4.613171746356	3.96570349158858e-06	0.000128281356329448
gene:HORVU5Hr1G051560::chr5H:402828524-402829653	12.6656589404942	-7.81976371263473	1.40475039702217	-5.56665705822989	2.59672734190167e-08	1.58717410147746e-06
gene:HORVU6Hr1G005590::chr6H:12378588-12380695	24.6471560309425	-7.71515194850078	1.47236589709744	-5.23996919767709	1.60603402272195e-07	7.98309015644251e-06
gene:HORVU1Hr1G003040::chr1H:6330367-6332640	13.6406944084999	-7.71512337747332	1.47167861367158	-5.2423968832607	1.58503975708698e-07	7.89740424941018e-06
gene:HORVU2Hr1G080490::chr2H:572514718-572515687	8.46951511835258	-7.57088577197221	1.44639859122619	-5.23430112411404	1.65610275106097e-07	8.17399447037743e-06
gene:ENSRNA049486115::chr6H:329295565-329295950	46.258209376085	-7.49496662435787	2.48612983888157	-3.0147124688104	0.00257222978390631	0.0232818353148575
gene:HORVU4Hr1G028560::chr4H:177864805-177866594	8.86239767690874	-7.39211073081072	1.85152776928984	-3.99243848967277	6.53972998831758e-05	0.00125231660049513
gene:HORVU5Hr1G097870::chr5H:606030787-606033849	23.4992009965197	-7.37975348893228	2.40526865848294	-3.0681618300331	0.00215379946184857	0.0202984255871035
gene:HORVU2Hr1G062750::chr2H:423031718-423032845	28.745400550691	-7.26132237279665	1.27851773729167	-5.67948504819226	1.35100858664562e-08	8.82183433006546e-07
gene:HORVU6Hr1G001520::chr6H:4826278-4832190	19.2487536855138	-7.25327008428635	1.5690274612517	-4.62278083934874	3.7862968951119e-06	0.000123427408552904
gene:HORVU3Hr1G031680::chr3H:158516890-158519111	8.3059145986692	-7.07162774730353	1.74140682230378	-4.0608705884982	4.88900669026023e-05	0.000994161070303788
gene:HORVU5Hr1G087330::chr5H:578455868-578459294	7.34145447805467	-7.070184598673	1.64124145069362	-4.3078272216955	1.64866087105473e-05	0.000414154641275948
gene:HORVU5Hr1G074980::chr5H:545602945-545604262	109.286251411593	-7.00384248278952	0.874502243957539	-8.00894741115105	1.15694364697668e-15	3.63073091363158e-13
gene:HORVU7Hr1G022220::chr7H:32299091-32301272	48.0520443825309	-6.98937582796828	0.899729612484017	-7.7683069791064	7.95421001684176e-15	2.03957585139165e-12
gene:HORVU1Hr1G063340::chr1H:454538805-454540824	29.1275094463881	-6.98520261570036	0.860614651648374	-8.11652764953662	4.79711464593525e-16	1.70956156856669e-13
gene:HORVU5Hr1G039560::chr5H:288099390-288101093	9.77826600688116	-6.83517345832569	1.94250826936585	-3.51873583557876	0.000433608230372067	0.00579964799733021
gene:HORVU2Hr1G011990::chr2H:25486860-25488998	6.11929094142828	-6.81981542723112	1.47553521712848	-4.62192657150067	3.80192596196921e-06	0.000123553779407055
gene:HORVU3Hr1G041130::chr3H:255682410-255682931	9.43660929292571	-6.79885619046671	1.9076802955972	-3.56393899237625	0.00036533089965398	0.00506478240017773
gene:HORVU3Hr1G049780::chr3H:351936507-351937795	7.47001880755967	-6.68326242386425	1.48786715148194	-4.49184083216542	7.06101878684059e-06	0.000207643330086867
gene:HORVU6Hr1G071160::chr6H:495626158-495628482	27.2265372212985	-6.66209706535776	0.90724267583423	-7.34323598615091	2.08490443285132e-13	4.21511544280114e-11
gene:HORVU1Hr1G020430::chr1H:80487031-80488367	6.16050912742867	-6.64589291877018	1.71352288395932	-3.87849673966068	0.000105103935075012	0.00184254055836422
gene:HORVU7Hr1G037350::chr7H:89501305-89505294	8.41225308055614	-6.61576842752415	1.35691864036937	-4.87558224251621	1.08487984774433e-06	4.14739703248589e-05
gene:HORVU4Hr1G075550::chr4H:598754028-598757520	7.72173847461437	-6.61492877060627	1.48974583289198	-4.44030694669907	8.98306585105908e-06	0.000253527439710562
gene:HORVU2Hr1G117540::chr2H:740252469-740257026	24.8580311952339	-6.57484072072189	1.01086311319238	-6.50418502259725	7.81157046246588e-11	8.33736449460953e-09
gene:HORVU4Hr1G077790::chr4H:605486887-605488575	8.69590567785009	-6.5400611071013	1.91229286302652	-3.42001020531477	0.000626187865275677	0.00779527889596589
gene:HORVU3Hr1G043690::chr3H:281902897-281905169	9.72837546597552	-6.52743523923833	1.96348262411074	-3.32441711430708	0.000886035666235012	0.0102416232224203
gene:HORVU4Hr1G051730::chr4H:426728337-426729547	16.6727558974853	-6.52560284573153	1.31283199826667	-4.97063055619246	6.67355058236366e-07	2.71408267978295e-05
gene:HORVU4Hr1G028580::chr4H:177907089-177907930	5.07756873248729	-6.48752098086815	1.92695325908758	-3.36672462099056	0.000760666057778954	0.00910288248768372
gene:HORVU7Hr1G115420::chr7H:641427444-641428819	4.95481669892505	-6.46962213758139	1.48510364177314	-4.3563438642282	1.32252954332041e-05	0.000344152304181374
gene:HORVU5Hr1G076510::chr5H:551372310-551374490	92.420217193915	-6.44887188400831	0.956809273255012	-6.73997636129676	1.58412401774222e-11	1.99447853874538e-09
gene:HORVU3Hr1G109170::chr3H:677230372-677230939	9.32680424417022	-6.43200981031624	1.29677028347744	-4.9600225207722	7.04850076134109e-07	2.83794205448475e-05
gene:HORVU1Hr1G083270::chr1H:531491319-531495831	6.76907047186072	-6.39278474916426	1.59385698194525	-4.01088982360392	6.04903352917766e-05	0.00117656779819139
gene:HORVU6Hr1G087300::chr6H:563794477-563797660	3.67634583564628	-6.2959954769208	1.54919264139722	-4.06404943367303	4.82286045694062e-05	0.000986434474393321
gene:HORVU0Hr1G007430::chrUn:42224265-42225166	74.992165471086	-6.2649735820699	1.04234191600685	-6.01047841006973	1.84976643248609e-09	1.46766750979066e-07
gene:HORVU4Hr1G089410::chr4H:642261252-642262994	5.64044121807421	-6.20855666623359	2.0682728061442	-3.00180742491508	0.00268381896075677	0.0239923373592142
gene:HORVU3Hr1G026270::chr3H:105717513-105721706	124.517509310583	-6.14807521271465	1.25652829601873	-4.89290629760957	9.93577184415589e-07	3.84732115644976e-05
gene:HORVU1Hr1G071500::chr1H:493370385-493371299	15.5260228210627	-6.14268683401413	1.43788469693591	-4.27203018928014	1.93701344519357e-05	0.000472478476782366
gene:HORVU7Hr1G022480::chr7H:32850561-32857694	9.83859010244169	-6.11568350279583	1.351465073402	-4.5252249748497	6.03312920295735e-06	0.000180188316223553
gene:ENSRNA049486261::chr1H:370671239-370671654	298666.082968816	-6.10122082151716	1.3426451864737	-4.54417956656241	5.51496306894762e-06	0.000167811307507515
gene:HORVU2Hr1G011970::chr2H:25395676-25399133	6.45987293149353	-6.09891651250906	1.95421407653534	-3.12090501534097	0.00180296178149827	0.0177228024393561
gene:HORVU4Hr1G090160::chr4H:644508964-644513423	8.87694437172151	-6.05768542059833	1.87746720960264	-3.22651995710776	0.0012530549310992	0.0132729133407012
gene:ENSRNA049483501::chr2H:328625505-328625920	116363.210422932	-5.98182861181245	1.49070271448766	-4.01275757646174	6.00135373841918e-05	0.00117239992913643
gene:HORVU5Hr1G095580::chr5H:598915630-598917736	12.4152539225771	-5.86981468274806	1.55418060692633	-3.77679058443321	0.000158862193386611	0.00260548867250147
gene:HORVU5Hr1G080430::chr5H:560586709-560588220	16.7452675298281	-5.82755386531018	1.42660788258305	-4.08490233122691	4.40953603314487e-05	0.00091796935280103
gene:HORVU7Hr1G022090::chr7H:31912001-31913466	6.11344328577763	-5.81861125762848	1.5947420789502	-3.64862214048982	0.000263650549644439	0.00391487105953902
gene:HORVU3Hr1G112060::chr3H:685358245-685359172	13.3514820670761	-5.8153767523068	1.48421939304143	-3.91813823453018	8.92355296538355e-05	0.00159818249276111
gene:HORVU0Hr1G012820::chrUn:73832338-73834423	3.71228122056971	-5.78970550299036	1.79180597744636	-3.2312122941133	0.00123266349326531	0.01309650460303
gene:HORVU6Hr1G035230::chr6H:168239114-168240543	4.74371522165849	-5.74609680250614	1.50402777124524	-3.82047254203873	0.000133196233897156	0.00225671556319226
gene:HORVU4Hr1G014790::chr4H:55117640-55119126	4.62393734799396	-5.73458805643598	1.35630063556325	-4.22810983499577	2.35662749280344e-05	0.000550560551818725
gene:HORVU7Hr1G098550::chr7H:598424105-598497081	9.21218984035428	-5.6723068459521	1.40653072348199	-4.03283536666005	5.51078881714806e-05	0.00109828924564802
gene:HORVU3Hr1G068390::chr3H:518520092-518526760	4.86413930214183	-5.58643702609406	1.91511621820193	-2.917022462135	0.00353390322371881	0.0296503787637318
gene:HORVU1Hr1G082310::chr1H:529532510-529534760	27.9128780752662	-5.43585791818932	1.40385235227067	-3.87210087257187	0.000107901276332814	0.00187964559749276
gene:HORVU2Hr1G117610::chr2H:740413807-740415361	11.2685497072822	-5.42634665793189	1.19861549081696	-4.52717881547932	5.97763561420045e-06	0.000179594906792301
gene:HORVU3Hr1G081000::chr3H:592420666-592422546	4.03788192564421	-5.40925609515633	1.56787082812638	-3.45006488935089	0.000560451821915451	0.00713752877504196
gene:HORVU7Hr1G009140::chr7H:12535844-12537917	5.08693074536854	-5.40018942085669	1.58352746723905	-3.4102278189542	0.000649086355225995	0.00801391057250839
gene:HORVU5Hr1G076430::chr5H:551160458-551162661	50.3276471057074	-5.32992691118673	0.930699502631902	-5.72679677609622	1.02344646620454e-08	6.9192879094587e-07
gene:HORVU6Hr1G092200::chr6H:576926699-576928251	5.12626918857113	-5.3278164186835	1.95527096574425	-2.72484812183335	0.00643310720491108	0.0463227781131714
gene:HORVU7Hr1G115000::chr7H:640639723-640641119	4.09773835629557	-5.30967324236193	1.7220803945346	-3.08328998995247	0.00204725551311624	0.019486461936977
gene:HORVU6Hr1G051860::chr6H:317894527-317899285	57.6513808203477	-5.28841909735848	0.429831253909951	-12.3034773512919	8.67570958277781e-35	2.28019337109358e-31
gene:HORVU5Hr1G065420::chr5H:500706931-500715673	21.7082232454949	-5.21017266392072	1.10203994849951	-4.72775299208949	2.27018115007681e-06	7.94223441955324e-05
gene:HORVU0Hr1G024390::chrUn:127055759-127056524	3.34820322199991	-5.13480876454522	1.5598719496357	-3.29181428369452	0.000995433231473908	0.0110975499071953
gene:HORVU7Hr1G046380::chr7H:151075163-151076370	3.59132997223039	-5.11197289350747	1.69376005196262	-3.01812106595858	0.00254347271526332	0.0230712067778803
gene:HORVU5Hr1G106020::chr5H:623130470-623131149	164.65678350745	-5.10962664700928	1.15155174584272	-4.43716634137877	9.11508552446797e-06	0.000256908563320997
gene:ENSRNA050017835::chr5H:527299683-527301194	745488.12799098	-5.06888741824788	0.615001279330201	-8.24207621774123	1.69247690938549e-16	6.5900036105073e-14
gene:HORVU3Hr1G006040::chr3H:15003544-15008744	124.965112259355	-5.06606516655997	0.391522083714004	-12.9394110250511	2.69689073313784e-38	8.10068922213659e-35
gene:HORVU3Hr1G062940::chr3H:481331163-481337650	13.0567475845148	-5.0203814865741	1.22144224372779	-4.11020784024311	3.95303149074629e-05	0.000838712816593658
gene:HORVU6Hr1G090420::chr6H:572469850-572470900	3.51453048852066	-5.00806417251857	1.74997445270609	-2.86179273347351	0.0042125228888721	0.0336393871103018
gene:HORVU3Hr1G109180::chr3H:677235425-677237361	6.44086099833346	-4.95083524061429	1.41141547121143	-3.50770934681972	0.000451982574426306	0.00601099659069419
gene:ENSRNA049482232::chr2H:751796638-751797024	227.572236459054	-4.94482427631301	1.47692805760084	-3.34804681302182	0.000813832631487164	0.00956492169348748
gene:HORVU3Hr1G117370::chr3H:697988691-697990107	96.0107745048191	-4.85800090980884	1.39693076187766	-3.47762469149083	0.000505877697613832	0.00656448336926435
gene:HORVU2Hr1G014870::chr2H:32644024-32644970	7.01991877917011	-4.8378268478711	1.43288104564783	-3.37629342126153	0.000734695207359582	0.00884748077316298
gene:HORVU5Hr1G116980::chr5H:649716962-649719895	4.05477537607038	-4.78858318922453	1.39657917980063	-3.42879462796241	0.000606268100210477	0.00759677775627264
gene:HORVU1Hr1G063440::chr1H:455495850-455497377	8.43371371441771	-4.7541509595707	1.13548750937224	-4.1868808950607	2.82814137771341e-05	0.000642052819439651
gene:HORVU2Hr1G081640::chr2H:592051983-592052847	7.3473282879808	-4.73013135161042	1.18003418221247	-4.00846977393637	6.11134588980514e-05	0.00118649269325063
gene:HORVU7Hr1G030380::chr7H:60235665-60238632	20.6146111867005	-4.7115987948535	0.885569540228645	-5.32041650126879	1.03529957771821e-07	5.42848102770649e-06
gene:HORVU1Hr1G083740::chr1H:532413879-532415420	34.9501885376401	-4.69137444668675	0.832912260196313	-5.63249536701623	1.77620618641479e-08	1.12489491793847e-06
gene:HORVU5Hr1G088260::chr5H:581237622-581239806	24.0452560297551	-4.69013436934085	1.31509598453013	-3.56638178848716	0.000361943963025296	0.00503988991163568
gene:HORVU0Hr1G005010::chrUn:28695606-28696525	3.36423857897444	-4.63210781498887	1.53352441838512	-3.0205634546509	0.0025230483485673	0.0229354148625058
gene:HORVU3Hr1G034160::chr3H:184599163-184600215	9.05116002037291	-4.63199813462378	1.22711225708028	-3.77471425934973	0.000160191174643116	0.00261861469028441
gene:HORVU6Hr1G074370::chr6H:513722637-513723536	3.45531946290409	-4.62232978433699	1.59938032140482	-2.89007543889057	0.00385149388011637	0.0314613482219607
gene:HORVU7Hr1G115410::chr7H:641403060-641403977	19.5007089236967	-4.61636116821539	0.969744311422357	-4.76039004698508	1.93219177062474e-06	6.9209990066705e-05
gene:HORVU1Hr1G072160::chr1H:496271618-496278858	7.44789757086932	-4.56845899796278	1.05028083847539	-4.34974992459585	1.36292870308741e-05	0.000352050846573905
gene:HORVU7Hr1G040590::chr7H:110497811-110500986	87.6518281029066	-4.52030299683068	0.813180618898959	-5.55879332558508	2.71646128588057e-08	1.64600331403242e-06
gene:HORVU6Hr1G011860::chr6H:22047192-22047937	10.4582749007434	-4.50838555093639	1.21987176064414	-3.69578647230574	0.000219207152119537	0.00340654070987834
gene:HORVU2Hr1G123160::chr2H:754781503-754786917	12.2839538014153	-4.50667647048362	0.950669458300087	-4.74052935132901	2.13160568580551e-06	7.51999012579641e-05
gene:HORVU0Hr1G009270::chrUn:54601221-54601488	3.43017072726487	-4.49537341474813	1.44739927111631	-3.1058281598284	0.00189746948263895	0.0183537168561833
gene:HORVU6Hr1G009570::chr6H:17086828-17088965	44.0395300070706	-4.4893105322319	0.644796712187081	-6.96236573075046	3.34605458612317e-12	5.1730988035166e-10
gene:HORVU2Hr1G014930::chr2H:32743275-32745801	8.10036940108759	-4.4683368877417	1.46024621038379	-3.05998868955621	0.00221345350346969	0.0207490295871394
gene:HORVU5Hr1G043010::chr5H:328349104-328352375	4.01549212084499	-4.46161350854817	1.36009564329362	-3.28036747308733	0.00103671958124888	0.011472666271231
gene:HORVU5Hr1G124810::chr5H:667433684-667439271	5.60465091567443	-4.4366543871421	1.38824496379316	-3.19587284870794	0.0013940853278189	0.0144394276368079
gene:HORVU1Hr1G067730::chr1H:478859427-478862254	6.19343013740636	-4.43555864280207	1.50217823028393	-2.95275124707651	0.00314955650174585	0.0271070712262416
gene:HORVU1Hr1G051450::chr1H:381267087-381269986	36.5470603682866	-4.43128710369102	0.662652527740962	-6.68719565410495	2.27487653421643e-11	2.70905940462199e-09
gene:HORVU5Hr1G007760::chr5H:16102186-16103084	6.5282964523245	-4.42286230605719	1.39868421947808	-3.16215929547528	0.00156603871799385	0.0158839990759955
gene:HORVU7Hr1G020960::chr7H:28921890-28923278	30.641357522961	-4.40873424194258	1.05088663217521	-4.19525199670399	2.72568378376524e-05	0.000623615095075604
gene:HORVU5Hr1G118950::chr5H:654331058-654340533	24.4313652515482	-4.39121866678137	0.802129874557187	-5.47444847283057	4.38876315344831e-08	2.53511357319791e-06
gene:HORVU2Hr1G066780::chr2H:464302283-464308316	7.45976768828795	-4.37398445609461	1.20001920824681	-3.64492870283706	0.000267465940327386	0.00395203012039607
gene:HORVU7Hr1G041230::chr7H:113706895-113741181	34.4518925794352	-4.33277590090941	0.894761866640291	-4.84237880764677	1.2829388530253e-06	4.7913094713517e-05
gene:HORVU7Hr1G116160::chr7H:642817102-642819275	4.27997082314862	-4.32115028180894	1.50609091136249	-2.86911649835254	0.00411620158799407	0.033109125703582
gene:HORVU7Hr1G030500::chr7H:60593321-60607951	8.64887030622344	-4.30137567341767	1.15277506715296	-3.73132261095903	0.000190477111246185	0.0030226201819338
gene:HORVU2Hr1G103930::chr2H:701315961-701318688	12.0728162427561	-4.28796292436246	0.884387758505963	-4.84851003773087	1.24392237841144e-06	4.67048427294267e-05
gene:HORVU3Hr1G105420::chr3H:668438844-668440701	105.12084313096	-4.2842822933402	1.1673681636555	-3.67003523543455	0.000242517036972427	0.00367904994183424
gene:HORVU3Hr1G013490::chr3H:29891412-29893302	12.5708219994732	-4.2337261499058	0.799624648270499	-5.29464187861503	1.19249874347331e-07	6.13043486070168e-06
gene:HORVU7Hr1G114610::chr7H:639769024-639771627	12.7921849601361	-4.22372644705003	1.09768631113336	-3.84784469316106	0.000119161551965413	0.00205536570272746
gene:HORVU1Hr1G073900::chr1H:505244499-505246396	6.04921790810252	-4.21770618130386	1.24137384265832	-3.39761161091642	0.000679768527018168	0.00829626351370568
gene:HORVU3Hr1G001920::chr3H:3976382-3977874	4.75735565624734	-4.21701193891358	1.34254147243585	-3.1410664217787	0.00168333850598961	0.0168381900223299
gene:HORVU5Hr1G087370::chr5H:578549440-578550184	4.46227133141124	-4.18617653100584	1.50087182642951	-2.78916324318281	0.00528444214908125	0.0400398849104801
gene:HORVU4Hr1G004890::chr4H:10704209-10708712	20.5274309774231	-4.1795691646903	0.887648288818226	-4.70858696776714	2.49439936679055e-06	8.60882108934705e-05
gene:HORVU3Hr1G083190::chr3H:602252905-602254385	81.9077058841259	-4.13999926614458	0.629803285024856	-6.57347994934829	4.91526951275984e-11	5.43939246185729e-09
gene:HORVU7Hr1G122170::chr7H:655503105-655504461	26.7766069484539	-4.12655593133178	1.53338120479948	-2.69114811008227	0.00712065742238797	0.0498896844262344
gene:HORVU5Hr1G087380::chr5H:578550238-578560225	8.69078234868183	-4.06549558433184	1.1531514024691	-3.5255523044302	0.000422600716086312	0.00569432589700837
gene:HORVU2Hr1G091060::chr2H:646941448-646941970	3.63736214009681	-4.0410508764251	1.25697763444077	-3.21489481252621	0.00130492329594204	0.0137118027088842
gene:HORVU7Hr1G119760::chr7H:650168459-650169305	5.50969081799853	-4.03758074763247	1.28618524798377	-3.13919068342744	0.00169415166620829	0.0169084169803651
gene:HORVU3Hr1G002900::chr3H:7530341-7538678	8.39874011119371	-4.00946572226407	1.33633287916839	-3.00034952725192	0.00269669958347035	0.0240665557903428
gene:HORVU4Hr1G078150::chr4H:606660265-606661930	96.2087593836725	-3.99489812515136	0.545026070956895	-7.32973767316776	2.30603671081184e-13	4.57421961146507e-11
gene:HORVU5Hr1G074030::chr5H:541860582-541861614	9.33599452065625	-3.97522522324209	1.01662920022461	-3.91020169631544	9.22190843450285e-05	0.00164740736400898
gene:HORVU5Hr1G049420::chr5H:384014433-384019214	100.494671782168	-3.97095593353637	0.51976952335585	-7.63983988114235	2.17492043389568e-14	5.17669490153608e-12
gene:HORVU3Hr1G051110::chr3H:367967651-367968360	13.6853227887737	-3.94032496577219	1.28611092083041	-3.06375204654046	0.00218579992424111	0.020553184315617
gene:HORVU5Hr1G080450::chr5H:560731225-560732948	28.7184504034734	-3.92568482529465	0.73825078446486	-5.31754914170566	1.05174284506271e-07	5.50098135828071e-06
gene:HORVU1Hr1G004790::chr1H:9935358-9941153	52.5624507665291	-3.92347329243309	0.661995145078355	-5.92674028140901	3.09007111973654e-09	2.3886704177787e-07
gene:HORVU7Hr1G035020::chr7H:75226685-75227676	5.34542148923384	-3.91939591624187	1.22930294927201	-3.18830758403609	0.00143108219353431	0.014735521156343
gene:HORVU5Hr1G080420::chr5H:560569796-560571193	9.98397982416056	-3.90357362300094	1.21873063459023	-3.20298309750244	0.00136011963636501	0.0141643761635516
gene:HORVU7Hr1G120210::chr7H:651027534-651029403	73.9192203252515	-3.89131335769652	0.66742407769987	-5.8303460838678	5.53125373866961e-09	4.05226972506158e-07
gene:HORVU4Hr1G002330::chr4H:4252443-4255591	7.78520256417769	-3.87292666055761	1.04947227463563	-3.69035633828658	0.000223940132316226	0.00346218031035365
gene:HORVU3Hr1G094370::chr3H:645670918-645672373	26.7994454233138	-3.87052267954451	0.89262261384021	-4.33612438171702	1.45016904846281e-05	0.000370039495303143
gene:HORVU7Hr1G020940::chr7H:28905919-28907009	27.8548615721429	-3.84009591215743	0.845126021063634	-4.54381455126003	5.5245265202495e-06	0.000167859385281454
gene:HORVU7Hr1G030480::chr7H:60572975-60573691	4.07680339544515	-3.83385914055637	1.35432570134014	-2.83082506428304	0.00464281065771769	0.0362091012200194
gene:HORVU7Hr1G050680::chr7H:184310257-184315519	18.7383576063956	-3.80084102528247	1.25512033228398	-3.02826822856575	0.0024595966723289	0.022445954701557
gene:HORVU4Hr1G064950::chr4H:543117527-543119714	4.53709864249077	-3.79432199998529	1.21946154304231	-3.11147327411343	0.00186156323775027	0.018162983126189
gene:HORVU2Hr1G119240::chr2H:744727932-744729159	7.54618347025216	-3.78457685205403	0.86763018251245	-4.36197002862993	1.28896530565132e-05	0.000339621359857452
gene:HORVU7Hr1G085200::chr7H:515052239-515054030	8.43608406327533	-3.76030104891743	0.82728405084853	-4.54535663423047	5.48423157115402e-06	0.000167451901648302
gene:HORVU3Hr1G027790::chr3H:120852263-120853783	804.081531143399	-3.75321555944896	0.319920051968403	-11.731729650443	8.76490799745654e-32	1.84290955554521e-28
gene:HORVU5Hr1G009180::chr5H:21234548-21236122	44.1145079058555	-3.75108680808003	0.530920742134338	-7.06524818186684	1.60329184449192e-12	2.59313956325285e-10
gene:HORVU6Hr1G020950::chr6H:61106758-61108080	39.1128760299683	-3.74718567662484	0.65969911031557	-5.68014359581651	1.3458170685838e-08	8.81531142805077e-07
gene:HORVU5Hr1G115870::chr5H:647348228-647349248	15.3678195091908	-3.68880968287849	1.06312290484362	-3.46978666913502	0.000520871894162109	0.00672305245343923
gene:HORVU7Hr1G040860::chr7H:112030369-112031197	22.3527610102581	-3.6667816617806	1.0838937678935	-3.38297144092528	0.000717060885772273	0.00866988049697977
gene:HORVU3Hr1G088270::chr3H:624281925-624283523	50.0893401545486	-3.65481469732522	0.634942527823214	-5.75613466915675	8.60617387177008e-09	5.97205979629828e-07
gene:HORVU2Hr1G021320::chr2H:60580392-60582265	9.79200865246261	-3.65059059072085	0.658076542991414	-5.54736470947041	2.90007402683279e-08	1.74719073032052e-06
gene:HORVU6Hr1G058580::chr6H:383454656-383455886	64.1501190600507	-3.64227983795415	0.623476615128872	-5.84188684799556	5.16128603352881e-09	3.82116901904847e-07
gene:HORVU3Hr1G114700::chr3H:691488110-691491228	13.199799909784	-3.63002463891699	1.12555206838823	-3.22510591990215	0.00125926069816924	0.0133252216606474
gene:HORVU6Hr1G074690::chr6H:515295502-515297209	8.97147707158701	-3.62856946002428	1.26757411708087	-2.86260930317875	0.00420168309704087	0.0335655732516647
gene:HORVU2Hr1G098980::chr2H:685994495-685996639	6.19276756457715	-3.61115809128049	1.05899320411685	-3.40999175182812	0.000649648441737946	0.00801614327228993
gene:HORVU5Hr1G006320::chr5H:10955204-10956629	351.200477131158	-3.57374812076312	0.402320842328454	-8.88283117543663	6.51798448723821e-19	3.70397680618029e-16
gene:HORVU2Hr1G102720::chr2H:697622890-697624179	12.821095347268	-3.56371729866042	1.11363053205866	-3.20008943367646	0.00137384950130104	0.0142861323513133
gene:HORVU5Hr1G119050::chr5H:654560451-654562420	60.797795704399	-3.55159218600235	0.511442899826529	-6.94425944168346	3.80450760756749e-12	5.71382692547957e-10
gene:HORVU7Hr1G035010::chr7H:75223087-75224371	4.9822928342273	-3.54002668137519	0.952794278633457	-3.71541555271771	0.000202870012229674	0.00318561977381713
gene:HORVU3Hr1G065630::chr3H:499654909-499656615	26.0281275141154	-3.53919889905685	0.81627248042474	-4.33580573145778	1.45227165242376e-05	0.000370126833501357
gene:HORVU1Hr1G045700::chr1H:332542054-332544080	11.5080423641023	-3.53577178108534	0.833753078008362	-4.24079007843839	2.22734376036164e-05	0.000529176609100156
gene:HORVU5Hr1G084750::chr5H:573265659-573267415	39.9148117360273	-3.52994473029166	0.779127086155845	-4.53064049885384	5.88051315959015e-06	0.000177652667093887
gene:HORVU4Hr1G064070::chr4H:536981408-536983117	32.2697067261299	-3.52893057320644	0.826187681349159	-4.27134252043521	1.94299711708416e-05	0.000472840941942264
gene:HORVU2Hr1G007720::chr2H:16097355-16099354	65.2398354099351	-3.50403488248519	0.610687958014717	-5.7378483339944	9.58869228825896e-09	6.58367341978822e-07
gene:HORVU5Hr1G072760::chr5H:536495988-536499148	23.1000191086025	-3.49739392821087	0.705157991639477	-4.95973096763678	7.059087294281e-07	2.83794205448475e-05
gene:HORVU4Hr1G078170::chr4H:606694567-606694956	12.9016720409822	-3.48529627220314	0.811356226778955	-4.29564247758299	1.74188119125876e-05	0.000433429513933806
gene:HORVU4Hr1G078220::chr4H:606806988-606807816	31.3518090789341	-3.46972378221435	0.706217241506619	-4.91311111976275	8.96424368471947e-07	3.52303154607311e-05
gene:HORVU1Hr1G090110::chr1H:545364781-545365999	8.26952295305137	-3.46717326328756	1.23088197778687	-2.81682023610546	0.00485016639971776	0.037380333218309
gene:HORVU5Hr1G074010::chr5H:541846377-541847406	10.3710038651661	-3.45652184322763	0.915311975270004	-3.7763319355764	0.000159154862149297	0.00260825419450594
gene:HORVU1Hr1G078710::chr1H:520936396-520940396	59.9958999872444	-3.43784609533551	0.693633153225106	-4.9562886078195	7.18524624728396e-07	2.8776569065789e-05
gene:HORVU5Hr1G114000::chr5H:642965564-642970873	53.2879050949473	-3.42569461765445	0.805701258352245	-4.25181738534256	2.1204273462175e-05	0.000506637561154195
gene:HORVU3Hr1G001400::chr3H:2995483-2997485	36.202751858449	-3.41843426908131	0.595431950215238	-5.74109983155189	9.40636144470793e-09	6.48452969627636e-07
gene:HORVU7Hr1G113030::chr7H:636344220-636345916	11.7128015358847	-3.41566328509114	0.763923140454845	-4.47121327291831	7.77770862542451e-06	0.000224634754887604
gene:HORVU2Hr1G017720::chr2H:44541761-44544834	8.85321226652812	-3.40700863393291	0.994911562978153	-3.42443364889078	0.000616082265711533	0.00770139460098139
gene:HORVU0Hr1G002410::chrUn:10962586-10964226	20.5151744222207	-3.39854744587484	0.88302052423269	-3.84877514464122	0.0001187099100066	0.00204925662380851
gene:HORVU4Hr1G054390::chr4H:453037062-453038107	5.5947732452495	-3.39226573481661	0.969038192850895	-3.50065225482663	0.000464121033611754	0.00614521968055463
gene:HORVU1Hr1G045690::chr1H:332414830-332417109	25.1918442710856	-3.38790621180585	0.993711237308756	-3.40934678466677	0.00065118644651174	0.00802233218982562
gene:HORVU5Hr1G097270::chr5H:603851091-603853212	237.463945673971	-3.37658501198471	0.485331108185419	-6.95728123550386	3.46902025061928e-12	5.2643251662514e-10
gene:HORVU5Hr1G109190::chr5H:629295131-629296380	88.0293863268494	-3.37608366070759	0.571111556667843	-5.91142592246844	3.39158786459584e-09	2.58375095800696e-07
gene:HORVU6Hr1G076520::chr6H:526388209-526390045	11.3802646576929	-3.36826329908653	0.883323686015008	-3.81316990862317	0.000137195724351504	0.00231329374516017
gene:HORVU2Hr1G004440::chr2H:9818845-9819216	12.5362273907756	-3.35341534173877	1.14103741086984	-2.93891796166646	0.00329360241052815	0.0280925638893666
gene:HORVU7Hr1G041300::chr7H:113910701-113914342	27.4459164619497	-3.31439451100985	0.815754204331751	-4.06298183130412	4.84498019995367e-05	0.000989034501788601
gene:HORVU5Hr1G106010::chr5H:623107406-623108808	140.6387702872	-3.30770539672696	0.882775903922777	-3.74693665972142	0.000179007263667287	0.00287313490524304
gene:HORVU3Hr1G109230::chr3H:677377298-677378596	18.7699675816432	-3.2986650587364	0.897380819435059	-3.67588094964304	0.00023703004653643	0.00361931282387435
gene:HORVU7Hr1G083850::chr7H:505351663-505353285	7.52926083774963	-3.29019817070424	1.05960079621607	-3.10512995314257	0.00190195441721548	0.0183779841803183
gene:HORVU7Hr1G024940::chr7H:40927927-40932173	73.807039082965	-3.28662609991389	0.833933170675354	-3.94111448673069	8.11039023180395e-05	0.00148286143490356
gene:HORVU6Hr1G083570::chr6H:552026949-552037142	6.21506457570365	-3.28174065297326	0.942904069098639	-3.48046080245513	0.000500552061486277	0.00650068415368156
gene:HORVU5Hr1G056480::chr5H:442009816-442011216	8.22868130678852	-3.27733998661178	0.684196874357057	-4.7900540172615	1.66736421238857e-06	6.07590986649604e-05
gene:HORVU7Hr1G020900::chr7H:28407500-28409681	5.17899323864218	-3.26189883758674	1.19702470941951	-2.72500543382148	0.00643004288179872	0.0463227781131714
gene:HORVU4Hr1G008640::chr4H:23757746-23759779	6.5618812488903	-3.24950412079185	0.891814685346336	-3.64369882463855	0.000268747872481187	0.00395727573569328
gene:HORVU0Hr1G009230::chrUn:54176336-54179822	10.1950378957568	-3.21932671020648	1.02727878650321	-3.13383937496155	0.00172535273377937	0.0171686069950048
gene:HORVU7Hr1G109080::chr7H:626933714-627017883	7.09302847975087	-3.21475545001443	0.902226987269182	-3.56313377384631	0.000366453813430106	0.0050757957056531
gene:HORVU1Hr1G005510::chr1H:12039436-12043118	29.4428309228136	-3.2127727607116	0.761257286535538	-4.22035075070722	2.43922503334393e-05	0.000566708790619773
gene:HORVU2Hr1G004530::chr2H:10042232-10044248	332.536562542579	-3.20675454781147	1.04083172378735	-3.08095388959015	0.00206338599974065	0.019606841627033
gene:HORVU7Hr1G113850::chr7H:638274709-638276637	29.4824172461457	-3.2057220600465	0.726867071645597	-4.4103278097175	1.03214251554954e-05	0.000283684033097316
gene:HORVU2Hr1G091100::chr2H:647115264-647116389	4.96242575384458	-3.20308240829704	1.14576601105724	-2.79558162607864	0.00518064174251288	0.0394238774079174
gene:HORVU1Hr1G047220::chr1H:348548114-348552175	576.801306205149	-3.2003475130835	0.340005570557036	-9.41263258669654	4.83863128792247e-21	3.63346648070921e-18
gene:HORVU6Hr1G001960::chr6H:5686172-5688315	25.6888115596129	-3.17383315599065	0.625755439585534	-5.07200250323485	3.93651209358591e-07	1.73157119832087e-05
gene:HORVU5Hr1G097120::chr5H:603280395-603281825	33.6550562696856	-3.15770640899637	0.974717444838717	-3.23961208011299	0.00119692415553677	0.0128204418208437
gene:HORVU7Hr1G122430::chr7H:656188439-656195577	11.8316731032086	-3.15455119595497	0.928415383473733	-3.39777997231367	0.000679350348492738	0.00829626351370568
gene:HORVU2Hr1G004540::chr2H:10050663-10055844	214.219852106475	-3.15305123206578	0.950519769909535	-3.31718637726585	0.000909289374789632	0.0104189201059002
gene:HORVU3Hr1G089290::chr3H:628015104-628016247	14.682561128482	-3.14691612456718	0.926465577006383	-3.39668974505838	0.000682062516374475	0.00831536663888646
gene:HORVU5Hr1G109980::chr5H:631560119-631561719	56.4843528333192	-3.1464080250044	0.570363498282916	-5.51649611953901	3.45825121766975e-08	2.04250533996416e-06
gene:HORVU5Hr1G049260::chr5H:382202936-382206811	10.211108632922	-3.10015830252376	1.0525018136665	-2.94551350151505	0.00322419075928685	0.0276250345985189
gene:HORVU1Hr1G077350::chr1H:517101819-517104459	23.4489461241342	-3.09680198926897	0.743582387987624	-4.1647059415298	3.1175411291609e-05	0.000690720967141592
gene:HORVU5Hr1G059100::chr5H:461417863-461419212	28.1097595453979	-3.09116809522999	0.496286981134898	-6.2285899343182	4.70651888169073e-10	4.2471787985592e-08
gene:HORVU2Hr1G017220::chr2H:39910001-39912484	15.9992110375526	-3.09010914173829	0.808642751822986	-3.82135267368936	0.000132721692296852	0.00225230532867927
gene:HORVU6Hr1G077630::chr6H:531539069-531539824	9.69700990926833	-3.08309728212808	1.1071826081525	-2.78463304917035	0.00535883306533658	0.0404432247063054
gene:HORVU4Hr1G078470::chr4H:607622981-607629967	25.253193777588	-3.0783707448884	0.97272676968807	-3.16468184161885	0.00155252614974716	0.0157773875420898
gene:HORVU4Hr1G066170::chr4H:551338298-551340331	11.2381484597326	-3.07396397334099	0.945126964206794	-3.25243495292809	0.00114420781674563	0.0123966065373623
gene:HORVU3Hr1G016940::chr3H:42399001-42400337	19.1698280007568	-3.06931727541522	0.693481530094771	-4.42595388949403	9.60170343915564e-06	0.000268822125847785
gene:HORVU7Hr1G038560::chr7H:98310680-98312174	7.98909763293631	-3.06439353955531	1.11709233247172	-2.74318733597868	0.00608459620097084	0.0444526475752651
gene:HORVU5Hr1G074880::chr5H:545281728-545284095	464606.62762836	-3.06377602215996	0.847747672760389	-3.61401879427621	0.00030148719303106	0.00432405847249049
gene:HORVU5Hr1G084820::chr5H:573348289-573389755	67.5544570389509	-3.04928388282051	0.386373192258163	-7.89206897351996	2.97217376129387e-15	8.80182049365702e-13
gene:HORVU5Hr1G057600::chr5H:451481031-451481718	8.00874929295509	-3.04578073379037	0.833256937985252	-3.65527197547832	0.000256909470381204	0.00385290907577403
gene:HORVU5Hr1G059280::chr5H:463207930-463210666	43.2857729201328	-3.04445240130392	0.560843293730614	-5.42834769593633	5.68781527896459e-08	3.19764716725961e-06
gene:HORVU0Hr1G002390::chrUn:10863098-10865303	71.783416895011	-3.03630796003542	0.575752966982954	-5.27362972343191	1.33751632849595e-07	6.76024478917207e-06
gene:HORVU3Hr1G006410::chr3H:15414667-15423605	11.6475398750415	-3.0163906595379	0.715105906980552	-4.21810340271729	2.46365840614589e-05	0.000570494291273386
gene:HORVU3Hr1G086230::chr3H:616324524-616326392	20.4422119296095	-3.00709376664648	0.722620867661337	-4.16137133761238	3.16342208971712e-05	0.000699412332895817
gene:HORVU2Hr1G100230::chr2H:690130603-690137706	51.7196997483432	-3.00562619278195	0.386179408554643	-7.7829789113592	7.08364451910662e-15	1.8617588707342e-12
gene:HORVU7Hr1G036370::chr7H:84228372-84229694	27.5306720509887	-3.0003428406877	0.70088217013994	-4.28080919805485	1.86214964727521e-05	0.000456335180461638
gene:HORVU2Hr1G102710::chr2H:697575931-697580169	25.9945772960716	-2.99617452412686	0.915065444936322	-3.27427348580009	0.00105934031324665	0.0116799629923042
gene:HORVU7Hr1G096430::chr7H:587966017-587986345	36.876877792275	-2.99477420767587	0.36580541553251	-8.18679571300585	2.68272974562516e-16	1.00726920770562e-13
gene:HORVU1Hr1G084900::chr1H:534540167-534543485	68.4876644838995	-2.98522409344677	0.832882590076112	-3.58420758101568	0.000338103117523601	0.00475197603546205
gene:HORVU4Hr1G051290::chr4H:420307746-420310209	6.06630262019922	-2.98490777925025	1.10012214993979	-2.71325123252325	0.00666265725228237	0.0474878072496574
gene:HORVU1Hr1G067160::chr1H:476758261-476759481	4.04847672187182	-2.97640412010063	1.07292673994405	-2.77409818330731	0.00553549690646695	0.0414826364240698
gene:HORVU6Hr1G015390::chr6H:33718805-33723970	169.860070492857	-2.97551020432405	0.376195955818263	-7.90946887733555	2.58489311511982e-15	7.76428037692991e-13
gene:HORVU7Hr1G001040::chr7H:2257282-2260447	494.088591899742	-2.97322849633106	0.657419798715198	-4.52257218620685	6.10926413093749e-06	0.00018220338669091
gene:HORVU3Hr1G015770::chr3H:37357038-37358505	6.18861037212514	-2.96842828926529	1.06621601341172	-2.78407775903384	0.00536801632267484	0.0404941135496939
gene:HORVU3Hr1G065620::chr3H:499457723-499459848	11.2353363016113	-2.9669381807638	0.946923971416986	-3.13323801099263	0.00172889184903032	0.0171713179110588
gene:HORVU1Hr1G001050::chr1H:2551017-2551329	16.7705202762926	-2.95863948858838	0.722004212947535	-4.09781471566479	4.17068906373447e-05	0.000876053029511299
gene:HORVU5Hr1G118590::chr5H:653395642-653398941	47.9774872433988	-2.95412592098116	0.43631346755732	-6.77065032514283	1.2820479582385e-11	1.65376321287869e-09
gene:HORVU5Hr1G027110::chr5H:154022559-154026952	27.1211169599897	-2.94976297583566	0.35043087981572	-8.41753151830355	3.84499852879122e-17	1.61689878132728e-14
gene:HORVU1Hr1G075760::chr1H:512192801-512200119	79.2353073089174	-2.94881234148372	0.423474085839003	-6.96338321538949	3.32196559613726e-12	5.1730988035166e-10
gene:HORVU4Hr1G082470::chr4H:622330493-622332849	7.26943355827767	-2.94616178218637	0.996030216136941	-2.95790402184075	0.0030973854838691	0.0268117032457109
gene:HORVU1Hr1G054000::chr1H:398665773-398666303	12.1310133993776	-2.94414959540757	0.703596254563475	-4.18443045469901	2.85881948489242e-05	0.000645644881733062
gene:HORVU4Hr1G062650::chr4H:524276090-524277327	15.7113724661257	-2.94297822417023	0.602360793499633	-4.88574000155609	1.03041101453367e-06	3.97249746277448e-05
gene:HORVU2Hr1G118740::chr2H:743214574-743222844	130.524041633755	-2.94140299923131	0.270900886829932	-10.8578566635623	1.82993796182919e-27	2.74830539895862e-24
gene:HORVU3Hr1G105180::chr3H:667716163-667717596	430.514932636904	-2.94018801148212	0.331826018200319	-8.86063132550134	7.95625754722344e-19	4.4023229259979e-16
gene:HORVU3Hr1G002840::chr3H:7464072-7467628	347.571912348146	-2.94005693923375	0.248241923115412	-11.8435149967271	2.32500238581148e-32	5.43172224045246e-29
gene:HORVU3Hr1G069010::chr3H:523304957-523306274	83.0671185409974	-2.93758119046582	0.415663593054399	-7.06720828947212	1.58081588593087e-12	2.57660735020019e-10
gene:HORVU1Hr1G054020::chr1H:398749496-398753454	127.216193397191	-2.93721477678984	0.448323902405643	-6.55154623929075	5.69443496540309e-11	6.26864866924426e-09
gene:HORVU3Hr1G088080::chr3H:623536594-623539669	104.174041193945	-2.93643312876487	0.422092767286137	-6.95684303629458	3.4798229031087e-12	5.2643251662514e-10
gene:HORVU6Hr1G086440::chr6H:561583186-561586737	19.3973657149846	-2.93635326737328	0.885128284902731	-3.31743241907128	0.000908488908362066	0.0104154240933592
gene:HORVU1Hr1G086900::chr1H:538390617-538391311	5.78385567399235	-2.93266033731152	1.06161222613408	-2.76245908356857	0.00573677516840665	0.0425622564188138
gene:HORVU3Hr1G105520::chr3H:668647197-668648892	251.365167170028	-2.92681390453993	0.427881958573219	-6.84023676599839	7.9062399760628e-12	1.0936618535309e-09
gene:HORVU2Hr1G010840::chr2H:21354221-21355960	8.08867973592216	-2.92147109824086	1.00535841208124	-2.9059000881019	0.0036619835791391	0.0304696742124965
gene:HORVU3Hr1G065610::chr3H:499412250-499414431	61.4656138432949	-2.91761652408121	0.478204818106049	-6.10118596386493	1.05284327075483e-09	8.99881406946791e-08
gene:HORVU3Hr1G028860::chr3H:131420707-131422743	14.1760363074733	-2.91087549817262	0.802479952146301	-3.62734980529698	0.000286345241040617	0.0041389679771968
gene:HORVU2Hr1G014300::chr2H:31261168-31262850	3.649133953513	-2.91086388149347	1.01557025331831	-2.86623586303597	0.00415384635488899	0.0333313647351073
gene:HORVU5Hr1G097320::chr5H:604000818-604002150	20.1216535693052	-2.90677556104204	0.671377204793838	-4.32957142465781	1.4939980986568e-05	0.000380300290827578
gene:HORVU2Hr1G089210::chr2H:637968904-637971381	42.5640635144993	-2.90597390444846	0.641404295857873	-4.53064303313052	5.88044261323168e-06	0.000177652667093887
gene:HORVU1Hr1G084620::chr1H:534222636-534223298	9.95562775107738	-2.89339212531912	0.816579195976443	-3.54330864608824	0.000395139951912883	0.00538445406929376
gene:HORVU4Hr1G026770::chr4H:161815170-161817408	29.978187980878	-2.8931673146731	0.549487426658611	-5.26521113006393	1.40028338004063e-07	7.04362639921872e-06
gene:HORVU6Hr1G064430::chr6H:436275550-436279451	13.6264804100554	-2.88928388650285	0.611022045322262	-4.72860825337161	2.26064084377542e-06	7.9345193704859e-05
gene:HORVU1Hr1G022060::chr1H:91840018-91842898	89.7291031380135	-2.8773911286634	0.451980956092395	-6.36617779992305	1.93796771057625e-10	1.89524228291052e-08
gene:HORVU7Hr1G037410::chr7H:89778599-89780563	44.894043119778	-2.87448484113941	0.286918156866791	-10.0184835722124	1.26427789321199e-23	1.32913534913377e-20
gene:HORVU5Hr1G051370::chr5H:401197919-401201539	101.647364125857	-2.87126785306683	0.575946685968513	-4.98530145761408	6.18652784800071e-07	2.53677582907328e-05
gene:HORVU7Hr1G101980::chr7H:610995258-610995996	20.1268936441346	-2.86508508772742	0.819413619552885	-3.49650654975782	0.000471392921454812	0.00621411132696482
gene:HORVU3Hr1G094250::chr3H:645460310-645462417	127.531183165833	-2.85948021337021	0.350198993682174	-8.16530105727646	3.20634551195783e-16	1.1827477321829e-13
gene:HORVU4Hr1G026150::chr4H:155568289-155576695	92.3675945307129	-2.85586253010236	0.391046506600942	-7.30312758685944	2.81154340780159e-13	5.39414275992747e-11
gene:HORVU5Hr1G086970::chr5H:577522297-577536014	102.063374882697	-2.85454269720994	0.357397611017528	-7.98702232251336	1.38237067966575e-15	4.27437145744882e-13
gene:HORVU1Hr1G052230::chr1H:387189285-387201622	20.7746723469778	-2.85317757865855	0.631285191602196	-4.51963330775621	6.1946831862669e-06	0.000184489247414232
gene:HORVU7Hr1G121880::chr7H:654940612-654942028	10.1526485697358	-2.85133304449558	0.633874988038119	-4.4982576979739	6.85126214416909e-06	0.000202323929555196
gene:HORVU2Hr1G100210::chr2H:690022118-690026335	55.6456188979055	-2.83309958393939	0.289596702122658	-9.78291383559829	1.33316105929026e-22	1.33481163964938e-19
gene:HORVU1Hr1G090860::chr1H:547147127-547147958	12.6429382822547	-2.83215914263051	0.930199405746201	-3.04467958712419	0.0023292831880314	0.0215683082661534
gene:HORVU6Hr1G073530::chr6H:509254968-509256836	21.8595325141961	-2.82077445376618	0.704064078252194	-4.00641722947806	6.16467142329786e-05	0.00119463945941254
gene:HORVU1Hr1G059560::chr1H:433914453-433916300	16.7337680843054	-2.81632832190686	0.784591585037607	-3.58954693832444	0.000331253183129696	0.0046744492808624
gene:HORVU1Hr1G084630::chr1H:534225421-534226594	28.1889751004658	-2.81148498583154	0.515048514511622	-5.45867992357464	4.79687609178393e-08	2.73330939582246e-06
gene:HORVU5Hr1G080820::chr5H:562243720-562245090	15.4962083844928	-2.80439346272571	0.983406049008567	-2.85171467630588	0.00434841127639949	0.0344887572604963
gene:HORVU7Hr1G115230::chr7H:641037348-641038074	16.3416765984068	-2.78799433915082	0.710514042818298	-3.92391166273375	8.71226926137479e-05	0.00156835764974029
gene:HORVU5Hr1G113130::chr5H:640924167-640924994	15.0168122896228	-2.78558493943256	0.979733298864058	-2.84320737353959	0.00446620007288727	0.0351182957114913
gene:HORVU1Hr1G016870::chr1H:56454576-56456069	48.4141208041683	-2.78092250847141	0.630092798703412	-4.41351260353065	1.01706794113052e-05	0.000280157246272411
gene:HORVU2Hr1G024630::chr2H:74816753-74818909	4.82259060491617	-2.77710715942046	1.02188020830795	-2.71764453097575	0.00657484326874781	0.0470053228727275
gene:HORVU4Hr1G080430::chr4H:615649156-615650856	39.5719286771127	-2.77358647117182	0.374534378292871	-7.40542559487819	1.30730521625051e-13	2.77650499766497e-11
gene:HORVU7Hr1G041470::chr7H:114756291-114758856	41.1161649425096	-2.77356905657118	0.378690486442301	-7.32410545252442	2.4049752153205e-13	4.72588868012419e-11
gene:HORVU7Hr1G041690::chr7H:116645321-116647602	9.7195798704263	-2.76544061642114	0.973381034826358	-2.84106687666713	0.00449628822702481	0.0352757299482924
gene:HORVU6Hr1G058620::chr6H:383612549-383613668	17.1982629988051	-2.75097710532296	0.58846277795637	-4.67485320800855	2.94163950283385e-06	9.9120051581065e-05
gene:HORVU3Hr1G073280::chr3H:552906681-552907580	20.2679397265826	-2.74622843492451	0.527230066772048	-5.20878570476494	1.90080490520173e-07	9.25146387425268e-06
gene:HORVU7Hr1G011230::chr7H:15836421-15838255	21.9238606536319	-2.74059591705675	0.620680008818267	-4.41547315544231	1.00789287682286e-05	0.00027847510680785
gene:HORVU2Hr1G104950::chr2H:705243907-705284815	4.96528385610279	-2.72395179085553	0.826633357091317	-3.29523575051499	0.000983391423839201	0.0110158700466931
gene:HORVU2Hr1G092070::chr2H:650773965-650775199	4.87462683200391	-2.72159219820015	0.876674632644491	-3.10444958352503	0.00190633413928061	0.0184033891701166
gene:HORVU4Hr1G020340::chr4H:100801314-100803658	11.7929877535398	-2.71957455150308	0.954571473967325	-2.84900044226146	0.00438568195045526	0.0346927572198165
gene:HORVU4Hr1G009060::chr4H:25915837-25916603	31.7824840860154	-2.71749689401606	0.434615873908358	-6.25264068147926	4.03569926196714e-10	3.70544160183935e-08
gene:HORVU5Hr1G048000::chr5H:372386516-372387557	25.783624425275	-2.7063088171141	0.600616049296369	-4.50588827968315	6.60958579384108e-06	0.000195767176324041
gene:HORVU0Hr1G009410::chrUn:54957460-54958446	69.1621851448226	-2.70354099553776	0.891779838831094	-3.03162381320646	0.00243242140325741	0.0222947220683916
gene:HORVU4Hr1G081750::chr4H:620142725-620144144	9.4981053843381	-2.69785099230472	0.724841980229699	-3.72198502003124	0.000197662752071711	0.0031154850262817
gene:HORVU5Hr1G080230::chr5H:559462515-559464023	37.245897870794	-2.69782816068982	0.33643012256569	-8.01898516136306	1.0662238466079e-15	3.44898809211964e-13
gene:HORVU2Hr1G100870::chr2H:692295045-692296674	4.40946148008734	-2.69600804659797	0.912756135406492	-2.95370027329076	0.00313988799222668	0.0270570839854747
gene:HORVU6Hr1G010190::chr6H:18009106-18014452	463.857438886119	-2.69552349608247	0.440467758422936	-6.11968400532563	9.3761103796678e-10	8.14636763813617e-08
gene:HORVU2Hr1G019790::chr2H:51955646-51957502	213.754940727783	-2.69048697498924	0.556624247089079	-4.83357846708871	1.34100386500996e-06	4.98161612468188e-05
gene:HORVU5Hr1G074820::chr5H:545048110-545050544	24.5379734826583	-2.68547107399577	0.538125887230508	-4.99041420924142	6.02499554176655e-07	2.50854566853829e-05
gene:HORVU2Hr1G116390::chr2H:737966078-737969269	9.34568830093425	-2.68512087567191	0.986676495562186	-2.72137918329755	0.00650101438746169	0.0466360725045273
gene:HORVU5Hr1G061340::chr5H:480195890-480198064	15.0869999975368	-2.68256172797108	0.719607925160353	-3.72781015074746	0.000193150787969199	0.0030558227748987
gene:HORVU3Hr1G105300::chr3H:667845818-667847480	198.296272007146	-2.68130848792115	0.334672167107512	-8.01174627425709	1.13090997723015e-15	3.60280502746079e-13
gene:HORVU3Hr1G073140::chr3H:552518238-552519222	138.608875343098	-2.67982701697307	0.419477928989159	-6.38848156667218	1.67541015509931e-10	1.67748447243419e-08
gene:HORVU7Hr1G020190::chr7H:27478172-27480352	81.901502361682	-2.67365335444413	0.461198538179716	-5.79718523175865	6.74371933980153e-09	4.85593982324202e-07
gene:HORVU5Hr1G055950::chr5H:438233584-438234528	404.590864618583	-2.67207882839472	0.863311989715726	-3.0951485213064	0.00196714366713967	0.0188819349156486
gene:HORVU1Hr1G075780::chr1H:512294675-512333905	242.287102626228	-2.67159213424884	0.363644390492944	-7.34671619883182	2.03135538132691e-13	4.14672604347375e-11
gene:HORVU4Hr1G084740::chr4H:629614491-629616618	56.1292518914741	-2.67048677221514	0.30650025654487	-8.71283698852043	2.96362678984231e-18	1.51983455812742e-15
gene:HORVU3Hr1G086240::chr3H:616338360-616339756	31.3606824223584	-2.66596109111464	0.668204447056283	-3.98973862394856	6.61461447527411e-05	0.0012584910705039
gene:HORVU4Hr1G073400::chr4H:589822836-589828705	174.376465592747	-2.65652858438167	0.373369689607664	-7.11500868528762	1.11905788888645e-12	1.85270166706507e-10
gene:HORVU1Hr1G048290::chr1H:355988697-355990559	5.968896071902	-2.65374862265793	0.843789741705456	-3.14503541758425	0.00166066723950093	0.0166748755385609
gene:HORVU6Hr1G078950::chr6H:536453173-536454928	47.0409638897232	-2.65276988864605	0.701156284524486	-3.78342168100956	0.000154687014212981	0.00255294282640669
gene:HORVU2Hr1G064730::chr2H:440268420-440269804	30.5890911336739	-2.6344092878324	0.418676638554218	-6.292229002625	3.12939349595433e-10	2.96390214621333e-08
gene:HORVU1Hr1G020410::chr1H:80434080-80435278	123.080544894561	-2.62873300360532	0.31751666001744	-8.27903960523185	1.24172637350836e-16	4.92613938290317e-14
gene:HORVU6Hr1G070610::chr6H:491984196-491987373	35.5288727757419	-2.62421852837487	0.384418471852923	-6.82646313983289	8.70336438489946e-12	1.17897871983113e-09
gene:HORVU3Hr1G087320::chr3H:620778342-620779933	12.1231593291828	-2.6148623634364	0.671404889019977	-3.89461322995906	9.83555397968586e-05	0.00173783494098214
gene:HORVU4Hr1G074780::chr4H:595349400-595350927	63.4436797769002	-2.60668639917763	0.308141195636038	-8.45938951394386	2.68780862258998e-17	1.15334416527708e-14
gene:HORVU3Hr1G065640::chr3H:499660671-499662141	27.7446195400159	-2.59393124057678	0.674939488791246	-3.84320562606622	0.000121437638878711	0.00208777415786082
gene:HORVU0Hr1G006830::chrUn:39519127-39520947	18.6847028332846	-2.58447478467256	0.617309543975912	-4.18667556640499	2.83069991258707e-05	0.000642052819439651
gene:HORVU2Hr1G126150::chr2H:762827280-762830345	163.174185721192	-2.58121824098641	0.749972509897176	-3.44175047341442	0.000577963119378896	0.00730351014277713
gene:HORVU5Hr1G042030::chr5H:319885455-319887929	42.2083144865728	-2.57797383052589	0.726254386715891	-3.54968434983704	0.00038569331016703	0.00528311891828793
gene:HORVU5Hr1G092750::chr5H:589153179-589153800	6.02918635977634	-2.573793791664	0.905637499471177	-2.84196910261214	0.00448358365886238	0.0352286360281168
gene:HORVU7Hr1G007890::chr7H:10316668-10318296	5.7032696230132	-2.57204818019331	0.764651709070653	-3.36368591043802	0.000769090168544188	0.00919322904139289
gene:HORVU6Hr1G034380::chr6H:160509374-160511083	33.9715563719034	-2.56912444469709	0.587745119577359	-4.37115402428951	1.23591566946625e-05	0.000330195207956764
gene:HORVU1Hr1G071200::chr1H:492399229-492401422	9.41724184599249	-2.56704704080367	0.643055574417729	-3.99195208458937	6.55316157511788e-05	0.0012537468178201
gene:HORVU3Hr1G081570::chr3H:595141293-595146060	14.3223230627956	-2.56697993039589	0.721677596611858	-3.55696219814414	0.000375168117384059	0.00517942091013008
gene:HORVU4Hr1G007420::chr4H:19477278-19479643	13.1293122441114	-2.56678699765639	0.948528136604068	-2.70607365095782	0.00680839441782013	0.0482647677104134
gene:HORVU1Hr1G044770::chr1H:325016371-325018398	17.059680439137	-2.55204297713239	0.675998979803391	-3.77521720206535	0.000159868302239429	0.00261790570318243
gene:HORVU3Hr1G005800::chr3H:14176218-14177493	72.7353481362693	-2.54803047632071	0.488585260220983	-5.2151194147123	1.83698855417443e-07	8.98244682327244e-06
gene:HORVU2Hr1G119500::chr2H:745271153-745272964	125.252776447377	-2.54785989163508	0.611055228473821	-4.16960656403947	3.05125921243885e-05	0.000679616273312916
gene:HORVU1Hr1G019770::chr1H:74708904-74711535	45.370498606009	-2.54255276577656	0.601512676084527	-4.22693131311379	2.36899943270971e-05	0.000552579296010148
gene:HORVU7Hr1G058940::chr7H:262015646-262020074	31.3299537579834	-2.54144198242357	0.921595287260291	-2.75765514163895	0.0058217580186051	0.0429905995768487
gene:HORVU2Hr1G088640::chr2H:634326986-634329886	6.85406345142826	-2.53907971781045	0.891114143863357	-2.8493316319753	0.00438111873968918	0.0346697036585264
gene:HORVU1Hr1G081410::chr1H:527666232-527669094	53.4532575201105	-2.53387761952312	0.557471097089714	-4.54530760922184	5.48550826324402e-06	0.000167451901648302
gene:HORVU3Hr1G001390::chr3H:2974716-2976439	23.8516874019768	-2.5328908833777	0.441468396236478	-5.73742289362186	9.61280195888416e-09	6.58367341978822e-07
gene:HORVU7Hr1G108670::chr7H:625955320-625955821	23.5498304762228	-2.53188778366485	0.554427710546674	-4.56666890110592	4.95535782823676e-06	0.000153448238139184
gene:HORVU5Hr1G084700::chr5H:573122181-573123485	115.0236283423	-2.52378280394422	0.482500088040999	-5.23063698120978	1.68926948254123e-07	8.31816865103323e-06
gene:HORVU5Hr1G096900::chr5H:602486265-602487875	4.81822750929266	-2.52311570339518	0.934080389163599	-2.70117618640345	0.00690947257134271	0.0487447966588012
gene:HORVU6Hr1G070880::chr6H:493963156-493966089	13.8390279673194	-2.52256683582661	0.639573615530694	-3.94413836745513	8.00874088680466e-05	0.00146938731139577
gene:HORVU7Hr1G122080::chr7H:655263904-655267703	47.7816526563169	-2.50876344769251	0.422970138205142	-5.93130157684028	3.00542610862954e-09	2.3318114154998e-07
gene:HORVU3Hr1G006060::chr3H:15082130-15085272	521.036062689935	-2.50729384304577	0.279082997350984	-8.98404369612139	2.60994033865686e-19	1.56790301601712e-16
gene:HORVU3Hr1G098500::chr3H:658905085-658906491	3.81808344500689	-2.50572238460214	0.885317357016283	-2.83030979201288	0.00465029526226046	0.036240588652442
gene:HORVU1Hr1G080600::chr1H:525702416-525728248	49.5331009142562	-2.49874042513717	0.371934131967661	-6.71823371498055	1.83940504786127e-11	2.28848109682433e-09
gene:HORVU5Hr1G087210::chr5H:578077214-578087023	10.0314256189934	-2.49775885143963	0.701806867547946	-3.55904019601089	0.000372212567761713	0.00514877726957749
gene:HORVU5Hr1G082380::chr5H:567394841-567396917	12.9269209642824	-2.49423079096608	0.51260989416031	-4.86574843634613	1.14024477976286e-06	4.32161379665194e-05
gene:HORVU2Hr1G010560::chr2H:20068508-20072471	83.9747167888343	-2.48345857772304	0.804022439057697	-3.08879262204873	0.00200971668741195	0.0191725513019618
gene:HORVU6Hr1G021090::chr6H:61620464-61621643	33.9742417603384	-2.48324757895201	0.381056024668688	-6.51675191623357	7.18461029649297e-11	7.70732735173781e-09
gene:HORVU6Hr1G077860::chr6H:532417118-532419141	47.6875425372973	-2.47758654175601	0.479534936353719	-5.16664450059686	2.38333957304759e-07	1.12865085276799e-05
gene:HORVU4Hr1G080890::chr4H:617676760-617679847	96.035527779953	-2.47105680290768	0.435913025844331	-5.66869227667934	1.43891531287261e-08	9.22504768865276e-07
gene:HORVU3Hr1G051820::chr3H:375961169-375963870	21.1745655707396	-2.45925795378618	0.806884707111063	-3.04784305875769	0.00230490269375369	0.0214579587119474
gene:HORVU3Hr1G019190::chr3H:51806646-51808024	137.395450430703	-2.45557449528748	0.318154192586034	-7.71818996106251	1.17993261761001e-14	2.95348371641287e-12
gene:HORVU5Hr1G081950::chr5H:565970904-565982631	74.0034867069432	-2.45414034065381	0.619975860446672	-3.95844499314164	7.54393097837547e-05	0.00139998846205934
gene:HORVU3Hr1G085640::chr3H:613180754-613184146	37.3246206657659	-2.4494271870925	0.298603747233543	-8.20293519349831	2.34587675080935e-16	8.96807355682135e-14
gene:HORVU1Hr1G078720::chr1H:520957551-520963717	12.9948855572358	-2.44668387192356	0.854014481695242	-2.86492082320059	0.00417113520486963	0.0333468778774102
gene:HORVU2Hr1G090310::chr2H:643272920-643277890	77.1329297451801	-2.42932469763282	0.317061989894295	-7.66198653595384	1.83078837277319e-14	4.42461566964701e-12
gene:HORVU6Hr1G061280::chr6H:410507580-410509354	30.7558132469071	-2.42837753729981	0.364353914372538	-6.66488664320178	2.64869711686483e-11	3.07687876128176e-09
gene:HORVU4Hr1G071020::chr4H:578664348-578666723	57.8546461725121	-2.42501894960815	0.81537234275553	-2.97412460841248	0.00293825728554863	0.0257415823691439
gene:HORVU2Hr1G004620::chr2H:10361354-10503774	1011.19583778655	-2.42152507939131	0.893600822141792	-2.70985099766065	0.00673134403353874	0.0478637942675636
gene:HORVU7Hr1G036410::chr7H:84565372-84567309	37.8891991807193	-2.42010642198233	0.470515695914581	-5.14351900052593	2.69639369198032e-07	1.24877475258983e-05
gene:HORVU3Hr1G093100::chr3H:640881909-640897747	145.474661859132	-2.41935672273347	0.44770790107657	-5.40387318811177	6.52170600188001e-08	3.59909161143121e-06
gene:HORVU5Hr1G094710::chr5H:596741543-596742532	63.0931368142467	-2.41749572545165	0.515559899199473	-4.68906858195406	2.74451402142613e-06	9.33756501852846e-05
gene:HORVU5Hr1G034830::chr5H:237020034-237022038	84.2595627541249	-2.41381781455278	0.553870891126809	-4.35808751321457	1.31203923149826e-05	0.000342497624701977
gene:HORVU6Hr1G055090::chr6H:350443261-350444593	226.200905396282	-2.41336705763613	0.37847390590908	-6.37657450079501	1.81092676978133e-10	1.79606350289727e-08
gene:HORVU0Hr1G017490::chrUn:92670361-92673510	43.4404198776239	-2.41044357377558	0.580617617638744	-4.15151642070107	3.30279562368214e-05	0.000726324775438985
gene:HORVU4Hr1G029380::chr4H:186120450-186120924	30.6417700680709	-2.40436940640556	0.406011976728014	-5.92191744140652	3.18209372605269e-09	2.44185046291912e-07
gene:HORVU2Hr1G072180::chr2H:516922163-516923941	38.4049190741195	-2.40241616087003	0.599437720673567	-4.00778275709863	6.12914591460342e-05	0.00118885075646173
gene:HORVU7Hr1G048690::chr7H:166826519-166829936	81.070453821066	-2.39945397582852	0.550196177885054	-4.36108804872471	1.294172706805e-05	0.000340140941666024
gene:HORVU6Hr1G074030::chr6H:512158866-512163479	1371.1968991771	-2.39034085064211	0.121089132015729	-19.7403417701567	9.71188940613639e-87	2.04202186653424e-82
gene:HORVU4Hr1G083820::chr4H:626773883-626777091	17.6623707363424	-2.39024857462017	0.74388145115105	-3.21321168974116	0.00131259506124465	0.0137648996297906
gene:HORVU6Hr1G010980::chr6H:19367550-19369782	18.1237196408073	-2.38618701201676	0.501201464491613	-4.76093383812666	1.92699218793789e-06	6.91415319856351e-05
gene:HORVU2Hr1G004550::chr2H:10214914-10217778	583.070216922428	-2.37926781773624	0.865883115904247	-2.74779329222923	0.00599978212867452	0.0440472831834883
gene:HORVU3Hr1G053210::chr3H:390553512-390555229	7.06291606644421	-2.37325474020688	0.763345537607962	-3.10901763786262	0.0018771051221738	0.0182333207838305
gene:HORVU1Hr1G084720::chr1H:534337217-534338106	9.45394110019219	-2.36658416994196	0.592894603234502	-3.99157650791758	6.56355060529611e-05	0.00125459286388142
gene:HORVU7Hr1G117400::chr7H:645017676-645020938	20.5299398940118	-2.36554082607038	0.481609852929442	-4.91173677548692	9.02731892634496e-07	3.53783058804601e-05
gene:HORVU6Hr1G061420::chr6H:411344085-411345411	182.330838591915	-2.36539281350548	0.758651605240628	-3.11789073820681	0.00182150317500867	0.0178658726949493
gene:HORVU6Hr1G086570::chr6H:561759999-561764441	8.76331859149257	-2.36352642539388	0.808299920225313	-2.92407108581063	0.00345485839383145	0.0291149709774349
gene:HORVU2Hr1G109330::chr2H:716404109-716405772	45.6017779043927	-2.35854618350753	0.640951435180357	-3.67975801917638	0.000233455375031376	0.00357511486919863
gene:HORVU2Hr1G114210::chr2H:731202436-731205790	35.1130185437736	-2.35097940355921	0.587353902044336	-4.00266244146233	6.26336354553152e-05	0.00120819708172794
gene:HORVU6Hr1G010200::chr6H:18013578-18148259	726.773982951814	-2.34928233752438	0.421106776577819	-5.57882814571672	2.42144323918826e-08	1.49305764067954e-06
gene:HORVU2Hr1G123480::chr2H:755770377-755771998	127.351492022052	-2.34926645306285	0.412421761515451	-5.69627180784649	1.22455599972288e-08	8.09670265728719e-07
gene:HORVU3Hr1G110460::chr3H:681661745-681668542	10.469844412929	-2.34446238013972	0.601544856978016	-3.89740241803015	9.72299799206325e-05	0.00172750039581527
gene:HORVU2Hr1G124820::chr2H:759205585-759206080	14.8220374781342	-2.34348356738265	0.724251841810958	-3.23573021440011	0.0012133200102767	0.0129367477363478
gene:HORVU7Hr1G047740::chr7H:161049540-161051630	17.8346641086346	-2.33765932656892	0.675851843494759	-3.45883398716667	0.000542519183544542	0.00694279266780739
gene:HORVU7Hr1G114950::chr7H:640595998-640598651	86.8107141600238	-2.33505776053391	0.338560496093892	-6.89701777813537	5.31055385077076e-12	7.75414619904902e-10
gene:HORVU4Hr1G010050::chr4H:29620174-29621323	32.4195579184217	-2.32781979297444	0.532139149936817	-4.37445693152032	1.2173515336906e-05	0.000326064119074886
gene:HORVU3Hr1G039010::chr3H:228276303-228277242	26.1206047811119	-2.32655255503624	0.410413634314709	-5.66879937826875	1.43801627281119e-08	9.22504768865276e-07
gene:HORVU6Hr1G021780::chr6H:67713929-67718653	15.7175279343631	-2.32258503851663	0.830655567507405	-2.79608676492248	0.00517255118513966	0.0393765609046873
gene:HORVU4Hr1G009140::chr4H:26027625-26032352	95.4608212072899	-2.3189493767344	0.285931668872249	-8.1101522817694	5.05563618111416e-16	1.77166343906844e-13
gene:HORVU3Hr1G063630::chr3H:485950088-485951352	75.1492276310154	-2.31239454491381	0.490396984935505	-4.71535228793858	2.41292891979184e-06	8.35819496994123e-05
gene:HORVU3Hr1G086980::chr3H:619548955-619552053	23.8203130418978	-2.3058803253039	0.750729846629467	-3.07151811754462	0.00212973238974054	0.0201438386084951
gene:HORVU5Hr1G066950::chr5H:509660833-509666741	17.0123918033065	-2.29889640920867	0.46091904133684	-4.98763601204454	6.11225870617025e-07	2.52984944007747e-05
gene:HORVU3Hr1G107090::chr3H:672401412-672407427	50.1609751008213	-2.29332340185032	0.379369220983865	-6.04509610954405	1.49320963014941e-09	1.23122453660869e-07
gene:HORVU3Hr1G082300::chr3H:598682204-598684850	12.8323291785674	-2.27709157633789	0.64058721890787	-3.55469405121769	0.00037841915028743	0.00520382017916514
gene:HORVU3Hr1G056640::chr3H:424129543-424130911	30.1463391266236	-2.27653142624013	0.608321820852392	-3.74231426229329	0.000182333292642143	0.0029131761482475
gene:HORVU6Hr1G089590::chr6H:570107769-570109318	30.362045366309	-2.27567283227983	0.697813711751472	-3.26114662689563	0.0011096264452358	0.0121137100921745
gene:HORVU1Hr1G017240::chr1H:58438522-58442634	80.4046129695399	-2.27361114774473	0.258045297525783	-8.81089936357998	1.24145781283243e-18	6.52572299315366e-16
gene:HORVU1Hr1G013660::chr1H:36589025-36595249	5.45066015432086	-2.26755200108694	0.735942838376037	-3.08115234342197	0.00206201118223976	0.019606841627033
gene:HORVU6Hr1G081080::chr6H:544207840-544211747	35.9481960789796	-2.26746063839697	0.460744245187057	-4.92129996648446	8.59712435064606e-07	3.38507746435738e-05
gene:HORVU4Hr1G025180::chr4H:146233443-146235398	20.5869576192136	-2.26731775300055	0.720532405754865	-3.14672558082269	0.00165109843723364	0.0165946442357908
gene:HORVU3Hr1G006030::chr3H:14997114-14998101	12.2932746347097	-2.26399370215262	0.623392809844718	-3.63172892981645	0.000281528755765496	0.00409365395485845
gene:HORVU2Hr1G099640::chr2H:688033944-688041787	50.1411969681611	-2.26331450977999	0.341344065095456	-6.63059575723708	3.34334696859028e-11	3.82050072617278e-09
gene:HORVU3Hr1G066310::chr3H:504702547-504704265	117.468390270566	-2.25826451641369	0.440132297681156	-5.13087662121455	2.88395904174676e-07	1.31822006112538e-05
gene:HORVU4Hr1G043960::chr4H:351442596-351444197	24.5181669377485	-2.25816774521352	0.777850897569852	-2.90308560711113	0.00369505617108927	0.030671152227174
gene:HORVU1Hr1G004800::chr1H:9950585-9959957	37.7071155266918	-2.25549425426509	0.611072146550684	-3.6910441213802	0.000223335389301225	0.00345791597602913
gene:HORVU1Hr1G057540::chr1H:420007635-420008590	12.6119673590271	-2.25546278135583	0.803551519010735	-2.80686767182342	0.00500257871587011	0.0383743962349087
gene:HORVU7Hr1G008840::chr7H:11502165-11509352	73.564526257057	-2.25318250430199	0.370861111565958	-6.07554266012941	1.23569122740596e-09	1.0396996258777e-07
gene:HORVU3Hr1G066390::chr3H:505121581-505124856	22.4448198400749	-2.24930834266205	0.617149382434098	-3.64467405572141	0.000267730893774393	0.00395316697507049
gene:HORVU2Hr1G067340::chr2H:471831942-472010325	59.4400193755839	-2.24070044958894	0.386673764153984	-5.79480858881502	6.83991469052927e-09	4.90839748406377e-07
gene:HORVU6Hr1G083680::chr6H:552312784-552319539	22.4180528847314	-2.24024690663233	0.475838906211589	-4.70799440186206	2.50165970017647e-06	8.60882108934705e-05
gene:HORVU5Hr1G085800::chr5H:575543847-575559425	24.8686696082312	-2.24003696342596	0.444225158287258	-5.04257114131622	4.59317902587955e-07	1.97497305108678e-05
gene:HORVU1Hr1G052010::chr1H:385625810-385629388	32.3168296829341	-2.23609987463682	0.673632108699623	-3.3194674745439	0.000901893104244563	0.0103624067813367
gene:HORVU6Hr1G019800::chr6H:54480461-54482036	17.2477498782774	-2.23296051824278	0.759413779597237	-2.94037398087121	0.0032781631828439	0.0280075819107988
gene:HORVU2Hr1G004480::chr2H:9874632-9877512	150.001120927562	-2.2229212604438	0.726002421478682	-3.06186480193313	0.00219962778335997	0.0206470418629138
gene:HORVU1Hr1G005760::chr1H:12508775-12510529	8.9327806856313	-2.21735097562111	0.804987582991229	-2.75451574964887	0.00587790608760868	0.0432885651131559
gene:HORVU5Hr1G069980::chr5H:526655288-526657023	72.2894386369665	-2.21637800943119	0.429779623641776	-5.15701044793728	2.50923807063776e-07	1.17242754829399e-05
gene:HORVU7Hr1G036380::chr7H:84257258-84259784	20.7675469740467	-2.21355130026615	0.737758728736208	-3.00037290518811	0.00269649259297165	0.0240665557903428
gene:HORVU6Hr1G001970::chr6H:5689137-5691182	15.8274767909172	-2.21305196670142	0.608153003911989	-3.63897235147372	0.000273728182781035	0.00401303749967278
gene:HORVU1Hr1G082610::chr1H:529897028-529897691	14.1880853533535	-2.21269867931677	0.758455855996257	-2.91737305714427	0.00352993301352453	0.0296288908352762
gene:HORVU5Hr1G066250::chr5H:505672630-505679351	202.040885439077	-2.21017468091582	0.376060364943449	-5.87718059904607	4.17312854939335e-09	3.13372145998374e-07
gene:HORVU4Hr1G072560::chr4H:585761289-585762372	84.1264819921469	-2.20972522615484	0.473072600779088	-4.67100656963797	2.99727351783763e-06	0.000100672001575166
gene:HORVU5Hr1G023740::chr5H:125131388-125132520	196.425144776461	-2.20893546655777	0.755101710488823	-2.92534824895018	0.00344070941517702	0.0290306405150529
gene:HORVU5Hr1G053790::chr5H:422821552-422823597	34.5968706154135	-2.20740043205983	0.50631528681058	-4.35973491135308	1.30220096204471e-05	0.000341397474163991
gene:HORVU5Hr1G081500::chr5H:564845582-564848348	56.2594325748958	-2.20727583030339	0.424989674864845	-5.19371636735728	2.06137116123242e-07	9.94091514588825e-06
gene:HORVU0Hr1G020720::chrUn:109353869-109357088	10.193866576999	-2.20528221920265	0.69315055683037	-3.18153422437823	0.00146497212769475	0.0150400647080539
gene:HORVU2Hr1G077830::chr2H:563250200-563251216	20.5294661791811	-2.20509723512739	0.580419501886795	-3.79914394323276	0.000145196747958232	0.00241972453759803
gene:HORVU6Hr1G077610::chr6H:531437091-531439374	41.659860695659	-2.20457251267533	0.51826298736207	-4.25377186184273	2.10199461122941e-05	0.000504399101755136
gene:HORVU4Hr1G069380::chr4H:570486965-570488044	39.0886145041837	-2.20272322611926	0.520200974592151	-4.23436966423649	2.29193664676746e-05	0.000542026360502187
gene:HORVU6Hr1G019870::chr6H:54653127-54654740	28.6477102088075	-2.20075917358633	0.76053772563187	-2.89368837260229	0.00380745831711859	0.031259515257999
gene:HORVU2Hr1G122610::chr2H:753435989-753437007	25.9546297141313	-2.19863684355405	0.698148527925133	-3.14923938905709	0.0016369604085337	0.0164998703498703
gene:HORVU5Hr1G023730::chr5H:125044327-125286952	306.131216079012	-2.19788624902151	0.679983268893501	-3.23226518881561	0.00122813023952616	0.01306154092882
gene:HORVU5Hr1G044610::chr5H:345055321-345057100	87.1516601094813	-2.19614159325374	0.321744083398716	-6.82574041472647	8.74729764547021e-12	1.17897871983113e-09
gene:HORVU2Hr1G041590::chr2H:205853241-205863041	72.5510622773573	-2.19612094770905	0.324847155337447	-6.76047461590899	1.37540427077109e-11	1.75268183013533e-09
gene:HORVU7Hr1G089230::chr7H:541298469-541301411	515.595693282856	-2.19062871417332	0.29690066922816	-7.37832191442412	1.60297014898047e-13	3.30431866200621e-11
gene:HORVU7Hr1G075960::chr7H:442019708-442022925	13.2731711484687	-2.18723523677944	0.483201868465638	-4.52654548651644	5.99556989053418e-06	0.000179594906792301
gene:HORVU2Hr1G007420::chr2H:15087014-15113271	43.3885465647085	-2.18664117715079	0.415189180749152	-5.26661406062002	1.38962920260548e-07	7.00679702973208e-06
gene:HORVU6Hr1G060850::chr6H:406692606-406694443	44.0323203561854	-2.18005271926325	0.325726260092709	-6.69289825954702	2.18793264295568e-11	2.64098346807801e-09
gene:HORVU2Hr1G038140::chr2H:177374427-177380781	289.799809904269	-2.17970500164183	0.477019987349918	-4.56942069398637	4.89074186473833e-06	0.000151894739214163
gene:HORVU0Hr1G027070::chrUn:143560623-143561872	59.6268308676598	-2.17847937602927	0.289844781474833	-7.51602069543706	5.64686185627424e-14	1.2630948658513e-11
gene:HORVU1Hr1G014950::chr1H:41849812-41851378	21.4510547092075	-2.17446871456237	0.510678618281745	-4.25799835105432	2.06265470205043e-05	0.000496217136902888
gene:HORVU2Hr1G119520::chr2H:745302205-745303231	38.6425253471733	-2.17384108449736	0.311172115597142	-6.985976491903	2.82881443078337e-12	4.47207911440985e-10
gene:HORVU3Hr1G020140::chr3H:61369252-61370521	24.10620874287	-2.17353662611667	0.475090862957072	-4.57499142919334	4.76239482439539e-06	0.000148787687336905
gene:HORVU2Hr1G017400::chr2H:41955171-41958298	120.39015752207	-2.17219783312814	0.284360830496522	-7.6388784958015	2.19121966249744e-14	5.17669490153608e-12
gene:HORVU1Hr1G057410::chr1H:419337463-419339152	84.3176329299147	-2.170555271333	0.626622550276738	-3.46389588177828	0.000532412540979021	0.0068426076324113
gene:HORVU7Hr1G040790::chr7H:111351004-111354169	86.396988984746	-2.1702981094084	0.465487013705122	-4.66242461230775	3.12505578509973e-06	0.000104629654359087
gene:HORVU4Hr1G010470::chr4H:31620063-31621973	165.221920073083	-2.16303994779088	0.287241303576549	-7.53039316023864	5.05877690913634e-14	1.1437187450699e-11
gene:HORVU7Hr1G040030::chr7H:106859072-106860440	154.638421490631	-2.16205557313183	0.40898440584412	-5.28640100267263	1.24746276150584e-07	6.38178881348461e-06
gene:HORVU3Hr1G081580::chr3H:595204526-595205959	69.3489885854322	-2.15528198399672	0.617577176822183	-3.48989901972574	0.000483203095533939	0.00632616954339764
gene:HORVU2Hr1G119590::chr2H:745383174-745383577	15.1085490597316	-2.1512564955798	0.534960708789003	-4.02133551162967	5.78691110090623e-05	0.00114142207136636
gene:HORVU2Hr1G081370::chr2H:589925468-589930320	139.298504099982	-2.15099340775493	0.309953506587138	-6.93972922403513	3.9285219771619e-12	5.85823426183021e-10
gene:HORVU2Hr1G008120::chr2H:16818681-16819627	17.3929429612273	-2.15091638975315	0.495970916181915	-4.33677927389643	1.4458568729567e-05	0.000369387443630469
gene:HORVU3Hr1G105620::chr3H:669160744-669168133	38.9861152090632	-2.14959890723041	0.351730316572389	-6.11149737724698	9.87006249199392e-10	8.5402441957475e-08
gene:HORVU5Hr1G081860::chr5H:565886212-565891313	102.423244115773	-2.14792185492941	0.296692998134838	-7.23954346220616	4.50197597137444e-13	8.09047408325803e-11
gene:HORVU1Hr1G023750::chr1H:105662510-105664061	483.044568888388	-2.14744211477513	0.320302552229637	-6.7044177444941	2.02211018912861e-11	2.48636776822328e-09
gene:HORVU1Hr1G042250::chr1H:305336423-305341152	48.6810623421749	-2.14666870991022	0.352351855867471	-6.09240074704656	1.11229808461013e-09	9.46849373563266e-08
gene:HORVU2Hr1G037040::chr2H:167901850-167904079	13.6642197258597	-2.1424266152142	0.675979088925393	-3.16936818063415	0.00152770738120977	0.0156005708583374
gene:HORVU6Hr1G063800::chr6H:431718148-431720955	19.7428306564712	-2.13106067546242	0.393972989480024	-5.40915426277079	6.33230689295046e-08	3.5223038288671e-06
gene:HORVU0Hr1G011720::chrUn:66967850-66979517	405.27329618739	-2.13099676925366	0.678843128051336	-3.13915937452416	0.00169433269507483	0.0169084169803651
gene:HORVU1Hr1G062130::chr1H:447891395-447898232	9.15007020815694	-2.12809118302334	0.64080748488966	-3.320952443915	0.000897108219646551	0.0103187075636151
gene:HORVU5Hr1G078270::chr5H:554715736-554717200	25.2860382267144	-2.12605744387046	0.469651834509585	-4.52687988771621	5.9860940864577e-06	0.000179594906792301
gene:HORVU5Hr1G001080::chr5H:3739553-3742570	36.131992391974	-2.12314182840922	0.411439719384316	-5.16027434489388	2.46588221177937e-07	1.15731337912663e-05
gene:HORVU5Hr1G014060::chr5H:47907677-47908854	109.13307970228	-2.12203087891096	0.331430015755326	-6.40265147402195	1.5270150503573e-10	1.54360665619291e-08
gene:HORVU1Hr1G066540::chr1H:473048538-473050098	39.9712825418931	-2.11952677597107	0.485135083195518	-4.36894145442963	1.24850228328801e-05	0.000331938565282027
gene:HORVU2Hr1G123030::chr2H:754603166-754604890	54.136848362857	-2.11755352082479	0.431778681618258	-4.90425676619428	9.37817496955451e-07	3.65835819869858e-05
gene:HORVU1Hr1G016840::chr1H:56148394-56150007	96.3782626819568	-2.11690368670435	0.515381989114611	-4.10744599426348	4.00058279090233e-05	0.000847092182895391
gene:HORVU7Hr1G100090::chr7H:603296767-603298096	111.163165038443	-2.1093055765725	0.26887216999138	-7.84501265653537	4.32909825591435e-15	1.246898903135e-12
gene:HORVU2Hr1G121310::chr2H:751204370-751207711	236.39430892213	-2.10886479522691	0.298320163075408	-7.06913261740824	1.55905101335243e-12	2.5609848911522e-10
gene:HORVU2Hr1G104930::chr2H:704978765-704980793	29.2670856704448	-2.10867059873412	0.433235357512009	-4.86726339891514	1.13154174156326e-06	4.30231404305771e-05
gene:HORVU4Hr1G020970::chr4H:105447894-105458170	24.6721038731233	-2.10697912166653	0.67006987035012	-3.14441704499502	0.00166418086505259	0.0167021798895445
gene:HORVU5Hr1G064080::chr5H:495301788-495304495	21.5805347291649	-2.10613417647685	0.650805715564784	-3.23619495973402	0.00121134618902281	0.0129355798761979
gene:HORVU6Hr1G022680::chr6H:72704083-72705374	21.8903552862988	-2.10250641299687	0.526814696202099	-3.99097904472714	6.58010948651592e-05	0.00125661564090358
gene:HORVU5Hr1G076690::chr5H:551803828-551807205	83.6931515097788	-2.10239739907859	0.374574769927922	-5.61275763309723	1.99127415728797e-08	1.2423896270367e-06
gene:HORVU3Hr1G010200::chr3H:22297005-22298317	23.4451654554622	-2.10183559375897	0.623418487852536	-3.37146817862119	0.000747686757991252	0.00897346031264553
gene:HORVU3Hr1G047220::chr3H:320759929-320762930	35.7091778007185	-2.09666584304828	0.522923948157559	-4.00950434654131	6.084633311307e-05	0.00118239833644677
gene:HORVU5Hr1G056770::chr5H:444517069-444517919	6.76538091982805	-2.096615088215	0.769989815786423	-2.72291275187015	0.00647091446366629	0.0464835830246147
gene:HORVU6Hr1G035420::chr6H:170800561-170804834	451.860490728402	-2.09550673042324	0.322301398613124	-6.50169915315382	7.94178063764122e-11	8.43352927712345e-09
gene:HORVU5Hr1G061950::chr5H:482615460-482618141	222.763014419858	-2.09208678506905	0.481830217360664	-4.34195845276982	1.41218241926182e-05	0.000362104238382914
gene:HORVU4Hr1G060260::chr4H:505089218-505091246	105.847954545063	-2.09200925215536	0.41619858685597	-5.02646889783728	4.9959346557386e-07	2.11783310628145e-05
gene:HORVU4Hr1G081420::chr4H:619273156-619275385	21.1344236933061	-2.08885007284802	0.518779259775316	-4.02647182493899	5.66200203335846e-05	0.00112416671155236
gene:HORVU1Hr1G081300::chr1H:527443693-527446128	11.9973029451015	-2.08850521814993	0.686819433124395	-3.04083594235119	0.0023592234065808	0.0217661392482527
gene:HORVU2Hr1G022780::chr2H:66441876-66445090	131.241109099868	-2.08636821335242	0.527640771801127	-3.95414517765657	7.68087635144977e-05	0.00141789382059335
gene:HORVU5Hr1G059090::chr5H:461407080-461408247	41.0526877657556	-2.08378946106139	0.308573232962199	-6.75298191310282	1.44837003063523e-11	1.83454387133351e-09
gene:HORVU5Hr1G001060::chr5H:3673559-3683376	94.7819495890708	-2.07939019338214	0.287024973319334	-7.24463160586616	4.33616183699912e-13	7.85966713661583e-11
gene:HORVU7Hr1G115200::chr7H:641002434-641005851	97.0740183732882	-2.07844290299415	0.465621862767135	-4.46380006866992	8.05187015530665e-06	0.000231282270335352
gene:HORVU5Hr1G098360::chr5H:607217530-607218995	28.2078984475179	-2.07538608530549	0.587792314572035	-3.53081527923099	0.000414280958462518	0.00560931298319461
gene:HORVU5Hr1G096840::chr5H:602327846-602328386	14.3576285976793	-2.07356315519782	0.763249547255605	-2.716756482403	0.00659250934140027	0.0471009561507808
gene:HORVU2Hr1G101990::chr2H:695390580-695392263	35.9286117355498	-2.06971628140046	0.610900079114191	-3.38797841441036	0.000704098052951599	0.00853769645983871
gene:HORVU1Hr1G054230::chr1H:400987479-400989243	168.857346978448	-2.06776847389128	0.337776703307275	-6.12170245503944	9.2580787417562e-10	8.07719351137617e-08
gene:HORVU0Hr1G009120::chrUn:53914373-53917500	46.5586280153864	-2.06624139150813	0.356097016650089	-5.80246757174738	6.53460347741509e-09	4.72153170845806e-07
gene:HORVU3Hr1G007290::chr3H:17670259-17672803	113.332951955546	-2.06519139511355	0.269194618141952	-7.67174102278871	1.69677276405512e-14	4.19721695729681e-12
gene:HORVU7Hr1G047060::chr7H:156508232-156509807	15.3652490990099	-2.06161205609616	0.56133600261856	-3.67268809853457	0.000240012362405794	0.00365272389339713
gene:HORVU7Hr1G026000::chr7H:44237191-44240267	15.3172062193545	-2.06065985017823	0.628017285637483	-3.28121517879323	0.00103360857381287	0.0114442621764031
gene:HORVU7Hr1G039180::chr7H:102290315-102292591	30.0351700973187	-2.06012387019095	0.409704538485828	-5.02831596106962	4.94806090442537e-07	2.10177633487773e-05
gene:HORVU1Hr1G087380::chr1H:539136627-539138258	13.0005171779344	-2.05979799004421	0.661610300467904	-3.11331003853399	0.00185001561269493	0.0180831119354594
gene:HORVU2Hr1G097200::chr2H:678098662-678099437	1268.53729908834	-2.0592954756286	0.33718573974712	-6.1073029872883	1.01328770863916e-09	8.69607647422328e-08
gene:HORVU7Hr1G105150::chr7H:616214322-616217218	16.8952885918495	-2.05730972906361	0.669765000512059	-3.07168891699436	0.00212851425031497	0.0201413774199472
gene:HORVU3Hr1G084530::chr3H:608253178-608257632	14.1807515326439	-2.05568336818702	0.619550071255836	-3.3180261992709	0.000906559807294171	0.0104046542075149
gene:ENSRNA049486924::chr1H:527323306-527323413	43.1250740651428	-2.05390595389393	0.380564039617208	-5.39700481411712	6.77625706204667e-08	3.72004127902332e-06
gene:HORVU4Hr1G075090::chr4H:596522372-596526349	57.6479881982671	-2.05362140188386	0.405822148091275	-5.06039754494123	4.18383228331364e-07	1.81379912554541e-05
gene:HORVU5Hr1G072770::chr5H:536511514-536513100	135.663696929171	-2.05127765424693	0.425717823662472	-4.81839739900878	1.44715911072764e-06	5.33823990564201e-05
gene:HORVU4Hr1G089310::chr4H:642155790-642276863	36.6993477919561	-2.04764162029891	0.611179142327003	-3.35031331812587	0.000807201989694961	0.00950292779133609
gene:HORVU4Hr1G015890::chr4H:63469991-63479466	38.7756618242676	-2.04604839601346	0.537925246865378	-3.80359242838347	0.000142612747928716	0.00238740098562833
gene:HORVU7Hr1G039420::chr7H:103316923-103319245	26.7658946325344	-2.04397748768323	0.432540236397693	-4.72551988389798	2.29527372679217e-06	8.00338729345475e-05
gene:HORVU2Hr1G089540::chr2H:639339734-639342347	1313.13667836656	-2.04306492519733	0.316434972282228	-6.45650798475942	1.07146531106443e-10	1.11527869457627e-08
gene:HORVU4Hr1G089030::chr4H:641464334-641465907	14.2136853598009	-2.04175779575322	0.60286496892587	-3.38675806522818	0.000707237258672888	0.00857081879011881
gene:HORVU3Hr1G108330::chr3H:674852181-674853112	81.5534779123825	-2.03509761799898	0.31938706501402	-6.37188490369716	1.8671899549253e-10	1.83455775664764e-08
gene:HORVU3Hr1G085860::chr3H:614567606-614572411	74.1619565204727	-2.03348944456422	0.628358992234047	-3.2361905689205	0.00121136482337267	0.0129355798761979
gene:HORVU4Hr1G077780::chr4H:605450000-605451789	61.9186327138608	-2.03347122388199	0.624518895211974	-3.25606036818436	0.00112969729396176	0.0122754601048268
gene:HORVU7Hr1G116810::chr7H:644219928-644221505	61.3955952444599	-2.02853422073566	0.393039918330269	-5.16114044943164	2.45449939389206e-07	1.15454819364596e-05
gene:HORVU1Hr1G081240::chr1H:527316634-527319822	70.2737489059472	-2.02836360711823	0.393420600749894	-5.15571274928662	2.52667980834886e-07	1.1779594157504e-05
gene:HORVU2Hr1G079020::chr2H:572019692-572022449	99.8881898930524	-2.02750794715019	0.337004779710193	-6.01625872752826	1.78494208497741e-09	1.42700350869715e-07
gene:HORVU5Hr1G102010::chr5H:613511404-613512569	4.92716943736127	-2.02731809304397	0.685061269249308	-2.95932376277163	0.00308314995450461	0.0267214801910197
gene:HORVU7Hr1G088600::chr7H:537962090-537979898	14.5174079061783	-2.02654064649081	0.580153640653222	-3.49311028059573	0.000477429297927718	0.00627401776139263
gene:HORVU5Hr1G081770::chr5H:565582475-565586017	5.48771296209876	-2.02513392962123	0.729164188393325	-2.77733597159168	0.00548064951235005	0.0411410698488654
gene:HORVU0Hr1G003810::chrUn:17443361-17445805	31.4653503352095	-2.02389351691755	0.607736652750908	-3.33021467070718	0.000867790521097228	0.0100640725298347
gene:HORVU6Hr1G036920::chr6H:184145124-184147505	48.830403784855	-2.02349039489303	0.556083503263519	-3.63882471430577	0.000273885133265026	0.00401303749967278
gene:HORVU1Hr1G080160::chr1H:524601559-524604545	53.675721108434	-2.02340338774469	0.498389404389669	-4.05988443960314	4.90970090199766e-05	0.000997404552322733
gene:HORVU5Hr1G070230::chr5H:527385713-527389749	12.2478406333484	-2.02112752517206	0.722316204456738	-2.79812014835272	0.00514009885173103	0.0392082941229663
gene:HORVU3Hr1G083680::chr3H:604493777-604494654	115.930381372043	-2.02048797666518	0.397676830173067	-5.08072842912642	3.75990308669284e-07	1.66784224263299e-05
gene:HORVU5Hr1G060650::chr5H:475078660-475080354	28.6475607706732	-2.01671214572747	0.623237414178167	-3.23586501684404	0.00121274718476271	0.0129367477363478
gene:HORVU3Hr1G031540::chr3H:157224954-157226184	27.3789984791783	-2.01605474578479	0.631294075531239	-3.19352711189039	0.00140546139314412	0.0145072318371371
gene:HORVU6Hr1G001990::chr6H:5704210-5706283	9.90308200661413	-2.01600831196593	0.740116806627034	-2.72390559694702	0.00645149443805014	0.0463986199116217
gene:HORVU4Hr1G002180::chr4H:3968046-3970356	29.3480980674187	-2.01404668620548	0.402522716221777	-5.00356030862071	5.62810475346695e-07	2.36416637592282e-05
gene:HORVU2Hr1G104980::chr2H:705363650-705364960	26.7110243222085	-2.01184649232344	0.448729207930605	-4.48343111339113	7.34523217561602e-06	0.000215087939962417
gene:HORVU2Hr1G038040::chr2H:176135271-176136465	8.29562430832151	-2.01173677394022	0.647194706927898	-3.10839497357686	0.00188106490367032	0.0182347951427257
gene:HORVU4Hr1G010770::chr4H:32463850-32472265	45.006422912753	-2.00827253696855	0.456002330318714	-4.40408393431874	1.06231810458314e-05	0.000291216433728359
gene:HORVU7Hr1G008420::chr7H:11056603-11061003	48.6289760473315	-2.00615081715222	0.35161779217487	-5.70548721310013	1.16010766942704e-08	7.76828785266652e-07
gene:HORVU7Hr1G043620::chr7H:133699385-133701771	93.6565411968174	-2.00579991379762	0.389134420126235	-5.1545168200411	2.54285736832648e-07	1.18287873952285e-05
gene:HORVU1Hr1G066550::chr1H:473098094-473099694	216.834880757686	-2.00254203682918	0.315657140211672	-6.34404162531005	2.23814312111996e-10	2.15867877360863e-08
gene:HORVU3Hr1G098940::chr3H:660362991-660364873	8.34078431556364	-1.99996364103754	0.61179360152435	-3.26901692998164	0.00107921843942082	0.0118494239724607
gene:HORVU5Hr1G061930::chr5H:482523962-482526530	29.5411231702204	-1.99667864593803	0.604188860353518	-3.30472601691092	0.000950692871472847	0.0107642801914852
gene:HORVU5Hr1G078630::chr5H:555446291-555449711	417.622367903341	-1.99455995168779	0.344802246864935	-5.78464893956764	7.26639179452824e-09	5.17908996175427e-07
gene:HORVU0Hr1G016480::chrUn:88378845-88380256	29.7700898697752	-1.99268195832447	0.738632209971527	-2.69779997598708	0.00697993663638193	0.0490836614436677
gene:HORVU5Hr1G111520::chr5H:636573062-636574412	13.1297034530384	-1.98862752264887	0.706007843594768	-2.81672157142534	0.00485165648971585	0.037380333218309
gene:HORVU6Hr1G058840::chr6H:386020333-386023043	284.443153301341	-1.9864096065252	0.465889137854081	-4.26369589914619	2.01073054546069e-05	0.00048539173879284
gene:HORVU3Hr1G064790::chr3H:494375989-494379837	12.852464072347	-1.97929514289162	0.542166698409559	-3.6507132376405	0.000261513090236083	0.00389693425606229
gene:HORVU7Hr1G121040::chr7H:652993611-652996758	67.1225961587428	-1.97571775123112	0.644603356242717	-3.06501313109389	0.00217660440557002	0.0204858031475001
gene:HORVU4Hr1G062330::chr4H:522378007-522379415	20.1079586939835	-1.97383359334399	0.728766399463522	-2.70845856065404	0.00675965530708762	0.0479839677538232
gene:HORVU2Hr1G046290::chr2H:246217596-246220378	10.8668577076856	-1.96909289167596	0.575455517753571	-3.42179861158128	0.000622083723158904	0.00775336832432668
gene:HORVU5Hr1G004990::chr5H:8448244-8449155	8.38961581583457	-1.96896345244137	0.628347034121944	-3.13356050958816	0.00172699306821388	0.0171686790790851
gene:HORVU7Hr1G122120::chr7H:655448673-655451387	269.404412188223	-1.96800652922612	0.690567308345901	-2.84984027688777	0.00437411888896696	0.0346403855967681
gene:HORVU3Hr1G018350::chr3H:48121687-48122565	7.52127039832844	-1.95978855215996	0.6742866469314	-2.9064620530137	0.00365541232993968	0.0304390889700245
gene:HORVU5Hr1G083100::chr5H:569279332-569280837	23.9722267999676	-1.9557626059408	0.453420614189976	-4.3133517637585	1.60797967623035e-05	0.000404902762543943
gene:HORVU2Hr1G020430::chr2H:55711385-55713217	40.6795034904747	-1.9493836455558	0.496455245765572	-3.92660499044521	8.61532952622135e-05	0.00155356705504571
gene:HORVU2Hr1G002930::chr2H:6418716-6421210	30.540171471919	-1.94900162072317	0.419758896289091	-4.64314547697132	3.43144555915932e-06	0.000113621376892731
gene:HORVU7Hr1G012300::chr7H:17042895-17044324	28.746956112884	-1.94843698519833	0.554684829851744	-3.51269203760108	0.000443591309702897	0.00592130448578073
gene:HORVU5Hr1G005030::chr5H:8505720-8506663	10.0518379541055	-1.94831499486522	0.585714069042269	-3.32639268517318	0.000879778896149843	0.0101806445076756
gene:HORVU3Hr1G010190::chr3H:22296409-22354424	30.5964013939721	-1.94132814110531	0.621222612797794	-3.12501203451395	0.0017779778567717	0.0175017614309372
gene:HORVU3Hr1G061080::chr3H:465583481-465586647	70.1675093918289	-1.94083854066905	0.41924244453495	-4.62939419891502	3.6673704379792e-06	0.000120065404189276
gene:HORVU2Hr1G037620::chr2H:173147674-173150653	90.1920704641957	-1.93875910000476	0.308274471680123	-6.28906795116167	3.19377659879567e-10	3.01131599848779e-08
gene:HORVU1Hr1G072590::chr1H:498353918-498357549	11.0173600354339	-1.93843946187532	0.5849352257487	-3.31393866627569	0.000919916836067575	0.0105148904930449
gene:HORVU5Hr1G063510::chr5H:492893800-492900804	54.1628124558532	-1.93532768463516	0.484199433179125	-3.99696396158152	6.41600641916977e-05	0.00123086634096226
gene:HORVU4Hr1G028720::chr4H:179949761-179952022	140.271674379049	-1.93474741428298	0.62565939695845	-3.09233334253183	0.00198589708547859	0.0190143315661534
gene:HORVU5Hr1G015520::chr5H:59573267-59612647	4900.2973942853	-1.93470016754695	0.417938763555744	-4.62914746430047	3.67174236153831e-06	0.000120065404189276
gene:HORVU7Hr1G007540::chr7H:9819214-9822906	71.0763958421925	-1.93467605892534	0.505584872691881	-3.82660986003114	0.000129920180449158	0.00221369668891733
gene:HORVU4Hr1G076820::chr4H:601906895-601907985	126.843596586458	-1.93407907976623	0.473363762897021	-4.08581989447086	4.39214398356941e-05	0.000916162890858436
gene:HORVU1Hr1G092250::chr1H:550253311-550257099	22.8921793986875	-1.93381530475248	0.496331416563193	-3.89621780975105	9.7706527541351e-05	0.0017321900911336
gene:HORVU3Hr1G010240::chr3H:22401967-22405112	68.5370810264456	-1.93340986287161	0.607723532374134	-3.18139706606152	0.00146566596531925	0.0150400647080539
gene:HORVU6Hr1G027930::chr6H:110417790-110419802	81.1331080007188	-1.93338045345277	0.589669628313723	-3.27875196655736	0.00104267235660728	0.0115324718411492
gene:HORVU6Hr1G010780::chr6H:19017461-19024786	232.873105924649	-1.92679072766208	0.302908291716302	-6.36097056552903	2.00482864771566e-10	1.95155218272544e-08
gene:HORVU4Hr1G070530::chr4H:576404014-576410702	42.4886006432853	-1.92616311877641	0.411129750346956	-4.68504922631092	2.7989265448028e-06	9.49197250500381e-05
gene:HORVU4Hr1G086270::chr4H:633507862-633512183	133.434858468999	-1.92541779185648	0.337301095978658	-5.70830576838183	1.14106293786216e-08	7.66517231038009e-07
gene:HORVU4Hr1G008300::chr4H:22409666-22412651	168.619662535983	-1.92458243160553	0.35247044785279	-5.46026608281593	4.75421508993775e-08	2.71636213263671e-06
gene:HORVU2Hr1G116730::chr2H:738837787-738838597	123.960500629838	-1.9232519789612	0.643571305941108	-2.98840542020249	0.00280437282228479	0.024858660607656
gene:HORVU3Hr1G019430::chr3H:54254523-54278734	14.6876472189766	-1.92284141083406	0.599894269006382	-3.20530051740435	0.0013492153266877	0.0140787104014568
gene:HORVU2Hr1G063690::chr2H:431037477-431043094	200.172487944674	-1.92181047775973	0.460548306543406	-4.17287491986163	3.00780082804544e-05	0.000672047561896754
gene:HORVU6Hr1G040770::chr6H:220668055-220670312	33.3732539675224	-1.91840473630856	0.33496057801612	-5.72725527186139	1.02068524814978e-08	6.9192879094587e-07
gene:HORVU2Hr1G107990::chr2H:713107016-713109108	38.60551237341	-1.915319290821	0.463449224368684	-4.13274894014565	3.58450198604431e-05	0.000778592342547186
gene:HORVU3Hr1G084990::chr3H:610694720-610699392	77.2343824996095	-1.91061868620559	0.480669651280474	-3.97491017191499	7.04058246674671e-05	0.00131969303074878
gene:HORVU5Hr1G012740::chr5H:38516557-38525537	306.451273502845	-1.90770966754855	0.235665758527222	-8.09498027830033	5.72736306230926e-16	1.97415632373958e-13
gene:HORVU6Hr1G092150::chr6H:576914382-576921992	20.4956401469755	-1.90573806570795	0.613026671788784	-3.10873597089519	0.00187889541033366	0.0182333207838305
gene:HORVU3Hr1G057180::chr3H:428369321-428371199	52.4797654684409	-1.8984925692179	0.401671880132146	-4.72647616903956	2.28449588651551e-06	7.97903829067693e-05
gene:HORVU7Hr1G101740::chr7H:610497655-610603052	55.4273579535125	-1.89741084657323	0.443851111138372	-4.27488137115806	1.91239092672825e-05	0.00046810164872396
gene:HORVU3Hr1G096280::chr3H:652494001-652496723	95.4610618007733	-1.89446121303932	0.571703781374696	-3.31371118183611	0.000920665528283819	0.0105148904930449
gene:HORVU2Hr1G041110::chr2H:201618823-201620734	83.2278909351786	-1.89341508462642	0.345780099139598	-5.47577807206888	4.35593336049376e-08	2.53005123861165e-06
gene:HORVU5Hr1G103590::chr5H:616635899-616637012	50.1523994824025	-1.8930172164076	0.412424493909724	-4.58997281772009	4.43303735860459e-06	0.00014037506551509
gene:HORVU3Hr1G091120::chr3H:634579614-634581775	52.022598573063	-1.89259689587586	0.417733153272757	-4.53063607963167	5.8806361788902e-06	0.000177652667093887
gene:HORVU2Hr1G106700::chr2H:710148218-710149140	16.2467254355561	-1.88571882744291	0.626833292698592	-3.00832589686592	0.00262691270315401	0.0236276686315903
gene:HORVU5Hr1G094460::chr5H:595761423-595763633	17.8749461569413	-1.88101370031857	0.472974587224431	-3.9769868215478	6.97940313656052e-05	0.00131225748778334
gene:HORVU6Hr1G003300::chr6H:7696549-7701423	342.490896502961	-1.88045272219666	0.305573399096822	-6.15384954238387	7.56244329648357e-10	6.65305157957588e-08
gene:HORVU6Hr1G058630::chr6H:384005850-384009310	38.7704369081918	-1.87719372032405	0.483082098167341	-3.88586893914206	0.000101964508728993	0.0017925633449296
gene:HORVU6Hr1G019780::chr6H:54341383-54343807	96.1607518349902	-1.87708794592883	0.186234590938863	-10.0791584230721	6.8308665748714e-24	7.97921114462478e-21
gene:HORVU3Hr1G027910::chr3H:121820922-122027027	1723.32476973477	-1.87628936437822	0.252594467035249	-7.4280699272656	1.10193703454345e-13	2.38859052456811e-11
gene:HORVU2Hr1G081600::chr2H:591816055-592041864	24.4605874446189	-1.87615821430245	0.599368854838674	-3.13022306574044	0.00174673609053315	0.0173158288729608
gene:HORVU3Hr1G007420::chr3H:17823352-17824988	98.6582497847092	-1.87580599891399	0.441084247154555	-4.25271591768435	2.11193422751615e-05	0.000505757734256885
gene:HORVU2Hr1G113260::chr2H:727956316-727957075	11.488419273803	-1.87099638698769	0.570140525027196	-3.28164076198309	0.00103204997939894	0.0114330257464921
gene:HORVU1Hr1G047010::chr1H:346439849-346442657	50.5783699163822	-1.87065833671989	0.275978494277745	-6.77827575520163	1.21618557808356e-11	1.57848876325832e-09
gene:HORVU3Hr1G091020::chr3H:634362242-634365212	26.1882154666025	-1.86887431384538	0.54156447395074	-3.45088055760352	0.00055876079555057	0.00712030574984623
gene:HORVU4Hr1G056210::chr4H:471655606-471658804	146.112459035083	-1.86844301117516	0.363596455713174	-5.13878224558135	2.76524612063732e-07	1.27227557024948e-05
gene:HORVU2Hr1G086290::chr2H:622398928-622399239	10.0242048409297	-1.86728333808887	0.646996882624019	-2.88607779764834	0.00390075721232835	0.0317281706562537
gene:HORVU1Hr1G091350::chr1H:548123975-548126851	9.8532857282013	-1.86567566581272	0.61434303871891	-3.03686303616823	0.00239054050098814	0.0219971573627032
gene:HORVU5Hr1G066260::chr5H:505772370-505773563	31.009637163417	-1.86223465886487	0.466849215587409	-3.98894246083659	6.63685162552706e-05	0.00125944442489469
gene:HORVU5Hr1G000690::chr5H:2550564-2552346	10.0846308343957	-1.86066990467216	0.593251710809016	-3.13639197455456	0.00171040434583258	0.0170440577134957
gene:HORVU7Hr1G033520::chr7H:68875290-68878110	27.9225208135626	-1.85928724289835	0.557745109881121	-3.33357874405145	0.000857363992344629	0.00997616784894199
gene:HORVU4Hr1G078270::chr4H:607021855-607024644	249.102302670085	-1.85757474575388	0.420901991158332	-4.41331897870521	1.01797838938515e-05	0.000280157246272411
gene:HORVU5Hr1G008270::chr5H:19148322-19153683	779.06155461715	-1.85749660471866	0.23793262680024	-7.80681754200169	5.86500806907469e-15	1.6015280475372e-12
gene:HORVU7Hr1G060070::chr7H:273048060-273050932	28.1539562888742	-1.85492667586704	0.521648135556686	-3.5558963014169	0.000376692647764977	0.00518563317370838
gene:HORVU6Hr1G060700::chr6H:404560991-404563297	23.7683516440446	-1.85409251547282	0.572008525288068	-3.24137217105128	0.0011895577046951	0.0127545335537579
gene:HORVU7Hr1G073340::chr7H:414986076-414986955	80.3471293231094	-1.85274111905723	0.43413999190234	-4.26761218412241	1.97576418763787e-05	0.000478599283516981
gene:HORVU2Hr1G105510::chr2H:706917007-706957653	127.369409521661	-1.85225584135134	0.25364237092672	-7.30262784795714	2.82200943399611e-13	5.39414275992747e-11
gene:HORVU4Hr1G002270::chr4H:4190961-4197198	1285.01607596849	-1.85182139988833	0.209105146600918	-8.85593410774617	8.29858942018093e-19	4.47400361919806e-16
gene:HORVU4Hr1G010490::chr4H:31687064-31691152	58.7563200418033	-1.8494424754655	0.265214788562317	-6.97337612842406	3.09423891279132e-12	4.85518413286196e-10
gene:HORVU3Hr1G070700::chr3H:534569688-534573556	72.7300009864291	-1.84877974233295	0.555180160744984	-3.33005368897209	0.000868292399578525	0.0100643417825458
gene:HORVU5Hr1G063490::chr5H:492825131-492826715	26.2459891865764	-1.84877525889081	0.641989726968798	-2.87975832202165	0.00397980116466668	0.0323210889487376
gene:HORVU3Hr1G051830::chr3H:376035930-376039708	14.3351623493045	-1.84671616255744	0.516908401259113	-3.5726178140249	0.000353430391145202	0.00493769262738805
gene:HORVU7Hr1G011250::chr7H:15843353-15851182	47.6556875878995	-1.84484433312371	0.324956353804834	-5.67720652796256	1.369121351234e-08	8.91242895698022e-07
gene:HORVU1Hr1G016660::chr1H:54541480-54545758	284.229941141295	-1.8441376195242	0.20148995929192	-9.15250380716189	5.56289844475616e-20	3.44016184410126e-17
gene:HORVU2Hr1G007800::chr2H:16359541-16377235	25.3006096375046	-1.83651618142291	0.439871947198947	-4.17511549240099	2.97834914704883e-05	0.000668332648514928
gene:HORVU1Hr1G075880::chr1H:512631890-512635576	21.4963161966982	-1.83533111485379	0.375667650434653	-4.88551812414585	1.03157215574758e-06	3.97249746277448e-05
gene:HORVU6Hr1G011550::chr6H:21146527-21193375	21.0085146791363	-1.83465994886476	0.459934154044317	-3.98896218672201	6.63629982007303e-05	0.00125944442489469
gene:HORVU1Hr1G070760::chr1H:491094553-491097283	31.5976430335617	-1.83408039681225	0.466427259895332	-3.93218954917821	8.4175650428307e-05	0.00152381725357833
gene:HORVU1Hr1G066610::chr1H:473465419-473467310	236.32941037737	-1.83276463556672	0.269711726420959	-6.79527234461504	1.08108106013479e-11	1.42961071511912e-09
gene:HORVU6Hr1G076870::chr6H:527404378-527412181	63.4614732364916	-1.83130527094714	0.487734854581605	-3.7547147876444	0.000173538974793928	0.0027960386850706
gene:HORVU1Hr1G091340::chr1H:548076381-548078528	31.9746048122464	-1.83001983889644	0.419229104276063	-4.36520227300671	1.270051792138e-05	0.000335478756048914
gene:HORVU6Hr1G066050::chr6H:456267165-456269916	78.3095132996417	-1.82944032344528	0.426100576098377	-4.29344719548773	1.75920168645806e-05	0.00043670572207163
gene:HORVU7Hr1G039890::chr7H:106487356-106492556	319.334545900888	-1.82663365634026	0.24163671274284	-7.55942106481243	4.04867296311854e-14	9.25297801331853e-12
gene:HORVU2Hr1G116740::chr2H:738841166-738842118	364.628437119737	-1.81922254289015	0.496473004510983	-3.66429297536943	0.000248022757309791	0.00375032233215056
gene:HORVU2Hr1G010970::chr2H:21535802-21536769	8.37685246167017	-1.81866518681968	0.637870374730091	-2.85115167417711	0.00435611848886556	0.0345238399347483
gene:HORVU2Hr1G088380::chr2H:632608173-632608821	123.963741592193	-1.81824363859716	0.229152410620826	-7.93464765948187	2.11093739095756e-15	6.43254631627154e-13
gene:HORVU2Hr1G099530::chr2H:687957116-687962963	49.7704827705179	-1.81741556380569	0.302291718248087	-6.01212489160606	1.83107163467519e-09	1.45833758298033e-07
gene:HORVU2Hr1G073050::chr2H:525521663-525523258	11.286834566391	-1.81460681446988	0.510758920072995	-3.55276578275039	0.000381203710643526	0.0052336346521478
gene:HORVU2Hr1G003750::chr2H:8932828-8936993	14.6619449187557	-1.81295979259444	0.577651550037865	-3.13850069730723	0.00169814531050148	0.0169379522289394
gene:HORVU3Hr1G057910::chr3H:435730999-435731839	34.9369271908888	-1.8104065407565	0.488217035668349	-3.70820026441341	0.000208737548429534	0.00325587217602328
gene:HORVU7Hr1G108490::chr7H:625562650-625566343	52.8000511243759	-1.80986606738003	0.64594758058661	-2.80187761634841	0.00508061431423894	0.0388454532986138
gene:HORVU2Hr1G104030::chr2H:701642506-701647785	100.873489118907	-1.80530876692857	0.523555547656521	-3.44817044726063	0.000564397747679931	0.0071640811804869
gene:HORVU7Hr1G118770::chr7H:648324198-648325345	68.445204674527	-1.80290598678311	0.662987555114685	-2.71936625789489	0.00654071395226901	0.0468409576159429
gene:HORVU7Hr1G121470::chr7H:654094182-654099977	64.3869047260525	-1.80088326692351	0.397877706878041	-4.52622309768042	6.00471889446342e-06	0.000179594906792301
gene:HORVU3Hr1G050310::chr3H:359373854-359376902	36.7220987428418	-1.80033184415434	0.468038180774936	-3.84654910241193	0.00011979313217837	0.00206421790796221
gene:HORVU5Hr1G098640::chr5H:608357746-608360809	31.635200000886	-1.79823932743071	0.406494131267282	-4.42377684967932	9.69902029166881e-06	0.000270825498874673
gene:HORVU0Hr1G030650::chrUn:177757874-177758623	2466.95187790533	-1.79750399036608	0.245715756631303	-7.31537942462207	2.56655147903776e-13	4.99669549983777e-11
gene:HORVU4Hr1G084410::chr4H:628721752-628726337	95.2132023137244	-1.79648878990977	0.424337526716958	-4.23363166536072	2.29947452472154e-05	0.000542026360502187
gene:HORVU4Hr1G063790::chr4H:534228836-534232739	140.483996213949	-1.79619879422102	0.33806810375305	-5.31312707197334	1.07759838166513e-07	5.60831276556707e-06
gene:HORVU5Hr1G112930::chr5H:640501542-640623302	111.617793401086	-1.7937896061536	0.513700620712753	-3.49189690225552	0.000479603327586445	0.00628687005351159
gene:HORVU5Hr1G104570::chr5H:619597500-619598123	12.7532619419972	-1.7896682763479	0.454913475777323	-3.93408498899675	8.35142311893039e-05	0.00151644077962591
gene:HORVU2Hr1G125430::chr2H:760880860-760881813	188.920249164826	-1.78648795946524	0.507670636055832	-3.51899013373066	0.000433192817453676	0.00579777987255315
gene:HORVU2Hr1G108070::chr2H:713268428-713271355	118.006522754339	-1.78352044428834	0.444590058358997	-4.01160667170875	6.03069165092982e-05	0.00117567077825989
gene:HORVU7Hr1G035440::chr7H:78268477-78269747	46.7280947680741	-1.78031909385708	0.501120604995674	-3.55267589500226	0.000381333981122916	0.0052336346521478
gene:HORVU4Hr1G002050::chr4H:3622790-3625656	60.1169296675777	-1.7770855045429	0.562951689029681	-3.15672825781184	0.00159549958057611	0.0161283529717275
gene:HORVU4Hr1G063420::chr4H:531211599-531214578	27.8001452411231	-1.77610545572777	0.406564684978648	-4.36856795818616	1.25063901632303e-05	0.00033201939339909
gene:HORVU5Hr1G104600::chr5H:619642203-619657372	49.0804211848107	-1.77576829627764	0.370189450298986	-4.79691761838007	1.61125828583941e-06	5.88165220799642e-05
gene:HORVU2Hr1G008130::chr2H:16822071-16828312	68.8663454284127	-1.77459563817429	0.386508302204964	-4.59135192711391	4.40384029299452e-06	0.000139871821753025
gene:HORVU1Hr1G091170::chr1H:547517245-547518368	103.704833172984	-1.77276575701833	0.308359101028513	-5.74903011166325	8.97568334431128e-09	6.20798414465424e-07
gene:ENSRNA049480398::chr5H:636383932-636384036	18.3542989436616	-1.77167664213642	0.55997344003092	-3.16385834663622	0.00155692553028688	0.0158144522704406
gene:HORVU7Hr1G026300::chr7H:44707902-44711262	58.1812947463391	-1.77129956445554	0.374617482519879	-4.72828857996916	2.26420223641755e-06	7.9345193704859e-05
gene:HORVU7Hr1G092300::chr7H:565348808-565352486	28.262269196619	-1.7636332864285	0.397590312869339	-4.43580547448621	9.17286530859894e-06	0.000258190985245785
gene:HORVU4Hr1G000770::chr4H:1261511-1264915	24.4805039380414	-1.7627533097991	0.405437988553768	-4.34777539245148	1.37525333893118e-05	0.000354798487170148
gene:HORVU1Hr1G077270::chr1H:516830055-516831177	23.5491040739697	-1.76257931377137	0.580339913981682	-3.03714990354258	0.00238826653707639	0.0219954849796619
gene:HORVU2Hr1G027600::chr2H:91067153-91069435	29.7557992072696	-1.7603198514974	0.367617836291652	-4.78845060744235	1.68073918437253e-06	6.11405226481259e-05
gene:HORVU1Hr1G009630::chr1H:21743797-21750051	20.6721486241593	-1.75913254720104	0.394661355058895	-4.45732151033264	8.29900867309361e-06	0.000237731548175022
gene:HORVU1Hr1G084170::chr1H:533110463-533112073	9.84091698932836	-1.7580361007203	0.610885269483792	-2.8778498820341	0.00400395624324814	0.0324545813301987
gene:HORVU5Hr1G092700::chr5H:589119909-589124561	61.1288961619773	-1.75476624670907	0.481144954445552	-3.64706359382108	0.00026525429243989	0.00393039940298881
gene:HORVU4Hr1G061680::chr4H:517083645-517085704	29.0419668226706	-1.75422341647955	0.454164154772608	-3.86253163761429	0.000112218026859055	0.00194517414075721
gene:HORVU6Hr1G089540::chr6H:570019106-570021234	26.6009980867244	-1.75241220310884	0.450871541575537	-3.88672169679454	0.000101607130709544	0.00178777533916223
gene:ENSRNA049485133::chr6H:157614296-157614501	11.1921629017636	-1.75222708667794	0.586920168191366	-2.98546068382272	0.00283151534382019	0.0250043853923407
gene:HORVU7Hr1G101790::chr7H:610602535-610603130	114.873949631167	-1.74977521982755	0.342494790505736	-5.10891046618194	3.24021841830694e-07	1.46513618200692e-05
gene:HORVU5Hr1G104750::chr5H:619971869-619973316	18.5227640512814	-1.7493842042887	0.473636461344715	-3.69351675190286	0.000221173932788297	0.00343203181609353
gene:HORVU2Hr1G015940::chr2H:35768929-35771762	24.1320798207451	-1.74900287707791	0.398967376563955	-4.3838242919532	1.16613841763448e-05	0.000314349056015161
gene:HORVU5Hr1G050570::chr5H:394033655-394037400	64.7745692979866	-1.74812499020276	0.31374917774772	-5.57172771814687	2.52225404803491e-08	1.54614908495574e-06
gene:HORVU4Hr1G063690::chr4H:532859322-532862461	71.8758510808588	-1.74728214149613	0.358754951473755	-4.87040564685823	1.11369372848168e-06	4.24212397374201e-05
gene:HORVU4Hr1G013460::chr4H:46972575-46974016	51.1217184238414	-1.74628403796894	0.466876369582872	-3.74035644496025	0.000183759474915383	0.00293187951708926
gene:HORVU6Hr1G054210::chr6H:342689813-342691430	20.5046419624509	-1.74619176318928	0.437255552323382	-3.99352679208026	6.50977191876213e-05	0.00124771617469364
gene:HORVU5Hr1G098220::chr5H:606764430-606766699	14.1505154084988	-1.74275727290412	0.505280589065671	-3.4490881118681	0.000562483127912298	0.00715473094221656
gene:HORVU1Hr1G044080::chr1H:321693714-321696272	86.209379545897	-1.7415327880092	0.390088690002002	-4.46445342468213	8.02734074953713e-06	0.000230893114363567
gene:HORVU2Hr1G044610::chr2H:232318933-232325879	21.3493519956194	-1.74043633802021	0.585009286189038	-2.97505762576529	0.00292933513888759	0.0257062606970995
gene:HORVU4Hr1G076690::chr4H:601370023-601371982	57.9211696668011	-1.73956709891681	0.395485463499658	-4.39856141240528	1.08970792549886e-05	0.000298335922415873
gene:HORVU5Hr1G097500::chr5H:604590900-604592741	298.113102092836	-1.73686081353842	0.299096077216481	-5.80703307680398	6.35895778395859e-09	4.61046366777632e-07
gene:HORVU1Hr1G049760::chr1H:368411691-368418284	33.1453947338873	-1.7357772672756	0.32610903167013	-5.32268995552199	1.02243926323783e-07	5.37445198720967e-06
gene:HORVU1Hr1G069570::chr1H:486187475-486188709	18.9491461532492	-1.73419730401494	0.453960998302103	-3.82014602686388	0.000133372687663899	0.002257885773608
gene:HORVU4Hr1G051700::chr4H:425442873-425462173	17.9016093104937	-1.72814063448517	0.4495509478244	-3.84414857281138	0.000120971703281374	0.00208146565727837
gene:HORVU6Hr1G068760::chr6H:477076729-477083483	17.6998953412608	-1.7245663741392	0.569366645776599	-3.02892062071346	0.00245429160463446	0.0224072667299367
gene:HORVU7Hr1G041260::chr7H:113834053-113933170	28.4019231768152	-1.72176055172604	0.498495919472983	-3.45391102407881	0.000552519633967665	0.00705359916442266
gene:HORVU2Hr1G044520::chr2H:232003406-232008632	97.4769277891556	-1.71960630391284	0.470054305740646	-3.6583141201171	0.00025387976997161	0.00381486534552489
gene:HORVU0Hr1G002720::chrUn:11671002-11677399	57.1353426351803	-1.71497224025286	0.5195489949893	-3.30088645496885	0.00096379878809989	0.0108775272778252
gene:HORVU5Hr1G070050::chr5H:526807133-526808712	22.8099810685446	-1.71052680589722	0.440259650269243	-3.88526817038795	0.000102216993954312	0.00179550084785578
gene:HORVU1Hr1G074850::chr1H:509209856-509211822	107.053085973553	-1.70975998102521	0.314998133785044	-5.42784162077595	5.70396194841784e-08	3.19817343806489e-06
gene:HORVU2Hr1G033610::chr2H:133411929-133424743	159.635163216041	-1.70896534535755	0.578464978463445	-2.95431082085039	0.00313368215352751	0.0270416189316994
gene:HORVU3Hr1G028280::chr3H:125623792-125625123	60.685484630462	-1.7086408806198	0.353433328015569	-4.83440792132804	1.33542498853111e-06	4.96967182457614e-05
gene:HORVU3Hr1G049730::chr3H:351330808-351335750	202.579158543898	-1.70489287083276	0.219047494794771	-7.78321099919495	7.07065604628654e-15	1.8617588707342e-12
gene:HORVU5Hr1G040970::chr5H:307678605-307682437	1404.71494934668	-1.70232675488249	0.481809089955702	-3.53319767179777	0.000410565370133544	0.00557658105453999
gene:HORVU4Hr1G002760::chr4H:5278527-5279768	23.7309964592528	-1.69997308133711	0.543182315673969	-3.12965468919551	0.00175011899350301	0.0173248596786226
gene:HORVU2Hr1G012710::chr2H:26953672-26958611	21.7278773304995	-1.69949844690751	0.500918274841102	-3.39276591066001	0.000691907396183933	0.00840927451570137
gene:HORVU3Hr1G085020::chr3H:610811539-610813745	14.0705052520865	-1.69867951657724	0.574594648245485	-2.95630932478075	0.00311344671872052	0.0268843247260031
gene:HORVU7Hr1G084390::chr7H:508287932-508291409	44.3677966516108	-1.69743152181516	0.422960645467298	-4.01321385335931	5.98976015667506e-05	0.00117239992913643
gene:HORVU7Hr1G052500::chr7H:200169444-200174006	148.026163297621	-1.69613187468223	0.31548331137684	-5.37629666456818	7.60334757961133e-08	4.12030892291e-06
gene:HORVU3Hr1G003600::chr3H:9134486-9135345	32.9780155838416	-1.69540475206515	0.454503806761097	-3.73023223754056	0.000191303355117744	0.00303115625072019
gene:HORVU7Hr1G108530::chr7H:625594521-625596330	27.5338667610453	-1.69461431219886	0.387995696475907	-4.3676111039136	1.25612901246083e-05	0.000333056350769249
gene:HORVU0Hr1G039910::chrUn:249544113-249546000	41.8883569553781	-1.69240039369018	0.411513539196977	-4.11262384463147	3.91187494593989e-05	0.000830819016296285
gene:HORVU0Hr1G022030::chrUn:113613858-113615128	20.933392898229	-1.69195834262267	0.617150278629209	-2.74156619742728	0.00611470381769295	0.044626089021455
gene:HORVU4Hr1G053780::chr4H:448134976-448137568	15.7790452414857	-1.69174944087418	0.51114622296602	-3.30971719023472	0.000933902797259784	0.0106256711121127
gene:HORVU7Hr1G027410::chr7H:48614035-48615037	28.0833212895961	-1.69006152304314	0.496639726606989	-3.40299301988896	0.000666519832990833	0.00816681002824316
gene:HORVU2Hr1G088520::chr2H:633663345-633665499	59.5938438260602	-1.68887585264224	0.474301090437169	-3.56076738319446	0.000369772557947543	0.00511839223397304
gene:HORVU0Hr1G004670::chrUn:27150335-27151599	15.747334044215	-1.6866063823998	0.487941027534659	-3.45657833062622	0.00054708018121804	0.00699584209800491
gene:HORVU2Hr1G018340::chr2H:46669152-46706691	170.504311494791	-1.68373622237606	0.262437738708367	-6.41575495453838	1.40126688157948e-10	1.43024453650923e-08
gene:HORVU0Hr1G005330::chrUn:29773885-29776072	31.3751106583969	-1.68016484040418	0.420025117810298	-4.00015325074682	6.33014770721757e-05	0.00121772813990811
gene:HORVU7Hr1G036420::chr7H:84565659-84569896	18.058559919693	-1.67852177010107	0.622788217674331	-2.69517264852754	0.00703521677396857	0.0494228091845851
gene:HORVU2Hr1G003830::chr2H:9038913-9042521	47.8155620476529	-1.67017228297217	0.392409169314829	-4.25620095954536	2.07929827498228e-05	0.000499649434626027
gene:HORVU5Hr1G027240::chr5H:156234650-156236130	491.997971380588	-1.66987158312196	0.483235639845622	-3.4556051860236	0.000549058914027533	0.00701367723350115
gene:HORVU3Hr1G074380::chr3H:558528448-558529558	13.2865979025604	-1.66917822547093	0.590336640916755	-2.82750232626388	0.00469126745817042	0.0365328109538856
gene:HORVU4Hr1G000490::chr4H:721749-723458	86.5157381175098	-1.66870024951624	0.294372324669625	-5.66867232301483	1.4390828697223e-08	9.22504768865276e-07
gene:HORVU3Hr1G070540::chr3H:533238897-533242619	148.90559694443	-1.66817405791756	0.291069776485367	-5.73118266712732	9.97327908474623e-09	6.78634841540046e-07
gene:HORVU2Hr1G099890::chr2H:688685345-688686772	152.544725883268	-1.66671480937425	0.454466817082989	-3.66740705090884	0.000245022574798463	0.00371170364388507
gene:HORVU3Hr1G078260::chr3H:577355112-577357989	50.4583291319935	-1.66627363035157	0.458087640170689	-3.63745598927466	0.000275344221791905	0.00403160696893913
gene:HORVU0Hr1G020790::chrUn:109643441-109646321	63.1062872738689	-1.66522413300856	0.590168423236097	-2.82160831966842	0.00477834975777719	0.0370599712309197
gene:HORVU5Hr1G077790::chr5H:554038575-554044162	97.7726952768253	-1.66359991180423	0.398589266230566	-4.17371979816916	2.99666278555069e-05	0.000671009922566442
gene:HORVU6Hr1G026260::chr6H:98102267-98110802	371.973973824006	-1.66314716655583	0.32728312804248	-5.08167706811933	3.7411704443491e-07	1.66457739379169e-05
gene:HORVU5Hr1G115750::chr5H:647168574-647169509	131.644026085342	-1.66212767313494	0.489641625037372	-3.39458001146876	0.00068733952529406	0.0083731175311894
gene:HORVU7Hr1G119050::chr7H:648932669-648934784	14.8009662056098	-1.66137698141501	0.451631217871746	-3.67861413399196	0.000234504745091512	0.0035885711574193
gene:HORVU6Hr1G010300::chr6H:18081269-18081755	22.8438866544034	-1.65826555194913	0.567327207035685	-2.92294381687361	0.00346739075577706	0.0291971798281812
gene:HORVU7Hr1G035850::chr7H:81158940-81160763	82.0333747632151	-1.65455249633533	0.352349566948818	-4.69576991583381	2.65604380800013e-06	9.09543601091381e-05
gene:HORVU0Hr1G001280::chrUn:6663124-6664148	30.2606367053672	-1.65275803676229	0.407489360519016	-4.05595384050564	4.99301202348413e-05	0.0010094526039017
gene:HORVU7Hr1G091140::chr7H:556041359-556044066	14.9558074703773	-1.65251954357973	0.575766663463387	-2.87012022133999	0.00410315762346308	0.0330168358939666
gene:HORVU3Hr1G048520::chr3H:335443926-335450401	626.802596592652	-1.65129643043204	0.287961063297027	-5.73444344011451	9.78330643228471e-09	6.67869483913046e-07
gene:HORVU1Hr1G048860::chr1H:362735473-362737799	83.4750781139727	-1.65076574250685	0.543744681879287	-3.03592071337873	0.00239802413887875	0.0220467230188302
gene:HORVU5Hr1G011440::chr5H:30179248-30180905	14.3651778767932	-1.64158588965693	0.496228343876833	-3.30812600673287	0.000939225397673866	0.0106689104330042
gene:HORVU1Hr1G077370::chr1H:517111606-517113190	22.5514075324873	-1.64135210698695	0.355163617961359	-4.62139708005095	3.81164417896831e-06	0.000123678442140413
gene:HORVU7Hr1G040690::chr7H:110878331-110882213	69.1904718508245	-1.63947788851992	0.517142085221004	-3.17026584254748	0.001522995286638	0.0155600091821432
gene:HORVU6Hr1G053710::chr6H:336809018-336810586	213.364096010259	-1.63838383338172	0.244289478463494	-6.70673106220806	1.99032586653965e-11	2.4616818629331e-09
gene:HORVU7Hr1G041500::chr7H:115073992-115076322	84.9822280405101	-1.63771035851353	0.381758968934563	-4.28990669972773	1.78748195851615e-05	0.00044164037203009
gene:HORVU0Hr1G002930::chrUn:12061268-12062614	33.5583913558563	-1.63670763639052	0.334114479904925	-4.89864323406833	9.65006797066018e-07	3.75050515990945e-05
gene:HORVU3Hr1G098950::chr3H:660374356-660378157	52.32309810996	-1.63137521788061	0.455243741665113	-3.5835203618915	0.000338994324659199	0.00476131908502626
gene:HORVU4Hr1G002280::chr4H:4194801-4197705	184.962366908251	-1.62990130966868	0.473547014294214	-3.44189966459386	0.000577644463235658	0.00730351014277713
gene:HORVU5Hr1G045290::chr5H:350384128-350388890	14.3589905459249	-1.62896849866816	0.443053458393766	-3.67668611497532	0.000236283482349229	0.00361053524700209
gene:HORVU6Hr1G065960::chr6H:455226205-455228523	42.5777791336395	-1.62620147299764	0.508680369018372	-3.19690236156707	0.00138911938481231	0.0144235181160808
gene:HORVU2Hr1G089440::chr2H:638986924-639231515	1489.54466508926	-1.62563855400691	0.282257569196527	-5.75941526965759	8.44058151465698e-09	5.91572223090592e-07
gene:HORVU7Hr1G082280::chr7H:492902232-492903968	1544.0460858751	-1.62464473652686	0.258717981283683	-6.27959729921301	3.39451105175821e-10	3.17213286107858e-08
gene:HORVU4Hr1G058450::chr4H:489019630-489022880	10.487178703213	-1.62298439799703	0.56639396627965	-2.86546908092537	0.00416391933204823	0.0333313647351073
gene:HORVU7Hr1G108960::chr7H:626552818-626557891	187.012057274347	-1.62277505974436	0.502417706263879	-3.22993206551532	0.00123819635359487	0.0131287526629782
gene:HORVU3Hr1G062430::chr3H:476620677-476625391	163.645381524759	-1.62253661578929	0.507852587009639	-3.19489682103065	0.00139880839226217	0.0144669676614385
gene:HORVU2Hr1G078980::chr2H:572004792-572005237	21.9889362702044	-1.62145842191171	0.466533949216891	-3.47554218644418	0.000509821799399257	0.00660475240552605
gene:HORVU3Hr1G056270::chr3H:421520850-421529169	94.3544636305627	-1.62107612407367	0.447306708619291	-3.62408184996256	0.000289989766651058	0.00418170280624035
gene:HORVU1Hr1G029850::chr1H:167188887-167192229	54.0431243388139	-1.6190309088632	0.511918366942067	-3.16267399924415	0.00156327283273396	0.0158712576441643
gene:HORVU1Hr1G091420::chr1H:548346953-548356891	124.894092020261	-1.61423026405678	0.44588156966373	-3.62031170132056	0.000294248325446542	0.00423757896632807
gene:HORVU5Hr1G041680::chr5H:316508199-316534496	950.777267171769	-1.6127641758113	0.310308394400298	-5.19729470718355	2.02209655219865e-07	9.79645209827851e-06
gene:HORVU7Hr1G044280::chr7H:137524043-137525723	20.6101902657642	-1.61242828858753	0.443465793435462	-3.63596992700676	0.000276936640928916	0.00404365959178569
gene:HORVU3Hr1G099590::chr3H:661990946-662000628	126.35497220301	-1.61200478922146	0.222707391677418	-7.23821861986685	4.54616217987254e-13	8.10064457576271e-11
gene:HORVU1Hr1G039720::chr1H:279477857-279483376	57.0365067832629	-1.61189065060561	0.526639085479574	-3.06071215572193	0.00220811262442047	0.0207103847030706
gene:HORVU6Hr1G070600::chr6H:491980755-491983785	118.021488422908	-1.60678283145143	0.33329875951322	-4.82084851980284	1.42948877260767e-06	5.29162516423396e-05
gene:HORVU6Hr1G077520::chr6H:530750659-530751875	50.653802188958	-1.6062598133909	0.473406772731918	-3.39298021471378	0.000691366316826125	0.00840755822879474
gene:HORVU4Hr1G084590::chr4H:629355423-629360910	9.88068529697138	-1.60477456515192	0.531569987161859	-3.01893373198153	0.00253666010550846	0.0230292812514771
gene:HORVU2Hr1G088420::chr2H:632678455-632679755	295.140247892968	-1.60408929767226	0.15608388721972	-10.2770973112309	8.93789245677996e-25	1.1745507924766e-21
gene:HORVU3Hr1G091230::chr3H:634920941-634924075	119.61008804774	-1.60387880750749	0.457300403403337	-3.50727617026149	0.000452719035727053	0.006016985110744
gene:HORVU1Hr1G006920::chr1H:13601615-13602984	67.9500325317732	-1.60235407215733	0.464840934346066	-3.44710190898207	0.000566634798623933	0.00718580414708493
gene:HORVU3Hr1G080830::chr3H:590910968-590914623	193.267485063663	-1.59875846569675	0.589347594152045	-2.71275980687941	0.00667254523230532	0.0475340179819319
gene:HORVU0Hr1G025250::chrUn:128296478-128348970	21.2075879295691	-1.59796781315402	0.400447053588955	-3.99045965960404	6.59453652593946e-05	0.00125822799450457
gene:HORVU1Hr1G048760::chr1H:361646490-361651154	72.7975112672007	-1.59701899311837	0.284077643784388	-5.62176935799457	1.89011504132048e-08	1.18278448984537e-06
gene:HORVU6Hr1G076340::chr6H:525417843-525420339	62.3856255357172	-1.59693420402152	0.426444735959465	-3.74476237918275	0.000180564589289035	0.00289371269389577
gene:HORVU0Hr1G017160::chrUn:91702166-91704348	79.6529773048271	-1.59543004743935	0.392066392852422	-4.06928539789405	4.71575531996587e-05	0.000970190522090043
gene:HORVU1Hr1G090770::chr1H:547037025-547043705	29.1518772157072	-1.5950063260717	0.484194490084683	-3.29414390030076	0.000987219443442064	0.0110352344592306
gene:HORVU2Hr1G005150::chr2H:11269749-11323830	29.554408646473	-1.59292930711638	0.335194930518792	-4.75224760902842	2.01167803072029e-06	7.1569445471954e-05
gene:HORVU4Hr1G087760::chr4H:638201782-638202868	216.833365140512	-1.5888614187956	0.33746636878879	-4.70820670070985	2.49905620847284e-06	8.60882108934705e-05
gene:HORVU5Hr1G046050::chr5H:358046715-358047623	25.0631852134821	-1.58750955157128	0.454355959435904	-3.49397761513289	0.000475880918119692	0.00625758110343004
gene:HORVU7Hr1G112720::chr7H:635596139-635598704	289.102529002079	-1.58537888910319	0.523307847534065	-3.02953394751067	0.00244931375642477	0.0223812564287645
gene:HORVU7Hr1G024930::chr7H:40905914-40909739	976.417020497095	-1.58472351939533	0.408605343687579	-3.87837198871048	0.00010515783648992	0.00184254055836422
gene:HORVU3Hr1G028020::chr3H:122857868-122860212	117.468770926624	-1.58404577640689	0.557060405591223	-2.84357990714796	0.0044609821873576	0.0350903896264051
gene:HORVU4Hr1G056770::chr4H:477112484-477116943	232.992215321973	-1.58360714639056	0.237051688359878	-6.68042972968167	2.3824259927954e-11	2.79848541477744e-09
gene:HORVU2Hr1G028430::chr2H:96413281-96415679	625.714377973489	-1.58281090090162	0.220748591112365	-7.17019706864602	7.4889884370403e-13	1.29068418751811e-10
gene:HORVU7Hr1G108150::chr7H:624620901-624625229	65.762107506348	-1.58280292576058	0.367054648345816	-4.31217240510019	1.61658299054701e-05	0.000406582224392839
gene:HORVU5Hr1G061440::chr5H:480635984-480637440	17.8661557474187	-1.58232006080466	0.568475193910141	-2.78344609888955	0.0053784798437424	0.0405333036539525
gene:HORVU1Hr1G075640::chr1H:511720501-511726837	534.987374307601	-1.57377775935229	0.370593495463788	-4.24664161302332	2.16998645381232e-05	0.00051730311993036
gene:HORVU1Hr1G066450::chr1H:472921433-472924207	45.1320650517923	-1.57366729769104	0.31063278443606	-5.06600518856362	4.06250846728884e-07	1.77295236391663e-05
gene:HORVU1Hr1G066600::chr1H:473358628-473359929	187.202946743411	-1.57317509162527	0.361480860692797	-4.35202873150794	1.34883580425934e-05	0.000349172768666601
gene:HORVU7Hr1G107070::chr7H:621834267-621836472	370.455151553847	-1.57189362313307	0.385380923019904	-4.07880496734367	4.52677921949327e-05	0.000936811612884504
gene:HORVU1Hr1G051740::chr1H:383777298-383779191	65.9358594253705	-1.57178555705686	0.408210075917147	-3.85043302403902	0.000117909171608663	0.00203710619740654
gene:HORVU1Hr1G017410::chr1H:59216197-59224810	163.166094403858	-1.57008826174494	0.292598680907839	-5.36601278199022	8.04962396081555e-08	4.29572064467278e-06
gene:HORVU5Hr1G081840::chr5H:565803188-565885441	124.88949064816	-1.57005452037143	0.287282860461282	-5.46518688184333	4.62419368362335e-08	2.64927238124972e-06
gene:HORVU5Hr1G058170::chr5H:454854994-454857776	35.2227499037206	-1.56428361433358	0.434260858425239	-3.60217501528032	0.000315565784148815	0.00447711617915856
gene:HORVU5Hr1G094380::chr5H:595341024-595347727	60.5287996490684	-1.56421450182782	0.459227581190131	-3.40618587797801	0.000658773107509328	0.00809074962528688
gene:HORVU3Hr1G020640::chr3H:64537410-64538517	29.2234188911945	-1.56337505639653	0.536833852706919	-2.91221399044305	0.00358876685869756	0.0299791068617302
gene:HORVU2Hr1G121340::chr2H:751323587-751355315	18.0853867279413	-1.56281882625981	0.557122358463282	-2.80516264069988	0.00502911963327572	0.038521773919583
gene:HORVU6Hr1G054890::chr6H:348617623-348618731	38.449611054033	-1.55736440975095	0.502078511024937	-3.10183442540045	0.00192325497591526	0.0185248969395193
gene:HORVU7Hr1G025670::chr7H:42745030-42784940	28.1738403225362	-1.55680058961258	0.483739817894013	-3.21826017215244	0.00128970774817079	0.0135926792546562
gene:HORVU7Hr1G028370::chr7H:51814369-51817043	22.3161574019608	-1.55533078435949	0.505789955462129	-3.07505273199508	0.002104653388337	0.0199515068274002
gene:HORVU0Hr1G011480::chrUn:65523382-65526107	157.754397588362	-1.55304577093004	0.334629667977892	-4.6410881029014	3.46579305552879e-06	0.000114578246518158
gene:HORVU6Hr1G004000::chr6H:8756535-8761303	71.0482972681989	-1.55279644369895	0.487531194918764	-3.18501966619323	0.00144744171384813	0.0148966761993983
gene:HORVU4Hr1G067840::chr4H:563097542-563101396	232.676970326794	-1.55270789076253	0.257526324814746	-6.0293171654567	1.64653873049906e-09	1.32644150756603e-07
gene:HORVU4Hr1G056470::chr4H:473592711-473596716	187.842305301931	-1.55148972329018	0.455958746863338	-3.4026975772771	0.000667240920507925	0.00817088386406501
gene:HORVU4Hr1G067340::chr4H:558694617-558697361	8.7573465523429	-1.55052700556763	0.509132529366737	-3.04542907029765	0.00232348575768588	0.0215674803450679
gene:HORVU5Hr1G061580::chr5H:481044358-481050454	85.6003632145608	-1.54828120439809	0.549183375947565	-2.81924266503274	0.00481371114096497	0.0372243804523462
gene:HORVU1Hr1G048530::chr1H:360015411-360017377	76.3612566990004	-1.54693706579638	0.334686382844883	-4.62204961148162	3.79967110547691e-06	0.000123553779407055
gene:HORVU2Hr1G071570::chr2H:510425948-510431359	687.056977253353	-1.54248257973098	0.501068383148377	-3.07838736509189	0.00208124188779601	0.01975629432632
gene:HORVU4Hr1G054770::chr4H:458023417-458026275	199.746480227785	-1.54247035470007	0.364304461379286	-4.23401445280181	2.29556181585098e-05	0.000542026360502187
gene:HORVU4Hr1G058070::chr4H:485672689-485675800	38.8243245888531	-1.54021797476933	0.44307824842171	-3.47617600334872	0.000508618375518882	0.0065932243918989
gene:HORVU7Hr1G080950::chr7H:480933240-480935421	12.0690171572371	-1.53751905557603	0.563807862472142	-2.72702663072918	0.00639078810332259	0.0460969847891803
gene:HORVU2Hr1G088410::chr2H:632648053-632649593	137.432210768491	-1.53234096430028	0.224906220460947	-6.81324403193356	9.54220690200034e-12	1.27792638421312e-09
gene:ENSRNA049459548::chr4H:1793176-1793295	25.6674371299663	-1.53056777270636	0.386407071636743	-3.961024228214	7.46289591362467e-05	0.00138862698654754
gene:HORVU2Hr1G124860::chr2H:759290208-759292377	89.5931858478606	-1.52905200919912	0.555563913070332	-2.75225221297904	0.00591869181271224	0.0435736743886861
gene:HORVU3Hr1G086220::chr3H:616314744-616316606	76.9023161055995	-1.52741688244704	0.322602917294617	-4.73466543717623	2.1941673513765e-06	7.72773245059336e-05
gene:HORVU2Hr1G067750::chr2H:474749229-474752598	44.0723184386683	-1.52695394014127	0.440959218648767	-3.4628008114227	0.000534583984587262	0.00685375784142181
gene:HORVU7Hr1G036920::chr7H:87617932-87622629	18.5821715160669	-1.52676604127889	0.516925024371498	-2.9535541312499	0.00314137509660748	0.0270588090050262
gene:HORVU0Hr1G032410::chrUn:193189885-193191576	972.120782993694	-1.52527154527853	0.307434454197873	-4.96129020170532	7.0026478219155e-07	2.83694938542573e-05
gene:HORVU1Hr1G000990::chr1H:2511291-2816446	21.0962376259347	-1.52386419678478	0.478716249809001	-3.18323056172163	0.00145641591546398	0.014981703052126
gene:HORVU2Hr1G017910::chr2H:45628812-45630703	13.5789584793867	-1.52332935740599	0.557353254212699	-2.73314876318036	0.00627319915390696	0.0454358544299165
gene:HORVU0Hr1G012940::chrUn:74587317-74589417	181.366112512975	-1.52207700404498	0.438442288076	-3.47155610998257	0.000517451181153238	0.00669133358864982
gene:HORVU1Hr1G053740::chr1H:396909034-396909804	559.871572087508	-1.52127232178241	0.37606601360927	-4.04522681319192	5.22724903151886e-05	0.00105067579619958
gene:HORVU4Hr1G007360::chr4H:19143566-19145677	12.9492369911949	-1.52123902598218	0.565388475939785	-2.6906084766825	0.00713218434905631	0.0499447038590664
gene:HORVU4Hr1G053130::chr4H:442251679-442253726	71.5727330563811	-1.52028641041408	0.407151142545356	-3.7339608109898	0.00018849183616657	0.00299563820652932
gene:HORVU1Hr1G069620::chr1H:486467557-486655176	40.5179763477411	-1.5188338370597	0.465966134739721	-3.25953695735441	0.00111594240401059	0.0121702244588213
gene:HORVU5Hr1G107290::chr5H:626442882-626446428	37.0108627127355	-1.51616487004248	0.498075722795259	-3.04404491255583	0.00233420290208071	0.0215921470387809
gene:HORVU1Hr1G009800::chr1H:22031181-22032411	68.9165287971277	-1.51483846493983	0.296196570193539	-5.11430116813986	3.14904591808266e-07	1.43006132772367e-05
gene:HORVU6Hr1G081750::chr6H:546446375-546449672	186.404117767077	-1.51446919413807	0.26271380774805	-5.76471106379946	8.17978535834006e-09	5.75211260683806e-07
gene:HORVU3Hr1G054780::chr3H:408283725-408287016	18.7904787831109	-1.51421940394286	0.546070335005502	-2.77293840532027	0.00555526345484928	0.0415972113253779
gene:HORVU3Hr1G010140::chr3H:21656952-21664169	38.5906931995448	-1.51320611481353	0.471617039110691	-3.20854843935861	0.00133406834785138	0.0139275675679857
gene:HORVU2Hr1G094230::chr2H:663877025-663880165	102.225541832202	-1.51262352921134	0.287951281147107	-5.2530536526371	1.49597934363502e-07	7.48915754268331e-06
gene:HORVU6Hr1G022270::chr6H:70238435-70243944	83.8368427375478	-1.50753645462661	0.457665639205363	-3.29396905838097	0.000987833718094332	0.0110362336645332
gene:HORVU2Hr1G091190::chr2H:647278825-647282664	73.7556533959333	-1.50746524347013	0.230949765580803	-6.52724301182591	6.69913104779053e-11	7.29823468449968e-09
gene:HORVU4Hr1G053190::chr4H:442990726-442993097	35.6909459892195	-1.50567431375601	0.535941728344963	-2.80939929496751	0.00496340446792316	0.0381016949041812
gene:HORVU4Hr1G079180::chr4H:611470880-611475710	20.1192534127315	-1.50499863265879	0.446837997815419	-3.36810799443353	0.000756859430775328	0.00906248655551369
gene:HORVU6Hr1G012550::chr6H:24652738-24656296	29.3763934914646	-1.50342303404691	0.392501375349914	-3.83036373492097	0.000127953976063611	0.00218628627980638
gene:HORVU5Hr1G046850::chr5H:363428453-363429949	53.5050375313405	-1.49917916329847	0.334779942413742	-4.47810329522577	7.53091615691926e-06	0.000219011124640919
gene:HORVU4Hr1G049990::chr4H:406843458-406851562	32.9278643159452	-1.49594831734103	0.421328875274206	-3.55054781461975	0.000384430297311897	0.00527268847441614
gene:HORVU7Hr1G087420::chr7H:526375417-526377195	49.2750977072883	-1.49403965188274	0.294282710866192	-5.07688558218449	3.83671753390022e-07	1.69833311300602e-05
gene:HORVU1Hr1G065710::chr1H:468697122-468697732	111.035628933559	-1.49256492557297	0.356984766340336	-4.18103254341673	2.90188323443282e-05	0.000653265491297479
gene:HORVU6Hr1G066210::chr6H:458945384-458948474	25.5561069843768	-1.4923414348885	0.445984632639507	-3.34617232449526	0.00081935457577241	0.00960298177825568
gene:HORVU1Hr1G053770::chr1H:397039604-397044031	71.8778648290682	-1.49196904565311	0.476174711868249	-3.13323872197968	0.00172888766082833	0.0171713179110588
gene:HORVU2Hr1G092260::chr2H:651534345-651540462	12.5947166973577	-1.49179574127388	0.522232044315822	-2.85657641562055	0.00428236908357256	0.0340548760783649
gene:HORVU5Hr1G071720::chr5H:533642536-533643952	94.001887370993	-1.48882883656168	0.438195460770296	-3.39763637428944	0.000679707004380684	0.00829626351370568
gene:HORVU2Hr1G010010::chr2H:18942376-18944152	54.0538808392545	-1.48844187650556	0.315329010062472	-4.7202820831825	2.35517803400366e-06	8.18511956081999e-05
gene:HORVU4Hr1G016080::chr4H:64812122-64815900	118.743350072322	-1.48385396225154	0.24528118314317	-6.04960373737848	1.45202541373714e-09	1.20197977752902e-07
gene:HORVU4Hr1G071040::chr4H:578904596-578906428	52.1315281728335	-1.48357519026401	0.357128669337098	-4.15417556091987	3.26462459441681e-05	0.000719517785348091
gene:HORVU2Hr1G027210::chr2H:89154957-89155909	50.7948592749685	-1.48178011591267	0.352243920614497	-4.20668755142081	2.59141030071037e-05	0.000596790722702478
gene:HORVU0Hr1G020420::chrUn:107206241-107207384	17.9028688897391	-1.48057911442209	0.466261258261706	-3.17542812787389	0.00149615579497272	0.0153081127713365
gene:HORVU6Hr1G083310::chr6H:551081516-551082549	23.4667892572653	-1.47872359395373	0.543260603432848	-2.72194152237383	0.00648996255552654	0.046591242711724
gene:HORVU1Hr1G047930::chr1H:355089349-355090602	128.614220408855	-1.47633150750543	0.295099950675119	-5.00281855055525	5.64981144261601e-07	2.36639313530765e-05
gene:HORVU6Hr1G077010::chr6H:527832875-527836995	228.495625427816	-1.47581434309666	0.386601614244212	-3.81740346837871	0.000134863526792768	0.00227762290308815
gene:HORVU4Hr1G082600::chr4H:622694466-622695433	666.221197811974	-1.47579807946977	0.352284293196153	-4.18922474822923	2.7990907262624e-05	0.000637634687003177
gene:HORVU7Hr1G113370::chr7H:636764248-636767248	38.3590742767521	-1.47545650956871	0.292681543710956	-5.04116689717144	4.62701700735655e-07	1.9814187290566e-05
gene:HORVU5Hr1G089840::chr5H:585452850-585455740	102.894400146152	-1.47445475403708	0.36957914955614	-3.98955069788942	6.61985695794406e-05	0.0012584910705039
gene:HORVU6Hr1G076820::chr6H:527329046-527332110	270.535584613158	-1.47354232682767	0.229555027454693	-6.41912461324113	1.37060183792902e-10	1.4057694753315e-08
gene:HORVU6Hr1G054940::chr6H:348837290-348843489	532.21327956995	-1.47305611944363	0.50543845829153	-2.91441241812667	0.00356358784301545	0.0298280246764501
gene:HORVU5Hr1G092770::chr5H:589215453-589217249	36.5654168114232	-1.47290610281789	0.399069784272443	-3.69084847028243	0.000223507262094063	0.00345803067902117
gene:HORVU0Hr1G005420::chrUn:30337328-30339145	62.0732397171722	-1.47130737001269	0.37517049657789	-3.92170328806021	8.79252229750774e-05	0.00157874956300083
gene:HORVU2Hr1G118700::chr2H:743179633-743184903	18.800136743311	-1.46865567756824	0.428731329240037	-3.42558515649313	0.000613476590454635	0.00767338417067172
gene:HORVU2Hr1G000280::chr2H:766020-832979	567.979426792379	-1.46686936903801	0.211673906131776	-6.92985449101515	4.21273706548545e-12	6.23781757316176e-10
gene:HORVU0Hr1G022470::chrUn:114751385-114762008	69.9413322527544	-1.46485638148611	0.312483545504914	-4.68778725330698	2.76174898379098e-06	9.38102328484477e-05
gene:HORVU5Hr1G077010::chr5H:552490663-552492316	54.3956310426417	-1.46391050077276	0.354369443416857	-4.1310291504189	3.61142777657939e-05	0.000782823509591321
gene:HORVU7Hr1G121100::chr7H:653118360-653120859	43.3801638469728	-1.46365260576607	0.269882807073834	-5.42328954421186	5.85120969437395e-08	3.27200891047624e-06
gene:HORVU1Hr1G012240::chr1H:30599426-30603303	22.6737602222667	-1.46211261811235	0.401566873774604	-3.64101900231198	0.000271561090036777	0.00398732086530256
gene:HORVU5Hr1G118460::chr5H:652964038-652967879	195.229935806353	-1.46207494967045	0.276752078498488	-5.28297730446289	1.27101142435914e-07	6.4864772350911e-06
gene:HORVU2Hr1G034370::chr2H:139951205-139955315	38.9539466779836	-1.46206248373463	0.45820363197765	-3.19085747405412	0.00141851237878696	0.0146204123903798
gene:HORVU4Hr1G083020::chr4H:623466227-623471467	48.5242381245254	-1.45805778589686	0.332858900887718	-4.3804079807038	1.18457309324589e-05	0.000318094940722709
gene:HORVU1Hr1G070420::chr1H:489466282-489467882	87.5801892891453	-1.45786654194371	0.277956077105114	-5.24495293330965	1.56322227985248e-07	7.80719991833213e-06
gene:HORVU3Hr1G001680::chr3H:3691024-3694887	41.3141556320476	-1.45704565949848	0.435175153108724	-3.34818210343561	0.000813435426533897	0.00956492169348748
gene:HORVU2Hr1G095970::chr2H:672369458-672372814	33.6535817429087	-1.45618790342289	0.46665648599708	-3.12047072550922	0.00180562244213074	0.0177323762112289
gene:HORVU7Hr1G107340::chr7H:622819557-622821273	29.0917851455417	-1.45577978594405	0.399258862718505	-3.64620531159114	0.000266141364192562	0.00393799432448325
gene:HORVU2Hr1G018530::chr2H:47506525-47508021	86.7527039109405	-1.45484754470017	0.316176647977959	-4.60137569932611	4.19709598458457e-06	0.000134935994146598
gene:HORVU5Hr1G034100::chr5H:230000393-230001609	195.723101629485	-1.45410966729169	0.200395870077485	-7.25618580227945	3.98158070078836e-13	7.34357156269965e-11
gene:HORVU7Hr1G027770::chr7H:49730005-49732918	42.3523813330795	-1.45410286558586	0.354398156681176	-4.10302039717999	4.07791282792547e-05	0.000859140231662935
gene:HORVU4Hr1G086660::chr4H:634782749-634783854	46.1466687693299	-1.45373881690441	0.459101133409839	-3.16648927896822	0.00154291033418362	0.0157133425341756
gene:HORVU4Hr1G057020::chr4H:478924691-478925470	26.5693917264027	-1.45253226599882	0.424901831860558	-3.41851260004807	0.000629644024767106	0.00781978456276028
gene:HORVU3Hr1G096830::chr3H:654554165-654558872	35.5385634478772	-1.44840093881264	0.430480157408174	-3.36461719288793	0.000766499246527011	0.0091674705105102
gene:HORVU7Hr1G094870::chr7H:577876066-577880604	83.2511504157701	-1.44673275914794	0.326808397722058	-4.42685307119417	9.56178150923519e-06	0.000268061357350905
gene:HORVU7Hr1G119200::chr7H:649335567-649341930	18.9504868659304	-1.44266992826965	0.444237073638968	-3.24752258169725	0.00116414425870615	0.0125460262345236
gene:HORVU3Hr1G014890::chr3H:34669952-34674574	90.3926270906205	-1.44240863890729	0.257551444127184	-5.60046806879872	2.13773784717534e-08	1.32200223455026e-06
gene:HORVU7Hr1G080190::chr7H:473995737-473997247	33.6939461792164	-1.44174688332258	0.517673767475125	-2.78504914466591	0.00535196107678248	0.0404349024794928
gene:HORVU6Hr1G053760::chr6H:337183376-337254568	431.6884096756	-1.43787209707328	0.254208235619974	-5.65627660947544	1.54692090720921e-08	9.88618814437108e-07
gene:HORVU4Hr1G004540::chr4H:10104374-10108114	27.5885544619307	-1.4345346044319	0.489958487471876	-2.92786968919329	0.00341293053114967	0.0289183633697016
gene:HORVU3Hr1G078840::chr3H:580479630-580482592	37.4851470523741	-1.43376422135312	0.463108872746303	-3.09595498106241	0.00196180144042103	0.0188436898521209
gene:HORVU1Hr1G047030::chr1H:346845136-346944310	93.4084130891357	-1.43336591173115	0.439216246854151	-3.2634628659516	0.00110059606272714	0.0120463991748573
gene:HORVU4Hr1G082110::chr4H:621320127-621325419	97.58786069212	-1.43311605575692	0.358385748184232	-3.99880872221574	6.36621024450867e-05	0.00122354603840072
gene:HORVU2Hr1G077990::chr2H:564790272-564791715	22.6842629291774	-1.43137249757676	0.481222336115657	-2.97445149601855	0.00293512854553167	0.0257356183479353
gene:HORVU3Hr1G066450::chr3H:505746521-505758973	85.8013043260369	-1.4308778615862	0.283128824432587	-5.05380497536341	4.33093857751964e-07	1.86986272137429e-05
gene:HORVU7Hr1G030780::chr7H:62001400-62003683	61.2702169323028	-1.43002086706001	0.332461845402001	-4.30130821577698	1.69792693209287e-05	0.000423997763351361
gene:HORVU5Hr1G043460::chr5H:335387587-335388635	24.1993752709817	-1.42797023761749	0.381948941954016	-3.73864168941567	0.00018501720605026	0.00294486886783707
gene:HORVU4Hr1G072480::chr4H:585199482-585200969	517.110934248095	-1.42782136501335	0.418027363431209	-3.41561699046124	0.000636376867172236	0.00789407670157135
gene:HORVU2Hr1G113270::chr2H:727962872-727980078	92.3982199267526	-1.42754622489308	0.469393623755141	-3.04125610712972	0.00235593344722802	0.0217453277705954
gene:HORVU7Hr1G002820::chr7H:5190409-5291729	760.869957597336	-1.42616687235675	0.394344286764207	-3.61655264251237	0.000298552623040664	0.00429075013810869
gene:HORVU7Hr1G121120::chr7H:653151089-653152795	312.5047763541	-1.42521101707464	0.26047760188264	-5.47153001553193	4.46166756756608e-08	2.57016499385327e-06
gene:HORVU7Hr1G051420::chr7H:193186664-193190475	52.1352235789144	-1.42232308589684	0.499788387506682	-2.84585060687874	0.00442929694477733	0.0349064458624018
gene:HORVU6Hr1G032760::chr6H:144629212-144630752	108.140265812693	-1.42175726796779	0.33050437176017	-4.30178051925886	1.6943109670606e-05	0.000423597888150014
gene:HORVU3Hr1G000110::chr3H:252776-261511	27.0690304727069	-1.4205209281189	0.510092989191004	-2.78482739073089	0.00535562244332533	0.0404432247063054
gene:HORVU5Hr1G075570::chr5H:547429196-547432933	201.217194142905	-1.41921927723201	0.227104627508482	-6.249186961983	4.12594789602747e-10	3.75550564770015e-08
gene:HORVU5Hr1G102070::chr5H:613673900-613753430	33.7275258199187	-1.41916051786156	0.522953088350503	-2.71374344941316	0.00665276655888275	0.0474333908670969
gene:HORVU2Hr1G116300::chr2H:737521033-737662117	132.203679272489	-1.41896962661235	0.181080581128923	-7.83612255806763	4.64672346632902e-15	1.320297400041e-12
gene:HORVU3Hr1G108690::chr3H:676045177-676047350	33.7147157409519	-1.41692998851641	0.436305706498383	-3.24756235688076	0.00116398155332793	0.0125460262345236
gene:HORVU2Hr1G040910::chr2H:199072666-199076853	29.0695375890579	-1.41636456529884	0.430841102815594	-3.28744067370255	0.0010110248895616	0.0112475181629218
gene:HORVU2Hr1G071780::chr2H:512543635-512545878	37.4701380762641	-1.41536463373543	0.339201115274005	-4.17264145075733	3.01088558597328e-05	0.000672047561896754
gene:HORVU6Hr1G071190::chr6H:495778402-495780873	1035.11096960154	-1.41105396619255	0.250896734425035	-5.62404277371795	1.86539428824186e-08	1.17430479953812e-06
gene:HORVU7Hr1G086170::chr7H:520945812-520956455	43.6211151515957	-1.40916057451218	0.260103931191403	-5.41768272420003	6.03764332675144e-08	3.36730738960943e-06
gene:HORVU1Hr1G017380::chr1H:58852495-58857986	199.126109596974	-1.40894824746783	0.221946668553653	-6.3481387517526	2.17935483815332e-10	2.11166427774247e-08
gene:HORVU4Hr1G050990::chr4H:416421399-416424678	104.08234975533	-1.40872400927857	0.324330456541452	-4.34348357012387	1.40240970432867e-05	0.000360037441309092
gene:HORVU2Hr1G036530::chr2H:162572049-162574997	48.2011366210715	-1.40612428992737	0.381071117309956	-3.68992617402608	0.000224319141302509	0.00346549174505992
gene:HORVU3Hr1G092270::chr3H:637657561-637660569	48.0859468502021	-1.4054402642763	0.475054618590109	-2.95848142356227	0.00309158874838548	0.0267725473737863
gene:HORVU2Hr1G089990::chr2H:641034485-641035375	45.071505608976	-1.40542018396507	0.433267054248178	-3.2437734883946	0.00117957509634339	0.0126733500131406
gene:HORVU3Hr1G061560::chr3H:468266162-468274680	40.083597695529	-1.40337508637251	0.35779679080326	-3.92226851230809	8.7719156261542e-05	0.00157639570902152
gene:HORVU7Hr1G077620::chr7H:455899987-455901320	24.0678855534801	-1.40315846656573	0.346203233259782	-4.05299064758541	5.05670246827352e-05	0.00101938855319194
gene:HORVU3Hr1G024970::chr3H:98539814-98542146	10.1226748086764	-1.40301849768123	0.489550800156486	-2.8659303533622	0.00415785708752681	0.0333313647351073
gene:HORVU6Hr1G018070::chr6H:44280073-44296135	38.1120913519017	-1.39991493671559	0.479007023685049	-2.92253530218807	0.00347194260374337	0.0292004260745232
gene:HORVU4Hr1G078210::chr4H:606747309-606749312	47.3644513851906	-1.39860460424046	0.433771757903951	-3.22428691761474	0.00126286800798167	0.0133499561266076
gene:HORVU6Hr1G070740::chr6H:492839206-492840526	264.621219086419	-1.39855751044135	0.204777279463168	-6.82965177634808	8.51209971675105e-12	1.16977391270855e-09
gene:HORVU7Hr1G116770::chr7H:644113771-644114977	50.9220035366704	-1.39656578518411	0.318352206581743	-4.38685756313587	1.15000044229187e-05	0.000310795749352555
gene:HORVU5Hr1G044350::chr5H:342480916-342482766	131.375469766464	-1.39532279701528	0.198740289281719	-7.02083509115442	2.20546041126814e-12	3.51303110661544e-10
gene:HORVU3Hr1G052470::chr3H:381156059-381160615	17.5142482597666	-1.39484257217777	0.508691176508751	-2.74202234399042	0.00610621877474193	0.0445796374853208
gene:HORVU2Hr1G106400::chr2H:709347557-709349680	11.0704223442282	-1.39452194086919	0.496228856328895	-2.81023951566597	0.00495046436945647	0.0380162395296537
gene:HORVU3Hr1G080770::chr3H:590593750-590597816	69.4903688179597	-1.39330032331787	0.398382166155958	-3.49739632364071	0.000469823288651566	0.00620654272397511
gene:HORVU7Hr1G106710::chr7H:620483181-620487210	24.5632018740318	-1.39253273903997	0.389685084930324	-3.57348226270695	0.000352265115496524	0.00492544735696006
gene:HORVU2Hr1G111140::chr2H:722219440-722225304	25.8921895998281	-1.39103986466686	0.397930699007649	-3.49568371612396	0.000472848818750966	0.00622939803449738
gene:ENSRNA049478581::chr5H:629289965-629290184	112.653581627366	-1.38792051758446	0.377750772172081	-3.67416990203319	0.000238623917031592	0.00364100615348784
gene:HORVU4Hr1G089360::chr4H:642223609-642225409	123.064234031551	-1.38764899846068	0.271962120133107	-5.10236130598452	3.3544156463141e-07	1.50383674582943e-05
gene:HORVU3Hr1G109540::chr3H:678598393-678604825	41.0591358190938	-1.38739659267823	0.496748589805129	-2.79295527184586	0.00522289132457599	0.0396956455377788
gene:HORVU1Hr1G000810::chr1H:2199701-2206634	2550.14243675694	-1.38735166501033	0.221641730467316	-6.25943346537313	3.86378535269946e-10	3.57885245928894e-08
gene:HORVU6Hr1G076660::chr6H:526683262-526685436	171.899998873211	-1.38645737317558	0.37673908332093	-3.68015274909639	0.000233094284041031	0.00357407416221613
gene:HORVU5Hr1G118060::chr5H:651910576-651919291	49.7308401354321	-1.38603860532605	0.342786576140428	-4.04344481902416	5.26715568658627e-05	0.00105610955259596
gene:HORVU5Hr1G034040::chr5H:229928151-229928512	59.2831985220556	-1.38387514661202	0.272178998291067	-5.08443030248835	3.68731135852675e-07	1.64605963109094e-05
gene:HORVU2Hr1G037550::chr2H:172678683-172682129	782.700062767667	-1.38277002102084	0.23151774367889	-5.97263086210237	2.33457742480282e-09	1.83159794529492e-07
gene:HORVU3Hr1G023910::chr3H:89345675-89357738	66.0808924911414	-1.38243379203331	0.412546172170239	-3.35097956371981	0.000805262448567806	0.0094907221096338
gene:HORVU1Hr1G001690::chr1H:3787482-3789368	41.4481099824	-1.38156830240442	0.463298749027799	-2.98202467695747	0.00286348916962892	0.0252443284195462
gene:HORVU4Hr1G030810::chr4H:201065559-201071113	150.73519509213	-1.37858989668462	0.241901929378578	-5.69896197283783	1.20539106503627e-08	8.02719773364102e-07
gene:HORVU1Hr1G088560::chr1H:541996169-542000680	351.332670483978	-1.37716253228031	0.32295537562601	-4.26425022221987	2.00574574385446e-05	0.00048474494264694
gene:HORVU2Hr1G101660::chr2H:694124875-694126711	81.0874887993928	-1.37600663251772	0.500392371116576	-2.7498553374171	0.00596215798998203	0.0438322845794973
gene:HORVU7Hr1G056700::chr7H:239028874-239032043	241.70125432626	-1.37576100434725	0.271074064922003	-5.07522180236278	3.87044250773993e-07	1.70966227243151e-05
gene:HORVU2Hr1G082440::chr2H:598231107-598235395	426.127892716771	-1.37532887729375	0.201486646584129	-6.82590583847698	8.7372226745135e-12	1.17897871983113e-09
gene:HORVU6Hr1G089600::chr6H:570135623-570137778	78.6248500016847	-1.37485630228436	0.453057328023223	-3.0346188379363	0.00240839851647599	0.0221254895925808
gene:HORVU3Hr1G098160::chr3H:657602653-657604707	143.156433696771	-1.37020603374829	0.363556565185335	-3.76889366046734	0.000163972721693601	0.00266849105753069
gene:HORVU5Hr1G077120::chr5H:552902648-552912028	28.1987654393774	-1.36772817405504	0.412621428244749	-3.31472890264865	0.000917320407697724	0.0104994985804313
gene:HORVU7Hr1G038400::chr7H:97470225-97471753	43.3335316688779	-1.36741784577572	0.311627016533371	-4.38799517765586	1.14400311713717e-05	0.000309971772434614
gene:HORVU5Hr1G094700::chr5H:596724562-596725585	160.80332959892	-1.36627545841437	0.483841769877636	-2.8238063422261	0.00474570497307095	0.0368475601047968
gene:HORVU3Hr1G062690::chr3H:479145963-479147613	100.117295484806	-1.36432236525303	0.246249036419727	-5.54041707163299	3.01752110260221e-08	1.81275424866612e-06
gene:HORVU2Hr1G107760::chr2H:712498014-712503852	76.3854931253677	-1.36398173237146	0.305284411081816	-4.46790495308296	7.89893855479692e-06	0.000227702507419093
gene:HORVU1Hr1G026520::chr1H:133885999-133888304	107.314584941776	-1.36331548419393	0.387069147706207	-3.5221497044469	0.000428062340863886	0.00575107909201538
gene:HORVU2Hr1G077510::chr2H:560044873-560046806	69.3218029347319	-1.36308403007411	0.335598773655027	-4.06164782793653	4.87275471419308e-05	0.000992776556401393
gene:HORVU3Hr1G082150::chr3H:597790976-597792942	95.8299611226607	-1.3614295020095	0.338976917658748	-4.01628969728276	5.91215735943347e-05	0.00116176654803223
gene:HORVU2Hr1G087370::chr2H:627204796-627207193	424.075655551377	-1.35917019522505	0.30609681328632	-4.44032781861632	8.98219461360705e-06	0.000253527439710562
gene:HORVU7Hr1G088560::chr7H:537880103-537888693	147.097426370364	-1.35848975948755	0.233751844683712	-5.81167503223646	6.18508179673129e-09	4.51012595567775e-07
gene:HORVU1Hr1G009490::chr1H:21102771-21103759	79.9361355057262	-1.35749669463991	0.342771498538133	-3.96035463983854	7.48385373411698e-05	0.00139081804937073
gene:HORVU4Hr1G060130::chr4H:504126933-504128719	77.5756852805934	-1.35601814166219	0.326658069174889	-4.15118519829429	3.30757979204684e-05	0.000726324775438985
gene:HORVU4Hr1G059170::chr4H:494939585-494941181	286.571226224849	-1.3542933313643	0.204824713783437	-6.61196252321487	3.79258028330311e-11	4.26432048324766e-09
gene:HORVU3Hr1G097790::chr3H:656846800-656847708	12.9309949035581	-1.35231389179847	0.4848234844981	-2.78929122667895	0.00528235413025349	0.0400398849104801
gene:HORVU3Hr1G078660::chr3H:579747331-579754072	118.052037856643	-1.35147917952682	0.409354274895366	-3.30149032857242	0.000961726504247964	0.0108599685705251
gene:HORVU0Hr1G015370::chrUn:83968867-83969979	23.1813159501598	-1.3493805128928	0.42211212705887	-3.19673476878007	0.00138992666969294	0.0144247769777709
gene:HORVU5Hr1G109610::chr5H:630341889-630342997	29.5212784371169	-1.34923538905839	0.415883259963939	-3.24426472269017	0.00117754252846396	0.0126579801653799
gene:HORVU7Hr1G118560::chr7H:647912448-647914297	50.9138970408798	-1.34893314098968	0.483667208414093	-2.78896960042573	0.00528760279973183	0.0400494007446547
gene:HORVU2Hr1G078510::chr2H:568619651-568624549	175.782863925911	-1.34851946751655	0.377168052683392	-3.57538094205595	0.000349718300340289	0.00489885208724512
gene:HORVU7Hr1G108210::chr7H:624766089-624778391	1391.72120714348	-1.34820980364642	0.25096903318538	-5.37201656528897	7.7860954083955e-08	4.20849465441963e-06
gene:HORVU3Hr1G108970::chr3H:676735661-676737843	27.9711613950703	-1.34811129010179	0.368973003427216	-3.65368543925928	0.000258502935670789	0.00386852863018791
gene:HORVU3Hr1G022340::chr3H:78791709-78794107	116.409058340832	-1.34761265022946	0.455125202965466	-2.96097126999076	0.00306670544728027	0.0266338491261937
gene:HORVU7Hr1G008760::chr7H:11417339-11419274	88.0896701236899	-1.34675854855668	0.376484237616995	-3.57719769911525	0.000347297505405561	0.00486818489910489
gene:HORVU1Hr1G050110::chr1H:371701308-371703105	40.119796113254	-1.34405537626789	0.328774844518609	-4.08807242608799	4.34972365390638e-05	0.000908215387756063
gene:HORVU3Hr1G065650::chr3H:499674856-499676337	53.6800928813588	-1.34365045172944	0.26854832594615	-5.00338420280778	5.63325099561178e-07	2.36416637592282e-05
gene:HORVU6Hr1G074650::chr6H:515252840-515254676	73.2926216856227	-1.34346691881447	0.269460504597027	-4.98576561646242	6.17169263297397e-07	2.53677582907328e-05
gene:HORVU5Hr1G095010::chr5H:597479389-597481209	35.0514939053833	-1.34161843682652	0.309225279400556	-4.33864410900458	1.43364464220617e-05	0.000367159710682422
gene:HORVU5Hr1G085500::chr5H:575063824-575065155	17.135963597189	-1.3415250826807	0.446629151107214	-3.00366664234745	0.00266747422459409	0.0238915852565922
gene:HORVU7Hr1G082330::chr7H:493519918-493526417	74.04787991312	-1.34125589330643	0.24991086140786	-5.36693717812236	8.00849350187311e-08	4.28464591273242e-06
gene:HORVU3Hr1G066280::chr3H:504136945-504138137	23.5915293619907	-1.33701585188016	0.417756740499583	-3.20046506079414	0.00137206003321845	0.0142745839972544
gene:HORVU6Hr1G026600::chr6H:102141372-102144774	422.476710504611	-1.33676576108812	0.277783713971785	-4.81225390061527	1.49237587418241e-06	5.47621206467004e-05
gene:HORVU2Hr1G086380::chr2H:622777431-622782699	520.58505092218	-1.33380755962322	0.354162449690324	-3.76608971614435	0.000165824226191119	0.00269445145277779
gene:HORVU2Hr1G076970::chr2H:556516131-556523969	115.6921230088	-1.3333597880588	0.287793708893864	-4.63304007993634	3.6033474326298e-06	0.000118301962522316
gene:HORVU3Hr1G003040::chr3H:7737139-7740623	70.8317077252582	-1.33267608056094	0.365693333987876	-3.64424493612761	0.000268177937837688	0.0039542141100808
gene:HORVU3Hr1G086970::chr3H:619481299-619508460	21.4774706818234	-1.33157390233156	0.420352196302205	-3.16775768996875	0.00153619499805446	0.0156720213629758
gene:HORVU4Hr1G084600::chr4H:629483971-629487192	47.6798356725968	-1.32988551438238	0.398667765681533	-3.33582403410244	0.000850469767469708	0.00990691264865267
gene:HORVU5Hr1G055140::chr5H:432271989-432272697	59.7423881654166	-1.32983160058735	0.317421439989254	-4.18948260278943	2.79591215287524e-05	0.000637601398333566
gene:HORVU3Hr1G085180::chr3H:611456568-611458623	98.3121169206652	-1.32982560869443	0.260472282735664	-5.10543999049597	3.30025710600912e-07	1.48271807502025e-05
gene:HORVU3Hr1G103960::chr3H:666089932-666092437	31.5461080901664	-1.32940376667368	0.450308418157821	-2.95220722746461	0.00315511110620871	0.0271326650794047
gene:HORVU3Hr1G069030::chr3H:523493174-523500276	145.992648558713	-1.32512792672501	0.205378839308805	-6.45211517985337	1.10299694268817e-10	1.14244402546608e-08
gene:HORVU1Hr1G078280::chr1H:519645670-519650607	129.428996494346	-1.32406062084944	0.430373608576566	-3.07653767439107	0.00209419836443981	0.0198613508392925
gene:HORVU3Hr1G062520::chr3H:477214232-477215439	146.880355248834	-1.31804273296796	0.320319943516866	-4.11476949732466	3.87566510944754e-05	0.000824794884526762
gene:HORVU2Hr1G112070::chr2H:724912317-724915636	120.028756552069	-1.31569000432924	0.383961559027053	-3.42661908047034	0.000611145729303931	0.00764877982401456
gene:HORVU2Hr1G082420::chr2H:598003777-598007248	922.411030821262	-1.3147171294832	0.225160369228801	-5.83902546432239	5.25070448324796e-09	3.87373026192181e-07
gene:HORVU1Hr1G051500::chr1H:381785299-381787773	24.8825183899666	-1.3142064794386	0.2937246250734	-4.47428089868252	7.66688972887898e-06	0.000222657490938411
gene:HORVU4Hr1G079010::chr4H:609995680-609997877	27.7817537986359	-1.31113681980762	0.421573627756606	-3.11010161329305	0.00187022993371495	0.0182147577927337
gene:HORVU7Hr1G074640::chr7H:427238721-427242968	40.1848136829191	-1.31112767583864	0.309921963682888	-4.23050906188817	2.33163050038026e-05	0.000546542507257473
gene:HORVU4Hr1G011600::chr4H:36210872-36219629	87.883611586497	-1.30816790126878	0.332487020834632	-3.93449313595739	8.33724512516813e-05	0.00151642660901198
gene:HORVU6Hr1G072360::chr6H:503174913-503176350	39.2121695078911	-1.30607089051299	0.357828021889772	-3.64999611717195	0.000262244272964502	0.00390229871433236
gene:HORVU5Hr1G084100::chr5H:571057518-571061886	272.627345927908	-1.30491745470142	0.376109969758525	-3.46951040819052	0.000521407864779185	0.00672584157352585
gene:HORVU1Hr1G075620::chr1H:511566378-511571516	445.06526702715	-1.30442472220767	0.408349362936743	-3.19438412448248	0.00140129527252691	0.0144784444226785
gene:HORVU0Hr1G016780::chrUn:90504292-90506956	61.1345945659591	-1.3035032621573	0.395027972434422	-3.29977458083349	0.000967625173791527	0.0109148534893458
gene:HORVU7Hr1G029060::chr7H:54080026-54083868	149.197054744198	-1.30168499503704	0.395099011978986	-3.29457922083154	0.00098569156170369	0.0110260449592638
gene:HORVU3Hr1G019070::chr3H:51060146-51062528	131.028685122208	-1.29975914300956	0.30085216729387	-4.32025853328809	1.55846506311531e-05	0.000395110408771401
gene:HORVU7Hr1G038980::chr7H:101574323-101577995	34.0951382832266	-1.29945720271415	0.389910852117321	-3.33270334913161	0.00086006593083129	0.00999654298599155
gene:HORVU5Hr1G076740::chr5H:551861951-551862732	123.366685936173	-1.29933817483749	0.359802815654965	-3.61125071373398	0.000304723901717032	0.00435562526002876
gene:HORVU2Hr1G105090::chr2H:705627580-705628787	41.1550270380958	-1.29767839298199	0.438748012214128	-2.95768495094325	0.00309958740442894	0.0268197221257296
gene:HORVU2Hr1G076920::chr2H:556101906-556107213	245.21632641306	-1.29660846877679	0.174153775819255	-7.44519297774213	9.68028094078637e-14	2.13383735528864e-11
gene:HORVU7Hr1G057350::chr7H:248978164-248980455	50.8538175967723	-1.29638116155634	0.299484302941054	-4.32871155124113	1.49984219253086e-05	0.000381326262879732
gene:HORVU4Hr1G014900::chr4H:55850295-55851723	45.5973704136123	-1.29513579944616	0.376763814206148	-3.43752704111208	0.000587052099693464	0.00741342789678965
gene:HORVU3Hr1G074230::chr3H:557551443-557555429	193.450100333936	-1.29309790235754	0.367084311766465	-3.52261826754448	0.000427306341654116	0.00574459280026819
gene:HORVU6Hr1G062820::chr6H:420596475-420599923	61.051957765406	-1.29302213011257	0.474520346250246	-2.72490345320341	0.00643202924030642	0.0463227781131714
gene:HORVU1Hr1G037570::chr1H:257467731-257469352	51.260010580057	-1.29186791087863	0.284233097656252	-4.54510020659523	5.49091251842374e-06	0.000167451901648302
gene:HORVU6Hr1G064340::chr6H:435426996-435428359	72.6767318156212	-1.2917910946664	0.29379524163864	-4.39690951923337	1.0980308990669e-05	0.000300223636980242
gene:HORVU3Hr1G070560::chr3H:533394686-533396192	29.1742769586387	-1.29105580019942	0.445859519217338	-2.89565601843769	0.00378366893438034	0.0311249698803916
gene:HORVU4Hr1G015740::chr4H:62854558-62861990	206.810790486622	-1.29081020629081	0.222120897745908	-5.81129564750552	6.19911728902725e-09	4.51012595567775e-07
gene:HORVU3Hr1G019320::chr3H:52963658-52967833	116.009079290221	-1.29018673939917	0.27723349944109	-4.6537909091081	3.25887276637444e-06	0.000108763585374268
gene:HORVU1Hr1G060610::chr1H:440058090-440062775	119.727001756172	-1.28931454788445	0.467593626639836	-2.75733986613454	0.00582737480287682	0.0429917131948379
gene:HORVU7Hr1G045800::chr7H:147022803-147028855	75.3760049100379	-1.2869663982903	0.261181557289682	-4.92747807940704	8.3297765268405e-07	3.29214062506294e-05
gene:HORVU7Hr1G009770::chr7H:13443488-13449845	76.0927717445292	-1.28689702044345	0.2620140083684	-4.91155808216953	9.03555134490966e-07	3.53783058804601e-05
gene:HORVU5Hr1G107410::chr5H:626696991-626699937	139.528315811935	-1.28653942535555	0.393932670078076	-3.26588659199189	0.00109121941991798	0.0119686904137691
gene:HORVU3Hr1G081600::chr3H:595386938-595393791	26.7225885998073	-1.28650246061576	0.39551145136732	-3.25275654135474	0.00114291374752088	0.0123934525298474
gene:HORVU3Hr1G109330::chr3H:677551644-677552687	13.0450786262008	-1.28524889621124	0.475446578614944	-2.70324565160483	0.00686659780985181	0.048579100117747
gene:HORVU1Hr1G073760::chr1H:504458479-504461429	38.9769405151008	-1.28325337243984	0.322455218006967	-3.97963283202975	6.9021786240768e-05	0.00129924089301557
gene:HORVU5Hr1G076660::chr5H:551799585-551800253	97.0294058733113	-1.28317470176228	0.416490986966151	-3.08091829575791	0.00206363267005727	0.019606841627033
gene:HORVU7Hr1G098470::chr7H:597908202-597911103	34.9337507363101	-1.28143147206803	0.353054691195327	-3.62955514832426	0.000283910072991495	0.0041150830639221
gene:HORVU3Hr1G070550::chr3H:533296419-533300957	82.0138955900711	-1.28105298010741	0.398183924463406	-3.21723932434933	0.00129430583850656	0.0136206579381577
gene:HORVU5Hr1G055920::chr5H:437938269-437945041	130.859176570937	-1.27895032588586	0.207113295092772	-6.17512422518788	6.6111468328975e-10	5.89008361476707e-08
gene:HORVU2Hr1G000260::chr2H:761022-766626	76.8169990447311	-1.27836455617342	0.274919479130634	-4.6499599090466	3.31999558732389e-06	0.00011027840003013
gene:HORVU0Hr1G012460::chrUn:70965395-70969497	70.2738014805142	-1.27729752218649	0.352323359060873	-3.62535576860744	0.000288563915091294	0.00416427239444719
gene:HORVU7Hr1G074050::chr7H:422573422-422576873	49.624979000807	-1.27647309679019	0.267388291922037	-4.77385560756853	1.80731983859724e-06	6.54056917837275e-05
gene:HORVU2Hr1G027470::chr2H:90729377-90734367	160.009522875992	-1.27557361287745	0.458499108095997	-2.78206345520389	0.00540144779383015	0.040662671433252
gene:ENSRNA049488423::chr3H:532634114-532634309	52.0514538361726	-1.27508776414567	0.376646211455229	-3.38537259997697	0.00071081696780719	0.00860923822875229
gene:HORVU1Hr1G027700::chr1H:143405693-143407012	41.9028155833627	-1.27466124832714	0.376974580912793	-3.38129230156771	0.00072145751661665	0.00871301880780109
gene:HORVU1Hr1G085480::chr1H:535618017-535620617	26.0162162202645	-1.27419162464393	0.453127225185313	-2.8119952936459	0.00492352237143996	0.037844450923861
gene:HORVU2Hr1G097780::chr2H:680440770-680447491	438.406105703595	-1.27409747388269	0.303546605385971	-4.19737019382123	2.70032337815031e-05	0.000618485831688327
gene:HORVU5Hr1G093250::chr5H:590973111-591085223	77.8745759141023	-1.27149106582602	0.341945475246231	-3.71840295564791	0.00020048628359576	0.0031505415537253
gene:HORVU2Hr1G071100::chr2H:504798203-504801828	59.7565092629103	-1.26957211043484	0.384848490098668	-3.2988881159683	0.000970685914013492	0.0109435077898379
gene:HORVU5Hr1G074900::chr5H:545293226-545295234	92.0235215094592	-1.26915488191921	0.312804772723956	-4.0573386104924	4.96350937320855e-05	0.00100542146513567
gene:HORVU5Hr1G014290::chr5H:49955775-49957183	246.154281273983	-1.26861822524577	0.257386400982582	-4.92884713567919	8.27162602995829e-07	3.27531466866107e-05
gene:HORVU3Hr1G050440::chr3H:362272490-362277070	219.643692906062	-1.26800450507132	0.284583333241491	-4.45565272789646	8.36383274100208e-06	0.000238937428277595
gene:HORVU4Hr1G066900::chr4H:556036916-556041079	425.998030770959	-1.26466906273093	0.284227751313517	-4.44949184900647	8.6073696310364e-06	0.000243906406822333
gene:HORVU7Hr1G046870::chr7H:154391537-154392601	32.84731789086	-1.26395308713542	0.416675040099178	-3.03342644866506	0.00241793644949741	0.0221909785190452
gene:HORVU2Hr1G028330::chr2H:95771938-95773782	61.6436653719932	-1.26200146037379	0.345525591477553	-3.65241096897385	0.00025978967941892	0.00387950127802713
gene:HORVU3Hr1G091480::chr3H:635910153-635912912	43.2944211203315	-1.26064099147079	0.317500737203658	-3.97051358864142	7.17178653538073e-05	0.00133892234585401
gene:HORVU7Hr1G089370::chr7H:542577530-542579345	221.302998938797	-1.26017648478017	0.381105606650418	-3.30663328691492	0.00094424416636072	0.0107143431418783
gene:HORVU5Hr1G122510::chr5H:662253996-662257546	53.4788425869608	-1.25985323630986	0.441690477268381	-2.85234412138875	0.00433980913192595	0.0344335195501415
gene:HORVU2Hr1G113460::chr2H:728829770-728834197	1491.40342937055	-1.25823760864296	0.345261327799506	-3.64430507367342	0.000268115246195444	0.0039542141100808
gene:HORVU5Hr1G046900::chr5H:363532872-363535388	147.407793206306	-1.25583457856868	0.243021667633781	-5.16758275423058	2.3714097828056e-07	1.12553639036728e-05
gene:HORVU4Hr1G076520::chr4H:600746172-600750872	140.920292444556	-1.25451180366522	0.332346579061192	-3.77470954329948	0.000160194205091513	0.00261861469028441
gene:HORVU7Hr1G059850::chr7H:270642666-270647056	29.2237251710375	-1.25419280217394	0.410039927721126	-3.05870896315964	0.00222292989097221	0.0208105848104275
gene:HORVU3Hr1G088200::chr3H:624065026-624067854	190.687094175526	-1.25314801177018	0.34814427364271	-3.59950775193919	0.000318820129450921	0.00452023738491913
gene:HORVU1Hr1G047440::chr1H:350897440-350900645	413.877762444492	-1.24952639420018	0.232906853159026	-5.36491896761417	8.09855685068287e-08	4.31089256563185e-06
gene:HORVU4Hr1G088080::chr4H:639392926-639395123	93.8459265752087	-1.2493162218009	0.354364740053758	-3.52550939918961	0.000422669177755203	0.00569432589700837
gene:HORVU4Hr1G010030::chr4H:29521130-29527355	223.431432750978	-1.24806622982324	0.308997140885756	-4.03908666030239	5.36597385841306e-05	0.0010735011070123
gene:HORVU1Hr1G054610::chr1H:403276715-403281720	50.7030344466797	-1.24750411378164	0.414777024130574	-3.00764999314166	0.00263276166222057	0.023666715138884
gene:HORVU2Hr1G120090::chr2H:747125140-747126003	50.5168346320185	-1.24563769667264	0.319665022739652	-3.89669687974319	9.75135409232277e-05	0.00173022760460066
gene:HORVU3Hr1G069080::chr3H:524011907-524013136	26.6604879182574	-1.24330955173336	0.45513918563033	-2.73171282760784	0.00630060323808131	0.0455710443060946
gene:HORVU3Hr1G087740::chr3H:622654279-622660539	451.127810119209	-1.24174884114363	0.193214235529234	-6.42679788961901	1.30319904840957e-10	1.34318937214998e-08
gene:HORVU5Hr1G061710::chr5H:481383095-481386428	123.009417553637	-1.23966843420337	0.301094378522	-4.11720883096061	3.8348856068849e-05	0.000819433991568718
gene:HORVU3Hr1G086040::chr3H:615449434-615452271	74.8807779488051	-1.23885339643414	0.287831040943464	-4.30409935069331	1.67666415122496e-05	0.000420686640139094
gene:HORVU2Hr1G112050::chr2H:724863998-724868380	67.7778349393657	-1.23824643585468	0.389052534548495	-3.18272296385806	0.00145897136393764	0.0149925674872011
gene:HORVU6Hr1G014420::chr6H:30642484-30645305	39.3226160154457	-1.2363979289253	0.361214036676744	-3.42289557820193	0.000619578736528218	0.00773131306483223
gene:HORVU3Hr1G079370::chr3H:583091542-583102975	134.120201214663	-1.23614733346055	0.335445385140451	-3.68509268041644	0.000228619432851004	0.00352674409033398
gene:HORVU7Hr1G095080::chr7H:579476121-579477429	30.4163868647086	-1.2355382758756	0.376226013676461	-3.28403202054528	0.0010233329484516	0.0113604005143313
gene:HORVU2Hr1G064890::chr2H:442105756-442107078	23.7839735629721	-1.23451974587723	0.386715926886694	-3.19231678874953	0.00141136448690454	0.0145538743019396
gene:HORVU4Hr1G089540::chr4H:642587401-642590183	169.631018774431	-1.23349075807758	0.269134177232439	-4.5831814107068	4.57954404050986e-06	0.000143930482803827
gene:HORVU7Hr1G073050::chr7H:411642614-411648822	440.546563871185	-1.23296343822649	0.233638800523622	-5.27722037377022	1.3115812268129e-07	6.66118523549952e-06
gene:HORVU5Hr1G038710::chr5H:278441769-278446391	78.4636407895737	-1.23281009367758	0.222145222224936	-5.54956834691353	2.8637578099007e-08	1.73026930203943e-06
gene:HORVU5Hr1G094220::chr5H:594546797-594548837	63.1900101390675	-1.23019333187503	0.403032397383491	-3.05234353332763	0.00227062073515439	0.0212092721356536
gene:HORVU2Hr1G123890::chr2H:757113531-757210982	40.4020445945292	-1.22877301751954	0.265078208614427	-4.63551124757626	3.56056362437265e-06	0.00011743134664848
gene:HORVU3Hr1G095880::chr3H:651020620-651022321	95.3441291905568	-1.2267445858745	0.213049151616231	-5.75803553578213	8.5098443544588e-09	5.94445140853325e-07
gene:HORVU7Hr1G102080::chr7H:611158526-611161083	20.6855377514369	-1.22656295519521	0.380842398626199	-3.22065757284313	0.00127896862377798	0.0134930227213025
gene:HORVU5Hr1G082810::chr5H:568482989-568486079	1555.71299666176	-1.22652593803553	0.3100526165383	-3.95586385217306	7.6258584330251e-05	0.00141021371515203
gene:HORVU3Hr1G067910::chr3H:515465430-515478053	87.495967113428	-1.22438387876238	0.419681327633873	-2.91741328037002	0.00352947777702641	0.0296288908352762
gene:HORVU1Hr1G024860::chr1H:116968883-116969646	81.5511722585601	-1.22295591592815	0.41907918444568	-2.91819770897418	0.00352061048062269	0.0295979032249391
gene:HORVU3Hr1G073050::chr3H:551757645-551760667	24.465023206348	-1.22252537176604	0.390968806645824	-3.12691281499988	0.0017665230517993	0.0174216293091614
gene:HORVU2Hr1G105010::chr2H:705531257-705595406	90.9481612147358	-1.22070798015641	0.379488598013976	-3.21671846412486	0.00129665771583558	0.0136385818575082
gene:HORVU6Hr1G083350::chr6H:551130889-551131531	45.0306352097375	-1.21909274047291	0.349370380984471	-3.48939923595611	0.000484107533816816	0.00633406658745014
gene:HORVU2Hr1G098500::chr2H:682929536-682930628	18.8436335291823	-1.21858524276019	0.446341085543646	-2.7301659699912	0.00633024472897495	0.0457387373441331
gene:HORVU2Hr1G084120::chr2H:610185652-610190916	101.95532707791	-1.21794994313856	0.313504932026948	-3.88494667456738	0.000102352351354462	0.00179637774589225
gene:HORVU2Hr1G018480::chr2H:47285786-47287644	145.431524599605	-1.21603683880538	0.337928732229287	-3.59850087556417	0.000320056773435692	0.00452860950084715
gene:HORVU5Hr1G096890::chr5H:602473998-602476630	49.0906338591115	-1.21424649603479	0.309768508258826	-3.91985132013558	8.86036132451096e-05	0.00158821787902103
gene:HORVU4Hr1G086540::chr4H:634606405-634610947	182.106256119869	-1.21122593642763	0.192672517231966	-6.28644891253165	3.24809835740912e-10	3.0488623242359e-08
gene:HORVU2Hr1G091460::chr2H:648082051-648083820	50.6630462523657	-1.20795062406186	0.324647337998346	-3.72080865196564	0.000198585867719454	0.00312769022821666
gene:HORVU6Hr1G069180::chr6H:479026600-479030367	32.4793689560918	-1.20707189731625	0.366880787041715	-3.29009296738943	0.00100154286351527	0.0111597457595506
gene:HORVU6Hr1G080460::chr6H:541820252-541823529	53.4289761537309	-1.2040749123729	0.347268825547827	-3.46727037900231	0.000525772738100389	0.00677383430839385
gene:HORVU7Hr1G085790::chr7H:518837029-518843807	122.266457325057	-1.20281139988323	0.359528334139375	-3.3455260286021	0.000821266505205444	0.0096200275980221
gene:HORVU3Hr1G032760::chr3H:169965769-169967689	58.9352831298963	-1.20278042749082	0.256880423614056	-4.68225803495991	2.83732007066256e-06	9.59735625810247e-05
gene:HORVU3Hr1G076550::chr3H:568915331-568916269	37.7591476761119	-1.20033515368949	0.398608793845785	-3.01131127115544	0.00260122048645517	0.0234936692217382
gene:HORVU2Hr1G105100::chr2H:705662378-705663632	103.494120412889	-1.20016995454318	0.299222583482441	-4.01096047155013	6.04722352780163e-05	0.00117656779819139
gene:HORVU4Hr1G006850::chr4H:16285881-16287681	304.255515689574	-1.19763736091762	0.343353019310659	-3.48806416009413	0.00048653131414711	0.00635786663222942
gene:HORVU6Hr1G076380::chr6H:525748793-525752868	37.5642185543977	-1.19757749804642	0.329646699619656	-3.63291214329819	0.000280240457177049	0.00408339282924784
gene:HORVU7Hr1G109140::chr7H:627163191-627164352	1689.18306492603	-1.19125785792615	0.215177597387327	-5.53616116357058	3.09173094289879e-08	1.85204372664928e-06
gene:HORVU7Hr1G116190::chr7H:642855399-642858973	39.811869618074	-1.1911299554102	0.327123095364606	-3.64122855368124	0.000271340116782233	0.00398686044406934
gene:HORVU3Hr1G007580::chr3H:18003575-18005443	33.0054579916829	-1.18972054551806	0.407716575645824	-2.91800877517313	0.00352274436098253	0.0296040059688324
gene:HORVU7Hr1G109020::chr7H:626812511-627023020	560.14800159568	-1.18898642757706	0.292468145342004	-4.06535360008759	4.79596923058668e-05	0.000984766103928864
gene:HORVU2Hr1G017370::chr2H:41249924-41252008	41.6269557129507	-1.1871973299315	0.386794716002208	-3.06932147936769	0.00214545586510201	0.0202470175133011
gene:HORVU3Hr1G022260::chr3H:78237355-78239333	167.900203772494	-1.18633663099313	0.39002031577885	-3.04173034838987	0.00235222510707917	0.021722366822895
gene:HORVU2Hr1G014710::chr2H:32079988-32082807	59.9203829967992	-1.18502987821816	0.34476765373699	-3.43718404372753	0.000587796054462566	0.00741836725157858
gene:HORVU1Hr1G029180::chr1H:161555023-161556792	210.87184836576	-1.1849793543755	0.290605949092859	-4.07761560998483	4.54999073656618e-05	0.000939765277279376
gene:HORVU4Hr1G059390::chr4H:496746551-496749295	1746.41283252662	-1.18421656370777	0.287010280015063	-4.12604232728394	3.69059371412749e-05	0.000795881265981996
gene:HORVU5Hr1G084120::chr5H:571192327-571195894	144.640628299435	-1.18343451452098	0.321393655210884	-3.68219625787094	0.000231233288530003	0.00355923215566021
gene:HORVU1Hr1G040720::chr1H:287648498-287657442	42.1786545499041	-1.18287990054018	0.31521016507504	-3.75267054049027	0.000174960729019697	0.00281463220227096
gene:HORVU7Hr1G048470::chr7H:165719693-165722564	636.015610485548	-1.18190060539116	0.151391969617747	-7.80689100204829	5.86159202000952e-15	1.6015280475372e-12
gene:HORVU5Hr1G024160::chr5H:129713347-129714880	59.6426803714185	-1.18013990931055	0.415298342100076	-2.84166775947824	0.00448782335784398	0.0352487762129352
gene:HORVU7Hr1G010230::chr7H:14183550-14186513	250.695557995294	-1.17921540607335	0.165256202510965	-7.13568016301903	9.63097195177832e-13	1.62000653006473e-10
gene:HORVU2Hr1G064100::chr2H:434326769-434328129	350.016650659674	-1.177726227128	0.151856589578228	-7.75551611160935	8.79849062313396e-15	2.22888028725319e-12
gene:HORVU6Hr1G077890::chr6H:532522318-532526439	224.574080744625	-1.17626545506048	0.171520792866467	-6.85785924495014	6.99000784967054e-12	9.86388624477669e-10
gene:HORVU7Hr1G122160::chr7H:655482289-655483402	39.4262439592682	-1.17604569258999	0.309423582772117	-3.80076296077315	0.000144251244956178	0.00240907599400207
gene:HORVU4Hr1G060390::chr4H:507741545-507744979	464.158109333063	-1.17597536800038	0.145352934257435	-8.09048247982119	5.94288483981598e-16	2.01540478454792e-13
gene:HORVU2Hr1G066680::chr2H:463227795-463231834	121.240399484167	-1.17552263079895	0.22332612603736	-5.26370403524707	1.41181662628204e-07	7.08469126114703e-06
gene:HORVU3Hr1G097870::chr3H:657173738-657174956	23.8573431349158	-1.17419690656388	0.332808129935385	-3.52814970833749	0.000418475408513199	0.00565843340154246
gene:HORVU0Hr1G015780::chrUn:84995050-84999150	32.845108543434	-1.17334529802691	0.402719529258816	-2.91355450327028	0.00357339452444669	0.0298744307240621
gene:HORVU7Hr1G037910::chr7H:91967525-91970897	139.927430122412	-1.16985500109688	0.239171215730963	-4.89128676091529	1.00178886500584e-06	3.87198762419353e-05
gene:HORVU2Hr1G004070::chr2H:9291068-9301265	46.5627901180777	-1.16978441617588	0.271191045747926	-4.31350678614665	1.60685205270625e-05	0.000404902762543943
gene:HORVU5Hr1G105930::chr5H:622832961-622834053	269.755339223583	-1.16904775397534	0.340645003771066	-3.43186525865211	0.00059944530410967	0.00753823981113034
gene:HORVU6Hr1G070290::chr6H:488845870-488847803	61.5840287209495	-1.16644660320765	0.331226427963788	-3.52159883611452	0.000428952731872791	0.00575568611382087
gene:HORVU3Hr1G096850::chr3H:654640598-654642242	115.644613020155	-1.16635859380658	0.323397651735107	-3.60657718925533	0.000310262593917695	0.00441720157987759
gene:HORVU7Hr1G085660::chr7H:518163322-518166190	89.6340267385879	-1.1654486660452	0.246742297048316	-4.7233436665988	2.3199831282915e-06	8.07615318798957e-05
gene:HORVU6Hr1G067430::chr6H:467362063-467373464	72.6374844604583	-1.16405650622029	0.244478509510342	-4.76138581076815	1.922680780838e-06	6.91415319856351e-05
gene:HORVU3Hr1G020230::chr3H:62321473-62325343	744.433316860336	-1.1635885656926	0.159766083912064	-7.28307621493087	3.26292762087144e-13	6.18074920328314e-11
gene:HORVU0Hr1G023150::chrUn:116589708-116591784	42.9210341223838	-1.16170458920892	0.28945846761387	-4.01337227680829	5.98573972314184e-05	0.00117239992913643
gene:HORVU7Hr1G078960::chr7H:464071851-464077072	70.8640005394311	-1.16156606114203	0.365176157059684	-3.18083762777588	0.00146849911257384	0.0150617865077939
gene:HORVU7Hr1G021260::chr7H:30017771-30023102	46.8841043502278	-1.15706510391069	0.291096173504207	-3.97485507961845	7.04221240606928e-05	0.00131969303074878
gene:ENSRNA049479764::chr5H:19392915-19393022	96.1607966340886	-1.15651019767633	0.307773814816854	-3.75766274452079	0.000171507821014157	0.00276543208945067
gene:HORVU3Hr1G048610::chr3H:336344420-336347049	124.48693415444	-1.15626358947299	0.178220171891986	-6.48783792091599	8.70768786710386e-11	9.20039422581537e-09
gene:HORVU2Hr1G079270::chr2H:573924660-573926042	79.0157522200734	-1.15560112922338	0.30731925378797	-3.76026270719981	0.000169735013727253	0.00274526799894555
gene:HORVU6Hr1G061020::chr6H:407801003-407805826	165.085269810402	-1.1544050969247	0.202591119490867	-5.69820187491854	1.2107763173508e-08	8.03084632448518e-07
gene:HORVU7Hr1G081740::chr7H:487881840-487883597	82.5635164842907	-1.15299800980233	0.340703729171362	-3.3841660982302	0.000713947984710803	0.00863720962400999
gene:HORVU7Hr1G089850::chr7H:546040103-546043135	34.9945702238941	-1.15045416876898	0.37091794006752	-3.10164067167943	0.00192451409032461	0.0185278540582259
gene:HORVU3Hr1G003450::chr3H:8786797-8788295	122.506700685724	-1.15035155772847	0.179629629583856	-6.40401898280071	1.51339282950688e-10	1.5372269388025e-08
gene:HORVU4Hr1G079940::chr4H:613751730-613756976	103.078085315465	-1.14771815638816	0.23670181985819	-4.84879312324583	1.24214879513162e-06	4.67048427294267e-05
gene:HORVU2Hr1G044330::chr2H:231216859-231217777	52.4336962719872	-1.14683386788104	0.281321989443181	-4.07658807671223	4.57013493097189e-05	0.000942999578592885
gene:HORVU4Hr1G019930::chr4H:96369113-96371272	39.109073920684	-1.14596939258157	0.333605029931577	-3.43510825606141	0.000592317159153725	0.00746821478442146
gene:HORVU2Hr1G104960::chr2H:705262470-705263885	138.68522857127	-1.14592517790977	0.270952647847822	-4.22924517258592	2.34476705453434e-05	0.000549009711454778
gene:HORVU7Hr1G002560::chr7H:4832445-4834772	80.0550385196642	-1.14447775300224	0.412302411255317	-2.77582114913592	0.00550624890324601	0.0412890119256957
gene:HORVU2Hr1G125280::chr2H:760723468-760725708	620.364311669685	-1.14037190350676	0.168646098614477	-6.76192282463433	1.36172239608676e-11	1.74582775000733e-09
gene:HORVU2Hr1G021830::chr2H:62342207-62342635	39.4517814016966	-1.13999751777686	0.356897432186615	-3.1941880634792	0.00140224736100343	0.0144811655267476
gene:HORVU5Hr1G017510::chr5H:67679760-67681455	28.172207477175	-1.13886885686219	0.331659069445354	-3.43385410435711	0.0005950643903217	0.00749659908382508
gene:HORVU1Hr1G002220::chr1H:4404729-4406482	53.5238611559876	-1.13715927560543	0.315303697422036	-3.60655230148898	0.000310292339649919	0.00441720157987759
gene:HORVU5Hr1G022790::chr5H:118519199-118522255	86.6129287095838	-1.13665059752152	0.379453230893562	-2.99549590036394	0.00273998984510055	0.0243701465664485
gene:HORVU1Hr1G000720::chr1H:1922329-1929669	42.4614354214737	-1.13401829573523	0.387005431252838	-2.93023871025303	0.0033870170520699	0.028750674419387
gene:HORVU3Hr1G109160::chr3H:677159773-677165242	39.1401264029782	-1.13192655777079	0.295520876652741	-3.83027612326992	0.000127999543919036	0.00218628627980638
gene:HORVU2Hr1G092880::chr2H:655536518-655538507	24.5745213921105	-1.13094412494779	0.376265181451054	-3.005710282802	0.00264961318648024	0.0237775360046665
gene:HORVU1Hr1G028030::chr1H:147239825-147280641	1193.97893710156	-1.13044489571074	0.29875655195874	-3.78383298474693	0.000154431474434809	0.00255072755810393
gene:HORVU2Hr1G089670::chr2H:640242204-640267547	31.2597077235047	-1.13023551659074	0.353603016418424	-3.19634014448937	0.00139182926137672	0.0144302771448259
gene:HORVU2Hr1G032280::chr2H:124447195-124449782	250.159188136861	-1.12767064725007	0.2262030443997	-4.98521428057124	6.18931798875009e-07	2.53677582907328e-05
gene:HORVU3Hr1G097200::chr3H:655379012-655384064	83.34809977622	-1.12704445472712	0.247978054010438	-4.54493628165854	5.49518748869629e-06	0.000167451901648302
gene:HORVU7Hr1G030050::chr7H:58178806-58183475	42.3658166963801	-1.12694462612662	0.414813991586326	-2.71674690098319	0.00659270017843375	0.0471009561507808
gene:HORVU1Hr1G075150::chr1H:509976501-509979975	585.416532724784	-1.1268589361783	0.172377747388054	-6.53714851976535	6.27027761167183e-11	6.86660713869854e-09
gene:HORVU5Hr1G023480::chr5H:122561065-122567526	128.489966025462	-1.12572618996365	0.356382347505849	-3.15875967999558	0.00158442083883918	0.0160394956944788
gene:HORVU7Hr1G101530::chr7H:609589419-609593263	56.5416014187282	-1.12525045020253	0.312664818001854	-3.59890331567735	0.000319561959443235	0.004526359933076
gene:HORVU4Hr1G008440::chr4H:22878781-22884099	175.414170790905	-1.12468637758773	0.345091609561753	-3.25909511105187	0.00111768190852355	0.0121826748619058
gene:HORVU5Hr1G075370::chr5H:546896965-546898350	224.325323694404	-1.12462554493803	0.381467670314509	-2.94815428004896	0.00319677480980282	0.0274572659930204
gene:HORVU0Hr1G019630::chrUn:103654179-103656655	26.8117530888622	-1.12391113404672	0.311402894184521	-3.60918653948266	0.000307158683327719	0.00438446603913688
gene:HORVU5Hr1G098720::chr5H:608578256-608580493	78.7337235263656	-1.12266835241413	0.322246176248149	-3.483884170435	0.000494193312852594	0.00643798549940437
gene:HORVU3Hr1G061410::chr3H:467237358-467240913	69.9345982388183	-1.12012596464117	0.376210825830145	-2.97738897377422	0.00290714917601777	0.0255542301734739
gene:HORVU3Hr1G027650::chr3H:119669944-119674566	53.6477499428547	-1.11753940146753	0.406586368313367	-2.74859043135998	0.00598521221350604	0.0439556660849382
gene:HORVU2Hr1G110810::chr2H:721189604-721195420	49.3325935536849	-1.11750541118837	0.283588145536322	-3.94059282370545	8.12804908166159e-05	0.00148479895735028
gene:HORVU6Hr1G018520::chr6H:47359726-47366647	78.1688878550001	-1.11558133035258	0.346225754428405	-3.22212116251817	0.00127245313563462	0.0134394073888902
gene:HORVU4Hr1G029660::chr4H:189471434-189502224	29.7915809188866	-1.11505181712085	0.314314835843077	-3.5475634299284	0.000388812116231589	0.00531545094660949
gene:HORVU5Hr1G109570::chr5H:630295534-630298073	52.53729625456	-1.11395002925541	0.27332380469675	-4.07556901416371	4.5901965756735e-05	0.000946210521569715
gene:HORVU2Hr1G095170::chr2H:668833609-668840275	205.643632047635	-1.11388033605952	0.162407905629254	-6.85853519102877	6.95701951092064e-12	9.86388624477669e-10
gene:HORVU3Hr1G082110::chr3H:597723443-597793672	88.5374786719396	-1.1135918794739	0.319444343921653	-3.48602785011908	0.00049024996254257	0.00639057390726601
gene:HORVU1Hr1G054390::chr1H:401885289-401889281	48.1966890520572	-1.1129894539803	0.331293884544581	-3.3595230878176	0.000780771270495511	0.00929060369747517
gene:HORVU7Hr1G038330::chr7H:96518993-96521424	112.737434686308	-1.11278654777423	0.229304876293314	-4.85286909621063	1.21688018152629e-06	4.60182062891581e-05
gene:HORVU0Hr1G006800::chrUn:39382983-39383742	131.668139748759	-1.11216384916212	0.283382320194955	-3.92460562958549	8.68719353361823e-05	0.00156518364385482
gene:HORVU0Hr1G039970::chrUn:249558655-249562177	79.2079772175223	-1.11197490945632	0.327696350845554	-3.39330879513029	0.000690537473815623	0.00840233849794404
gene:HORVU3Hr1G099630::chr3H:662027089-662029422	107.788061146695	-1.10971364779923	0.261595453351194	-4.24209837588205	2.21439581147399e-05	0.000527292030940568
gene:HORVU5Hr1G105060::chr5H:620794989-620796470	219.294573315766	-1.10749824997127	0.273519833772853	-4.04906011638995	5.14237354640878e-05	0.00103566615121447
gene:HORVU2Hr1G092820::chr2H:655479963-655483904	80.4130680124696	-1.10740192432438	0.273180416224247	-4.05373833025914	5.04055963795951e-05	0.00101710947166734
gene:HORVU2Hr1G035830::chr2H:154969255-154972246	39.0879732364718	-1.10480686234663	0.397939451022632	-2.77631900910422	0.00549782355320005	0.041240541573166
gene:HORVU2Hr1G014450::chr2H:31561634-31565524	108.364306245063	-1.1048036457334	0.227967733718764	-4.84631586984303	1.25775210569475e-06	4.70560423030922e-05
gene:HORVU3Hr1G081020::chr3H:592448149-592455316	68.6214027278101	-1.10392258777955	0.275642373757391	-4.00490887061935	6.20413939557457e-05	0.00120007575833809
gene:HORVU5Hr1G114700::chr5H:644465735-644469105	434.837942744691	-1.10348891848887	0.302116900147139	-3.65252297356235	0.000259676355950256	0.00387950127802713
gene:HORVU6Hr1G075760::chr6H:521670478-521672805	70.357365524789	-1.10303093016179	0.32245923437336	-3.42068333786541	0.000624640172801226	0.00778061864533092
gene:HORVU6Hr1G067470::chr6H:467583583-467586316	43.6663718486949	-1.10232573899186	0.318917979403911	-3.4564552962872	0.000547329984363078	0.00699584209800491
gene:HORVU5Hr1G028550::chr5H:169085258-169100390	154.778226933332	-1.10112091616134	0.396211780236502	-2.77912210359841	0.00545060323058406	0.0409593936834384
gene:HORVU0Hr1G021950::chrUn:113593288-113597602	103.11114125195	-1.10097556793284	0.326766553041672	-3.36930312384952	0.000753585044523439	0.00903356849837505
gene:HORVU5Hr1G108750::chr5H:628645670-628647944	20.3119253925404	-1.10092260042555	0.382412891389291	-2.878884643313	0.00399084282560435	0.0323732489394896
gene:HORVU6Hr1G078650::chr6H:535400288-535403905	197.154356928364	-1.10091135547091	0.204476024739211	-5.38406082999221	7.28238745921809e-08	3.97712931733817e-06
gene:HORVU5Hr1G098090::chr5H:606353514-606356177	188.616138219467	-1.09978201875808	0.267214008522904	-4.1157348929325	3.85947715988873e-05	0.000822530200321274
gene:HORVU6Hr1G006880::chr6H:14328001-14332255	315.128301785428	-1.0996813399482	0.25040534732417	-4.39160485867969	1.12517048078301e-05	0.000306448633794605
gene:HORVU3Hr1G035820::chr3H:200570168-200570766	28.025751801616	-1.09899237391385	0.401512577321784	-2.73713063048854	0.00619776768786399	0.0450877157328129
gene:HORVU2Hr1G033450::chr2H:132654637-132660537	209.606737955891	-1.09866264656099	0.215014230761439	-5.10972061091143	3.22635560463549e-07	1.46201191687642e-05
gene:HORVU3Hr1G069720::chr3H:528525314-528528575	79.7624278502617	-1.0986484012097	0.353741706122252	-3.10579267922119	0.00189769715805871	0.0183537168561833
gene:HORVU7Hr1G052750::chr7H:202585117-202590479	165.880248975388	-1.09714848888183	0.18528846657116	-5.9212994159055	3.1940771730028e-09	2.44213333234752e-07
gene:HORVU7Hr1G074820::chr7H:429807005-429811723	186.715394572132	-1.09624948408849	0.250221810652044	-4.38111082815608	1.1807578951041e-05	0.000317475901565969
gene:HORVU2Hr1G039030::chr2H:185908987-185909913	69.4908226010691	-1.09509652104993	0.373349041952871	-2.93317083478191	0.00335519220096565	0.0285381356057863
gene:HORVU5Hr1G098490::chr5H:607884668-607888842	258.689634077169	-1.09455298442443	0.212825523737745	-5.14295919587727	2.70444377997387e-07	1.2497502179721e-05
gene:HORVU1Hr1G016770::chr1H:55918163-55920232	141.819406054537	-1.09337881403921	0.372719947629582	-2.9335130061937	0.00335149611989301	0.028518234486795
gene:HORVU2Hr1G018470::chr2H:47269326-47271020	114.139028662868	-1.09322037994955	0.381227198605107	-2.86763479612577	0.00413552595310594	0.0332391317622345
gene:HORVU2Hr1G072210::chr2H:517227968-517229981	189.580376264455	-1.0913925879064	0.4045466140453	-2.69781664217361	0.00697958722114743	0.0490836614436677
gene:HORVU3Hr1G080010::chr3H:586480062-586481307	274.81583516545	-1.09090620732275	0.232457338057636	-4.692930825235	2.69318576916298e-06	9.19518358084196e-05
gene:HORVU2Hr1G073830::chr2H:532996008-532997964	161.868923648057	-1.08874697620989	0.163861470406226	-6.64431347717552	3.04633609316900e-11	3.5193550931303e-09
gene:ENSRNA049479693::chr5H:597800731-597800928	322.437220497416	-1.08809035008233	0.191784742709632	-5.67349797856301	1.39910752735545e-08	9.05157996005404e-07
gene:HORVU1Hr1G059720::chr1H:434756829-434761522	250.53805041996	-1.08698144997619	0.210519099559653	-5.16333887162661	2.42583401093616e-07	1.14619294188637e-05
gene:HORVU2Hr1G111370::chr2H:722563004-722566934	63.4618770980927	-1.08552610595105	0.248302352680001	-4.37179146405439	1.23231200242521e-05	0.000329651299783619
gene:HORVU7Hr1G049070::chr7H:169947786-169949642	388.007351741998	-1.08541493735056	0.218889644656171	-4.95873132351926	7.09550163078998e-07	2.84713773452271e-05
gene:HORVU4Hr1G006790::chr4H:16105278-16107038	41.3120729910853	-1.08524818055604	0.366987405766802	-2.95718099177946	0.003104658206882	0.0268415063560448
gene:HORVU2Hr1G083090::chr2H:604171476-604173633	43.6008283112527	-1.08472885138481	0.375119903875928	-2.89168567217268	0.00383181101251978	0.0313836275865647
gene:HORVU6Hr1G019650::chr6H:53647953-53650766	25.1746350742691	-1.08263613021653	0.328398877130105	-3.29671081605925	0.000978241678297558	0.0109874516708784
gene:HORVU5Hr1G080500::chr5H:561548841-561551352	341.739646782053	-1.08020671221728	0.269677126670723	-4.00555555286755	6.18718899241589e-05	0.00119789904009702
gene:HORVU4Hr1G055220::chr4H:463075857-463077315	357.38256028218	-1.07879591769537	0.137269728377756	-7.85894989699842	3.8736713024506e-15	1.1312196222962e-12
gene:HORVU5Hr1G077110::chr5H:552726510-552729676	178.631157148192	-1.07804716491943	0.210486857803984	-5.12168396719268	3.0281910491558e-07	1.37815465366991e-05
gene:HORVU2Hr1G099790::chr2H:688488336-688488953	37.1894547117578	-1.07765753109256	0.376690838401891	-2.86085410429548	0.00422501432808974	0.0336867565560988
gene:HORVU5Hr1G062030::chr5H:482985871-483048764	65.5580029330182	-1.07649384942833	0.32123648269299	-3.35109462164405	0.000804927935875048	0.0094907221096338
gene:HORVU5Hr1G123550::chr5H:664379742-664386309	166.803284001384	-1.07472629578745	0.366482117991975	-2.93254770976571	0.0033619326340693	0.0285608062884611
gene:HORVU1Hr1G061120::chr1H:443260145-443262127	31.88490074071	-1.07422106597924	0.300612446076368	-3.573441751997	0.000352319643530292	0.00492544735696006
gene:HORVU6Hr1G054910::chr6H:348632715-348641827	246.557033207503	-1.07249239523468	0.23533092998939	-4.5573796665106	5.17957471160672e-06	0.000159452032044279
gene:HORVU3Hr1G038870::chr3H:226691006-226698584	93.4208952961667	-1.07196011644153	0.366151534342157	-2.92764065120594	0.00341544540179516	0.0289183633697016
gene:HORVU4Hr1G080350::chr4H:615129432-615131276	44.7662760810987	-1.07155260818377	0.386972441215631	-2.76906697752843	0.00562170772254634	0.0419900627262022
gene:HORVU3Hr1G028060::chr3H:123046471-123051412	625.296284365169	-1.0705449120543	0.173184767821318	-6.18151888022174	6.34877655085728e-10	5.68039896843937e-08
gene:HORVU4Hr1G004460::chr4H:10014358-10025200	775.457860430442	-1.06935242100023	0.170932453581426	-6.25599409939339	3.9499168046455e-10	3.64258555852966e-08
gene:HORVU6Hr1G053550::chr6H:334493400-334496468	102.588273829141	-1.06921643628662	0.244880623501293	-4.36627619204416	1.2638265641511e-05	0.000334254306136364
gene:HORVU4Hr1G067930::chr4H:563998199-564006623	58.3200635908983	-1.06756388435718	0.375327894756254	-2.84434996511644	0.00445021389051886	0.0350450177011421
gene:HORVU6Hr1G010650::chr6H:18851315-18853337	66.5310511826569	-1.06717880656428	0.3806326151853	-2.80369774945523	0.00505202408258327	0.0386690419950477
gene:HORVU2Hr1G044220::chr2H:230220182-230221373	167.940984484441	-1.06562558342598	0.374882112320365	-2.84256183051839	0.00447525495612114	0.0351763404513657
gene:HORVU2Hr1G004000::chr2H:9192725-9194589	48.6742432837724	-1.0646659983073	0.304478534685924	-3.49668655429363	0.000471074984767262	0.00621381595339802
gene:HORVU3Hr1G057860::chr3H:435525689-435526990	122.773571156425	-1.06447476641386	0.378955858129992	-2.80896770316905	0.00497006322582334	0.0381388866372852
gene:HORVU6Hr1G061870::chr6H:414150107-414152679	43.4588581143057	-1.06284178506324	0.302691707758731	-3.51130129375865	0.000445918689984406	0.00594162634702923
gene:HORVU2Hr1G038120::chr2H:176958153-176972622	269.548041141361	-1.06110775377766	0.311454577306349	-3.40694223522022	0.000656950290026698	0.00807307819877344
gene:HORVU2Hr1G050630::chr2H:294573847-294576327	35.0809212046596	-1.06060803579586	0.37376306290499	-2.83764807456501	0.00454472610718631	0.0356026121943738
gene:HORVU1Hr1G021780::chr1H:89129055-89132430	593.052418384192	-1.06003900287026	0.304826778207715	-3.47751273396304	0.000506089010823623	0.00656448336926435
gene:HORVU2Hr1G035680::chr2H:151187626-151189701	27.2680186647344	-1.05911662574299	0.332770342481033	-3.18272541310787	0.0014589590235297	0.0149925674872011
gene:HORVU5Hr1G045850::chr5H:355299091-355303323	157.698747198928	-1.05835457230662	0.258117026009215	-4.10028965802834	4.1263333808182e-05	0.000867602856650835
gene:HORVU5Hr1G096370::chr5H:601141343-601145787	1593.10663116909	-1.05702785636082	0.152988087938122	-6.90921672796085	4.87336948988677e-12	7.16555712547966e-10
gene:HORVU3Hr1G079960::chr3H:586405706-586408520	482.93624325726	-1.05573402058426	0.23086303558442	-4.57298855969609	4.8081640164105e-06	0.000149994742743393
gene:HORVU6Hr1G023290::chr6H:76875903-76880703	73.1414064076414	-1.05478152738169	0.255267931063357	-4.13205655323735	3.59531929832269e-05	0.000780136053318193
gene:HORVU4Hr1G013540::chr4H:47804442-47807438	76.4646222075244	-1.05387114781109	0.298479650395312	-3.53079731370406	0.000414309096494875	0.00560931298319461
gene:HORVU6Hr1G070750::chr6H:492878968-492884688	223.484309580952	-1.05297902673018	0.221906319244341	-4.74515115349531	2.08350693458268e-06	7.36265828681269e-05
gene:HORVU2Hr1G106080::chr2H:708558225-708561788	316.82696962998	-1.05176353650718	0.20315242506098	-5.17721379004694	2.25224078096138e-07	1.0738234616892e-05
gene:HORVU3Hr1G096210::chr3H:652302592-652307485	487.649090771586	-1.05085383380207	0.221014459057661	-4.75468364505471	1.98757400304109e-06	7.09520050729067e-05
gene:HORVU2Hr1G115640::chr2H:735220028-735229888	951.450613538508	-1.05038607222583	0.279323173205631	-3.76046877948277	0.000169595241285645	0.00274511897095609
gene:HORVU7Hr1G036390::chr7H:84513600-84515107	173.474661444073	-1.04999218577577	0.280509894445071	-3.74315561257816	0.000181723609131659	0.00290785434216306
gene:HORVU1Hr1G070580::chr1H:490364685-490370609	91.1626974010452	-1.04977839844345	0.305014485852463	-3.44173292461667	0.000578000612459866	0.00730351014277713
gene:HORVU6Hr1G035880::chr6H:174769172-174773122	220.414139457049	-1.04810021051306	0.20307530707746	-5.16114059161943	2.45449752935662e-07	1.15454819364596e-05
gene:HORVU1Hr1G077230::chr1H:516783652-516787802	160.33146986719	-1.04799853360581	0.179721610351705	-5.83123271350025	5.50193886196362e-09	4.04488694096668e-07
gene:HORVU1Hr1G074820::chr1H:509192979-509196234	141.787892583178	-1.047748520683	0.343789662744937	-3.04764405164894	0.00230642950104638	0.0214579587119474
gene:HORVU3Hr1G079340::chr3H:583076029-583165960	150.219204124984	-1.04514256468468	0.28292698728634	-3.69403631201478	0.000220722261783427	0.00342755264125431
gene:HORVU7Hr1G000580::chr7H:841402-846728	440.923876213237	-1.04276232265117	0.271101587905466	-3.84638957929966	0.000119871115077611	0.00206421790796221
gene:HORVU3Hr1G011640::chr3H:25094897-25097646	56.8929752988053	-1.04240439274502	0.287982907548924	-3.61967452032872	0.000294973812202226	0.00424511935343189
gene:HORVU0Hr1G021410::chrUn:112236272-112237829	24.8577510392372	-1.04201183615413	0.362722349003455	-2.87275333052116	0.0040691169262257	0.0328056949734746
gene:HORVU1Hr1G087570::chr1H:539490961-539492686	704.496546340531	-1.04089619868348	0.2611599384159	-3.98566566142256	6.72912089068139e-05	0.00127350581320852
gene:HORVU2Hr1G036000::chr2H:155965929-155967849	226.18933875706	-1.04055970048155	0.228422094363061	-4.55542491799262	5.2279787368708e-06	0.000160238310381116
gene:HORVU4Hr1G027900::chr4H:171833856-171837800	44.3924738519062	-1.03854837903058	0.275332302137303	-3.77198160538633	0.000161956198171193	0.00263771574186484
gene:HORVU0Hr1G016430::chrUn:88362195-88364528	233.592147086795	-1.03612349139877	0.195610757594395	-5.29686354749058	1.1780866148057e-07	6.07118852031979e-06
gene:HORVU7Hr1G042800::chr7H:125734259-125743831	60.3524076380144	-1.03468691235822	0.249634819748698	-4.14480204884806	3.40107383225964e-05	0.000743357363795127
gene:HORVU3Hr1G074640::chr3H:559036773-559041226	217.502155668745	-1.03374776361696	0.259077804951898	-3.99010545812248	6.60439239744717e-05	0.0012584910705039
gene:HORVU3Hr1G096120::chr3H:651962783-651966584	176.11409908962	-1.03173964694117	0.204750178722611	-5.03901707621433	4.67928739157249e-07	1.99972960762608e-05
gene:HORVU3Hr1G088120::chr3H:623761064-623763464	49.3715644348627	-1.03098499312075	0.333246754841053	-3.09375853821138	0.00197638267844173	0.0189577656007828
gene:HORVU4Hr1G003090::chr4H:6162123-6207845	84.233100175225	-1.0307408399485	0.222824051170897	-4.6258060318541	3.73144389858246e-06	0.000121828166788191
gene:HORVU4Hr1G000520::chr4H:739842-743253	69.6852053694392	-1.03023754112692	0.277645635540087	-3.71062033488429	0.000206751987785711	0.00323399720172384
gene:HORVU4Hr1G021190::chr4H:107227904-107230054	432.538002769996	-1.03007407044956	0.153687455699299	-6.70239523299141	2.05030570459535e-11	2.50637952004778e-09
gene:HORVU4Hr1G063660::chr4H:532452688-532454773	71.395435286844	-1.02946483631378	0.302413057548733	-3.4041679438656	0.000663659357313933	0.00814600212894498
gene:ENSRNA049487086::chr1H:550659339-550659475	520.42377788	-1.02855939297214	0.258094453233118	-3.9852053389273	6.74217963826619e-05	0.00127482975786137
gene:HORVU2Hr1G025150::chr2H:78167964-78170281	307.751183359151	-1.02817391780086	0.212862135818585	-4.83023396268625	1.36372713042782e-06	5.05709464627431e-05
gene:HORVU4Hr1G008700::chr4H:23875261-23881413	789.767684588468	-1.02710424567647	0.354194282571612	-2.89983293411521	0.00373361601283699	0.0308945337606889
gene:HORVU3Hr1G079050::chr3H:581638332-581645454	62.1593696062943	-1.02381982790995	0.218183177863681	-4.69247830164809	2.69915170501265e-06	9.1981140599021e-05
gene:HORVU7Hr1G079460::chr7H:469023783-469024924	93.5386203582363	-1.0234183231157	0.202077713856496	-5.06447892538248	4.0951893580391e-07	1.78249753181194e-05
gene:HORVU7Hr1G042490::chr7H:123701907-123710998	255.316491120249	-1.02231131422285	0.256306586697343	-3.98862677466042	6.64568843717778e-05	0.00125998417565464
gene:HORVU1Hr1G071810::chr1H:494910476-494913834	44.5610104299007	-1.02228839508064	0.351398679487109	-2.90919816936348	0.00362357091501694	0.0302098342819771
gene:HORVU6Hr1G093960::chr6H:580313305-580336891	44.7276766087203	-1.02091516424935	0.243565243231993	-4.19154699866985	2.77058777365824e-05	0.000633199766618893
gene:HORVU3Hr1G092420::chr3H:637942272-637944919	415.900863724861	-1.02048168738183	0.150460466354879	-6.78239083065782	1.18203178021771e-11	1.54368945409053e-09
gene:HORVU5Hr1G120800::chr5H:658376225-658378900	63.9584753006146	-1.0195478192626	0.312436312179396	-3.26321806883057	0.00110154723789357	0.0120505370572062
gene:ENSRNA049489139::chr7H:611187302-611187430	195.893403896498	-1.0192275228896	0.28882764211303	-3.52884341482362	0.000417380014832071	0.00564725366271501
gene:HORVU5Hr1G123200::chr5H:663438921-663441624	60.827751150463	-1.0181180303022	0.294296172000296	-3.45950143823542	0.000541176387150184	0.00692982625835553
gene:HORVU5Hr1G080690::chr5H:561954333-561958001	172.453130925789	-1.01565742434818	0.180417305915876	-5.62949002698086	1.80743222413605e-08	1.14123333167221e-06
gene:HORVU1Hr1G070390::chr1H:489289899-489292529	163.402894846574	-1.01438023863664	0.183681948530294	-5.52248191372675	3.34244214577322e-08	1.98525956375784e-06
gene:HORVU1Hr1G026320::chr1H:131743224-131748541	748.329972108006	-1.01367338790328	0.160332821877947	-6.32230741048726	2.57686088327595e-10	2.46277622417091e-08
gene:HORVU3Hr1G036380::chr3H:205571634-205576716	191.332845242666	-1.01365309989795	0.250994219400435	-4.03855157429252	5.37822692923558e-05	0.00107492965222536
gene:HORVU7Hr1G095230::chr7H:580722261-580724675	121.508092603161	-1.01091421485966	0.336261445497278	-3.00633399515867	0.0026441838685059	0.0237592350509424
gene:HORVU2Hr1G066280::chr2H:458134776-458137748	37.3957163514308	-1.00964268661905	0.370958898010003	-2.72171038903566	0.00649450304654726	0.0466052631592842
gene:HORVU1Hr1G075050::chr1H:509663088-509667186	69.5441226009418	-1.00855872594095	0.251240688003446	-4.01431286451147	5.96192228052269e-05	0.00117045170747218
gene:HORVU3Hr1G093080::chr3H:640803011-640804212	2451.71530142645	-1.00827993286271	0.318839409037251	-3.16234412774521	0.00156504495895645	0.0158815807466304
gene:HORVU6Hr1G068990::chr6H:477797739-477802660	96.4774223785092	-1.00807987137063	0.361229824912623	-2.79068837024869	0.00525960850602313	0.0399236564792933
gene:HORVU2Hr1G021810::chr2H:62289728-62290335	104.860404576981	-1.00799719945222	0.25603885625352	-3.93689151014694	8.25439016253852e-05	0.00150395847103583
gene:HORVU2Hr1G039070::chr2H:186433358-186438107	189.688514227264	-1.00508515009926	0.262200896437291	-3.83326359198637	0.000126454325395877	0.00216516990698185
gene:HORVU5Hr1G114090::chr5H:643099478-643110902	108.228303429943	-1.00323575233823	0.263134696904447	-3.81263194911363	0.000137494783279977	0.00231647861638205
gene:HORVU4Hr1G055140::chr4H:462896380-462899204	159.974440481802	-1.00282115996031	0.349154029108335	-2.87214546119173	0.00407695259267934	0.0328436801584965
gene:HORVU3Hr1G058100::chr3H:437413069-437415254	29.745831692812	-1.00203347082419	0.345828523519204	-2.89748647863787	0.00376165952920712	0.0310532600161401
gene:HORVU4Hr1G059860::chr4H:502028610-502031025	381.617878818992	-1.00106563754098	0.303498160889224	-3.29842406493649	0.000972291738402928	0.0109503206413766
gene:HORVU4Hr1G087630::chr4H:637603402-637606992	368.535480394472	-0.999830622169451	0.257129958452837	-3.88842524684979	0.000100896735460494	0.00178123825339408
gene:HORVU6Hr1G069310::chr6H:479997831-480001716	240.915825395823	-0.999214966298159	0.165445075280942	-6.03955702278473	1.54537893829729e-09	1.25942393630383e-07
gene:HORVU5Hr1G072620::chr5H:536016863-536019714	143.279114551318	-0.998327788572472	0.20019972338345	-4.98665918064402	6.14322946399002e-07	2.53677582907328e-05
gene:HORVU7Hr1G111130::chr7H:632510666-632519684	312.06170357963	-0.997387376675099	0.150368306245748	-6.63296276706781	3.29014826131283e-11	3.7802544995827e-09
gene:HORVU7Hr1G089240::chr7H:541371107-541372519	94.3475296187219	-0.997005672085535	0.274676263362246	-3.62974819841157	0.00028369783081064	0.0041150830639221
gene:HORVU7Hr1G039550::chr7H:103919911-103921418	76.4199266543244	-0.99522015079063	0.263169057586937	-3.78167615872494	0.00015577592864338	0.00256889778482801
gene:HORVU4Hr1G089200::chr4H:641851861-641853556	54.1683355894709	-0.994738394509996	0.272685843741091	-3.64792825642418	0.00026436342964609	0.00391996154565492
gene:HORVU5Hr1G095000::chr5H:597474345-597478238	115.722384246153	-0.992162696740735	0.18666630434814	-5.31516762066662	1.06559189866307e-07	5.55958691347138e-06
gene:HORVU3Hr1G059140::chr3H:447236705-447245971	366.801156628022	-0.991496553130739	0.192665447278152	-5.14620845168625	2.65804050075846e-07	1.233729791809e-05
gene:HORVU3Hr1G094090::chr3H:644957076-644960763	36.610884218745	-0.990802942678801	0.330245913352762	-3.00019743657038	0.00269804656354372	0.0240683610713069
gene:HORVU4Hr1G014910::chr4H:55856066-55861048	219.440835753805	-0.990447896949966	0.235012760954563	-4.21444304950512	2.50395323596412e-05	0.000579187246857884
gene:HORVU1Hr1G084390::chr1H:533870312-533872913	300.342395174295	-0.98600252284233	0.349271036400543	-2.82302973932137	0.00475721585984627	0.0369096755236633
gene:ENSRNA049486383::chr1H:139089426-139089582	46.777814394236	-0.985876321127894	0.297774774240099	-3.31081208488457	0.000930256556941824	0.0105956524194251
gene:HORVU6Hr1G053490::chr6H:333319136-333322130	54.4924681076295	-0.984560813364968	0.267709708012922	-3.67771800534572	0.000235329920110932	0.00359857956381996
gene:HORVU2Hr1G108150::chr2H:713471625-713474296	197.530614588375	-0.98426860048329	0.270392397532491	-3.64014894451689	0.000272480376807055	0.00399802679884517
gene:HORVU7Hr1G024670::chr7H:40108373-40111427	308.777689784244	-0.984154891843219	0.16310193774957	-6.03398650820637	1.5996342591761e-09	1.2936119205168e-07
gene:HORVU2Hr1G045970::chr2H:242827560-242829129	57.9762000221203	-0.982161760324301	0.295741237458248	-3.32101728107146	0.000896899837728428	0.0103187075636151
gene:HORVU6Hr1G062150::chr6H:415951559-415952632	251.985996045825	-0.979634138613058	0.230403338440744	-4.25182267428388	2.12037725902045e-05	0.000506637561154195
gene:HORVU5Hr1G062940::chr5H:488461981-488465721	705.764490883737	-0.978881886987403	0.267143607117728	-3.66425346108327	0.000248061046863109	0.00375032233215056
gene:HORVU3Hr1G003110::chr3H:7847380-7851348	100.925708907941	-0.97755229286755	0.261130233268688	-3.74354313796253	0.000181443434500969	0.00290558237152884
gene:HORVU1Hr1G085570::chr1H:535891336-535899031	342.748924540095	-0.977137819813131	0.230930966004876	-4.23129836902211	2.32346219340923e-05	0.0005460196844038
gene:HORVU3Hr1G003470::chr3H:8816979-8914719	47.8885628957069	-0.976266486974301	0.296533469110907	-3.29226407360164	0.000993842445282423	0.0110907880296735
gene:HORVU4Hr1G072320::chr4H:584394883-584397575	57.5378926009068	-0.976007131426357	0.275621965882773	-3.54110793855041	0.000398450538466443	0.00542604988458253
gene:HORVU2Hr1G028340::chr2H:95983560-95985598	51.2293148150311	-0.975670696121041	0.325285234484068	-2.99943124583735	0.00270484163076053	0.0241085206139767
gene:HORVU7Hr1G106600::chr7H:620235556-620269345	54.0219998338911	-0.975049481434782	0.290796697273113	-3.35302804529113	0.00079932606699395	0.00945786712696387
gene:HORVU7Hr1G076840::chr7H:449330060-449332182	45.4712391052837	-0.974554957550234	0.309482716680279	-3.14898023386886	0.00163841276797461	0.0165065964827188
gene:HORVU1Hr1G010380::chr1H:23812070-23816472	181.372459056562	-0.973995980518819	0.230326482656945	-4.22876244747557	2.34980294188229e-05	0.000549576825984616
gene:HORVU3Hr1G077670::chr3H:574276619-574280017	36.2864066617037	-0.9729492690143	0.301109130816833	-3.23121808486822	0.00123263851887801	0.01309650460303
gene:HORVU0Hr1G016890::chrUn:91126132-91128124	52.0539517585759	-0.972631803315125	0.28496690990086	-3.41313945416856	0.000642190711147348	0.00794744078433439
gene:HORVU7Hr1G029290::chr7H:54828226-54830529	54.8736060380146	-0.972327941215851	0.266875790428888	-3.64337259536825	0.000269088874420038	0.00395931607666601
gene:HORVU0Hr1G005320::chrUn:29768492-29771446	115.740960980778	-0.972229218982225	0.272697167098216	-3.56523402618283	0.000363531661992887	0.00505530206684023
gene:HORVU5Hr1G059140::chr5H:461843185-461846364	70.9509495156629	-0.971141498570051	0.352041063668351	-2.75860289833955	0.0058049026557994	0.0429270406486358
gene:HORVU3Hr1G061000::chr3H:464904626-464906838	59.3422915038486	-0.970995956115156	0.288753982433984	-3.36271017954583	0.000771813471143354	0.00921007380491496
gene:HORVU4Hr1G069990::chr4H:573525940-573536421	300.0938104437	-0.969809549120456	0.15962693280996	-6.07547568601745	1.23620710772104e-09	1.0396996258777e-07
gene:HORVU3Hr1G055910::chr3H:417326239-417333281	94.0921671352017	-0.969728844714101	0.256712508083569	-3.77748965936019	0.000158417080301184	0.00260021665137603
gene:HORVU7Hr1G095960::chr7H:585361981-585365480	125.063254372729	-0.968434777667969	0.353022953961596	-2.74326291477727	0.00608319582268188	0.0444526475752651
gene:HORVU7Hr1G093580::chr7H:571399718-571402003	165.992914027231	-0.967392036045249	0.203656823596612	-4.75010863353828	2.03307402067953e-06	7.22084702006889e-05
gene:HORVU5Hr1G086770::chr5H:577221119-577223547	78.5925119166098	-0.966795790325459	0.233328707299424	-4.14349267827039	3.42055996612805e-05	0.000746840019188042
gene:HORVU7Hr1G101240::chr7H:607946568-607950983	314.181702355757	-0.965065006428784	0.161683236724029	-5.96886248681436	2.38913360562505e-09	1.86743208891719e-07
gene:HORVU3Hr1G061450::chr3H:467715796-467720681	58.075217897976	-0.9649453732684	0.315050993398332	-3.0628228238861	0.00219259835880654	0.0205924571073022
gene:HORVU2Hr1G070300::chr2H:496220249-496224886	231.940895741419	-0.963762863895064	0.254412556599868	-3.78818906100944	0.00015174935732683	0.0025182967538705
gene:HORVU6Hr1G092320::chr6H:577099373-577100953	117.614332056566	-0.963133118738537	0.25517689618797	-3.77437429926676	0.000160409765104457	0.00261861469028441
gene:HORVU5Hr1G074340::chr5H:542981415-542984571	616.176642277121	-0.960943913703801	0.168621614861979	-5.69881811706262	1.20640848655501e-08	8.02719773364102e-07
gene:HORVU7Hr1G106540::chr7H:620078983-620086769	355.822411251733	-0.960303361937842	0.32242311718319	-2.97839488163074	0.00289762403653203	0.0254918171515157
gene:HORVU7Hr1G026720::chr7H:46263450-46265286	146.411028667591	-0.960025780121779	0.177523231406547	-5.40788815365365	6.37722266299368e-08	3.5379283301347e-06
gene:HORVU2Hr1G085800::chr2H:620201036-620234503	1097.51796594955	-0.95939420093722	0.172498969481734	-5.56173873861205	2.67099959167845e-08	1.62783876564148e-06
gene:HORVU2Hr1G126940::chr2H:765627838-765634298	65.1855157758757	-0.959021767858635	0.35554405544883	-2.69733596487217	0.0069896711797605	0.0491356824559158
gene:HORVU2Hr1G093690::chr2H:659203148-659209552	56.1231065102056	-0.958371390621236	0.280290515821692	-3.4192073456774	0.000628038496432405	0.00780445474349158
gene:ENSRNA049488244::chr3H:645863777-645863974	505.702028086535	-0.957139833154107	0.314633637648188	-3.04207725629243	0.00234951583863505	0.0217146901200618
gene:HORVU3Hr1G099220::chr3H:660934750-660938407	289.659877280189	-0.956036972771645	0.174064020110211	-5.4924445164849	3.964081087451e-08	2.32169272826587e-06
gene:HORVU2Hr1G104660::chr2H:704362280-704375788	419.304309704558	-0.955359912588887	0.13933545311543	-6.85654577659739	7.0545482358763e-12	9.88859541383567e-10
gene:HORVU3Hr1G077890::chr3H:575137841-575138829	46.4234758172513	-0.955198110798458	0.324775223957716	-2.94110523320837	0.00327043408077342	0.0279529052773748
gene:HORVU6Hr1G086560::chr6H:561743071-561747128	159.546272048199	-0.954447930874374	0.343516771370829	-2.77846093821148	0.00546170796595299	0.0410135256043312
gene:ENSRNA049474104::chrUn:53895252-53895448	274.997630672905	-0.950558687597176	0.258814377174639	-3.67274298272762	0.000239960801198604	0.00365272389339713
gene:HORVU6Hr1G009850::chr6H:17568114-17573728	96.8317988607071	-0.949459343524595	0.286171056444448	-3.31780353793014	0.000907282754627756	0.0104072707031114
gene:HORVU1Hr1G023510::chr1H:103974786-103980161	217.005759762873	-0.949132591144189	0.218389937109611	-4.34604544378715	1.3861386360071e-05	0.000356731345908019
gene:HORVU5Hr1G057800::chr5H:452484082-452489478	146.978486953571	-0.943719469110485	0.29706349817865	-3.17682742880428	0.00148895606434812	0.015249288947386
gene:HORVU5Hr1G079460::chr5H:556970321-556977163	88.7019770798201	-0.943514704133643	0.210472140666365	-4.48284842424479	7.36532468243793e-06	0.000215087939962417
gene:HORVU3Hr1G077580::chr3H:573806874-573809042	100.781210986314	-0.943507086223231	0.228522148005718	-4.12873366742388	3.64766622579758e-05	0.000788240802298252
gene:HORVU3Hr1G059850::chr3H:455125231-455127725	68.9123989657477	-0.942918887502016	0.348348372746151	-2.70682730643654	0.00679295834688592	0.0481715825300585
gene:HORVU5Hr1G062490::chr5H:486161210-486171931	168.250520901211	-0.94236119011501	0.194294263548196	-4.85017505357923	1.23352561148288e-06	4.64804829875252e-05
gene:HORVU1Hr1G077520::chr1H:517565846-517569260	32.7844239347211	-0.942330443687616	0.349000203570655	-2.70008565624473	0.00693216257621944	0.0488293635938325
gene:HORVU5Hr1G039810::chr5H:290164466-290165657	845877.404188477	-0.941095295374815	0.313157636599816	-3.00518073131788	0.00265423084510361	0.0238088130329132
gene:HORVU7Hr1G102480::chr7H:611624054-611627409	116.110236336548	-0.941087730808544	0.336043015553534	-2.80049781501447	0.0051023852898369	0.0389977292272304
gene:HORVU1Hr1G066530::chr1H:473008355-473010850	53.4552853485702	-0.940890458871082	0.319426905508556	-2.94555794344594	0.00322372760649948	0.0276250345985189
gene:HORVU3Hr1G061130::chr3H:466196206-466198413	745.003269151081	-0.936359287458582	0.290772667737887	-3.22024519960264	0.00128080994618145	0.013505671980146
gene:HORVU6Hr1G034990::chr6H:165912282-165921196	208.114282771624	-0.93560264042089	0.229030853800264	-4.08505065975444	4.40672010489752e-05	0.00091796935280103
gene:HORVU3Hr1G081930::chr3H:596708671-596713918	79.3761085719975	-0.934961342595648	0.315878669592391	-2.95987489057783	0.0030776399722986	0.026703147930254
gene:HORVU2Hr1G098800::chr2H:684694244-684699157	106.88979836993	-0.933696446625025	0.294031589516584	-3.17549705512972	0.00149580039839783	0.0153081127713365
gene:HORVU5Hr1G119060::chr5H:654684137-654689663	93.7850070228844	-0.933612757515764	0.191877747536105	-4.86566456769611	1.14072845864255e-06	4.32161379665194e-05
gene:HORVU5Hr1G079230::chr5H:556599466-556603387	566.089037311282	-0.933349314354482	0.167405026557881	-5.57539599345169	2.46967425016978e-08	1.5183441749728e-06
gene:HORVU2Hr1G041040::chr2H:200561640-200563730	85.3276809493452	-0.932935154993198	0.2331850876753	-4.00083540630294	6.3119251650562e-05	0.00121533460183582
gene:HORVU4Hr1G079800::chr4H:613384540-613385534	657.574703019449	-0.931545810454802	0.246897454721344	-3.77300694130757	0.000161291798720712	0.00263097079899278
gene:HORVU6Hr1G061980::chr6H:414581936-414585350	58.7971265097422	-0.931461600287704	0.320864939878646	-2.90297095294983	0.00369640919545605	0.030671152227174
gene:HORVU5Hr1G020170::chr5H:91036434-91039396	43.5151091111718	-0.931395954045096	0.275502560823882	-3.38071614020496	0.000722971890061917	0.00872493413300909
gene:HORVU3Hr1G030900::chr3H:151364972-151370130	64.6478235164816	-0.927011640805049	0.313566293500313	-2.95634977362172	0.00311303839523592	0.0268843247260031
gene:HORVU6Hr1G005260::chr6H:11567132-11574185	38.572231735473	-0.925605558313396	0.277455585950186	-3.3360494622717	0.000849780431671868	0.00990436993144828
gene:HORVU5Hr1G053930::chr5H:423480711-423487058	207.637132917054	-0.925321513014794	0.288221555343965	-3.21045215341549	0.0013252632927539	0.0138493966170196
gene:HORVU1Hr1G017120::chr1H:57887923-57892274	307.892037417448	-0.924390041933235	0.230914730828501	-4.00316618440326	6.25003665825938e-05	0.00120673343229166
gene:HORVU5Hr1G100790::chr5H:612002466-612003656	27.6309239121349	-0.924244196644603	0.338006171875983	-2.73440035581278	0.00624940072600267	0.0453259398637227
gene:HORVU1Hr1G089530::chr1H:544038839-544043510	157.022601476961	-0.923475451873705	0.243404819136811	-3.79399000869677	0.000148245641591973	0.00246209546612388
gene:HORVU0Hr1G031750::chrUn:188578004-188579696	550.523524877938	-0.922291876134657	0.301127940428777	-3.06279076867262	0.00219283322853846	0.0205924571073022
gene:HORVU6Hr1G017390::chr6H:41136971-41139753	68.8306203548029	-0.922048601096542	0.266254330762358	-3.46303700847407	0.000534114926467494	0.00685375784142181
gene:HORVU1Hr1G007420::chr1H:15064461-15066976	46.7780047017196	-0.921865729499037	0.307625105012672	-2.99671813020938	0.00272902918254411	0.0242829316936828
gene:HORVU2Hr1G018300::chr2H:46614789-46616212	182.870938352053	-0.921786135779914	0.297401316376598	-3.09946891631327	0.00193867919281642	0.0186471494547841
gene:HORVU6Hr1G062980::chr6H:423193037-423194233	1398.97548684989	-0.921103871608549	0.296595256225633	-3.10559205609083	0.00189898500823142	0.0183577281761259
gene:HORVU7Hr1G053300::chr7H:208345027-208348608	148.789783670077	-0.919283856259041	0.235700835954334	-3.90021466210306	9.61074361239849e-05	0.00170960655832733
gene:HORVU7Hr1G098510::chr7H:598298769-598302777	175.701890817995	-0.919244266713571	0.213599960133599	-4.30357883090715	1.68061010807526e-05	0.000421174113616095
gene:HORVU2Hr1G080050::chr2H:579376826-579384098	261.2244122841	-0.918624908230891	0.148923085662602	-6.16845201765503	6.89617694727047e-10	6.11810196174299e-08
gene:HORVU2Hr1G091320::chr2H:647661432-647668395	186.267921986021	-0.918457291240734	0.293661987491706	-3.12760020146181	0.00176239733878959	0.0173890973464993
gene:HORVU3Hr1G059290::chr3H:449074316-449092625	511.326399590231	-0.916561896810482	0.133397658687363	-6.87089942829194	6.37983621413239e-12	9.18783809851696e-10
gene:HORVU6Hr1G004010::chr6H:8773655-8936829	330.514975014245	-0.916372009658808	0.304553674120982	-3.00890150908108	0.0026219409886659	0.0236098206542566
gene:HORVU3Hr1G105190::chr3H:667718876-667723692	340.546938963958	-0.914983790419383	0.232777926345984	-3.93071544532715	8.46934619879911e-05	0.00153118205654299
gene:HORVU4Hr1G054780::chr4H:458379100-458381186	110.629359924747	-0.914343532408236	0.267084653788592	-3.42342219756278	0.000618379508071215	0.00772093084127398
gene:HORVU2Hr1G019500::chr2H:50740756-50741863	148.961713861764	-0.913184352292495	0.204800087726564	-4.45890606019524	8.23790131491456e-06	0.000236303019164248
gene:HORVU2Hr1G075010::chr2H:540896617-540904955	120.113113487462	-0.912891683959649	0.303931874415282	-3.00360627103002	0.00266800352813081	0.0238915852565922
gene:HORVU6Hr1G058780::chr6H:384884407-384886037	127.060288671693	-0.911649298025724	0.231743726289362	-3.93386829763586	8.35895968603838e-05	0.00151644077962591
gene:HORVU7Hr1G034290::chr7H:71565246-71568208	89.6122652112285	-0.909336277668843	0.258128439196218	-3.52280547041004	0.000427004649434159	0.00574420969865812
gene:HORVU3Hr1G081590::chr3H:595221826-595227988	83.9033863803797	-0.909323675215649	0.240573882936446	-3.77981044374576	0.000156947798036968	0.00258619467204176
gene:HORVU1Hr1G068030::chr1H:479986104-479991327	380.695880955098	-0.909263403500072	0.267579134434928	-3.3981102652875	0.000678530656608139	0.00829626351370568
gene:HORVU5Hr1G098170::chr5H:606498541-606502938	77.1992682940462	-0.908418465402192	0.279080116231741	-3.25504546030741	0.00113374216551809	0.0123003419877107
gene:HORVU6Hr1G024770::chr6H:87783467-87785015	142.43237731124	-0.908384404226237	0.248978615245598	-3.64844347507592	0.000263833933766137	0.00391487105953902
gene:HORVU2Hr1G121080::chr2H:750744194-750750459	122.41382741064	-0.907546951269489	0.254329034208073	-3.56839695513098	0.000359172059329231	0.0050079255434061
gene:HORVU1Hr1G091250::chr1H:547777416-547779556	36.3519683019555	-0.90582397846768	0.318071186961299	-2.84786555840374	0.00440135134389267	0.0347774571051061
gene:HORVU1Hr1G091850::chr1H:549111087-549112513	78.7171942721179	-0.904992491655305	0.329862517604698	-2.74354448703939	0.00607798120458407	0.0444394942602397
gene:HORVU3Hr1G069970::chr3H:529838596-529843073	523.558741527377	-0.903137541335506	0.201455838524453	-4.48305468806695	7.35820621345183e-06	0.000215087939962417
gene:HORVU1Hr1G069000::chr1H:482822750-482824180	121.812268372267	-0.902369573249708	0.295969362510111	-3.04886142807731	0.00229710411718039	0.021399606188673
gene:HORVU2Hr1G074690::chr2H:538569320-538572019	81.2684526369364	-0.901850820545171	0.312460380970947	-2.88628855198453	0.00389814584184385	0.0317223794270347
gene:HORVU5Hr1G118270::chr5H:652241029-652246973	3832.69974973896	-0.901290118504564	0.178210112338195	-5.05745777654951	4.24882462323406e-07	1.838184907986e-05
gene:HORVU6Hr1G073730::chr6H:510606866-510609386	196.368173764531	-0.90087914107938	0.194413024284904	-4.63384150518218	3.58941848295221e-06	0.000118108158094762
gene:HORVU2Hr1G098390::chr2H:682650747-682660288	279.325123423832	-0.900115165808379	0.201261145168359	-4.47237426307704	7.73558858080477e-06	0.000224147084675391
gene:HORVU1Hr1G055900::chr1H:409516399-409520227	221.956715705097	-0.898858771571724	0.201792416304728	-4.45437340030832	8.41385581645742e-06	0.000239715084548555
gene:HORVU5Hr1G120810::chr5H:658399784-658400880	44.8716065396433	-0.898685879043773	0.26732467355038	-3.36177677544009	0.00077442701383127	0.00922563827213353
gene:HORVU3Hr1G018810::chr3H:49045403-49047636	158.258129218531	-0.898576998675053	0.277446402978355	-3.23874084878713	0.00120058606378836	0.0128465763751725
gene:HORVU3Hr1G078150::chr3H:576753888-576755058	118.474164523038	-0.898313343370213	0.328605695078508	-2.73371203489214	0.00626247873764165	0.0453894787789222
gene:HORVU1Hr1G066240::chr1H:471472631-471476335	110.815330077201	-0.897349321546498	0.218458558747365	-4.10764094889151	3.99720848708151e-05	0.000847092182895391
gene:HORVU4Hr1G008270::chr4H:22383973-22387455	1201.98243989356	-0.897011430077195	0.283759761402885	-3.16116501382171	0.00157139449476166	0.0159229593478837
gene:HORVU4Hr1G008310::chr4H:22665633-22668568	1088.56233000407	-0.896947505600897	0.254822089504279	-3.51989698909457	0.000431714432096321	0.00578167366194729
gene:HORVU1Hr1G059300::chr1H:432303906-432308487	257.541280904776	-0.896696043680986	0.273966695659919	-3.27301112830909	0.00106408288044262	0.0117138254681604
gene:HORVU4Hr1G054480::chr4H:455342829-455351656	65.3397935057496	-0.896466009958732	0.286865579131787	-3.12503860753156	0.00177781724844893	0.0175017614309372
gene:HORVU7Hr1G088730::chr7H:538834805-538839232	65.1498777541863	-0.896136228423598	0.297067532318747	-3.01660777746006	0.00255620327993799	0.0231766839861907
gene:HORVU5Hr1G063530::chr5H:493092498-493104026	130.184053268644	-0.896134679161031	0.296221493512869	-3.02521828694413	0.00248453740121272	0.0226244622771324
gene:HORVU5Hr1G076100::chr5H:549448691-549451630	33.7959567144462	-0.896027397891319	0.311229671398811	-2.87899091967728	0.00398949820729578	0.0323732489394896
gene:HORVU5Hr1G056130::chr5H:439201625-439207365	202.235028607474	-0.895909174637614	0.270650558438274	-3.31020626673467	0.000932272431563123	0.0106128641830245
gene:HORVU7Hr1G114920::chr7H:640583562-640603386	49.2474135646924	-0.895527975785339	0.331388258695386	-2.70235276080953	0.00688506713703453	0.0486442949002984
gene:HORVU2Hr1G121050::chr2H:750608852-750613984	244.548846974882	-0.894854059561137	0.201845315667581	-4.43336550368537	9.27733904127576e-06	0.000260434353380326
gene:HORVU4Hr1G031770::chr4H:212266869-212267384	62.2691250428693	-0.894365401201664	0.225986515412836	-3.95760516758188	7.57049591566541e-05	0.00140307032397713
gene:HORVU1Hr1G037110::chr1H:252543776-252547756	69.797960492532	-0.892763456442796	0.293066319680661	-3.04628473655927	0.00231688313345581	0.0215171310795238
gene:HORVU7Hr1G059050::chr7H:263166486-263170379	232.242589081838	-0.892272099618511	0.21988269083754	-4.0579460630567	4.95061975118583e-05	0.00100377753990775
gene:HORVU4Hr1G084510::chr4H:629184971-629263041	306.335784629135	-0.890627753597049	0.203787918030375	-4.37036583034475	1.24038550812262e-05	0.000330679562055614
gene:HORVU3Hr1G032540::chr3H:168099545-168103434	89.8331929750997	-0.890214165204799	0.187301737971645	-4.75283451635438	2.00584516813216e-06	7.14828822121133e-05
gene:HORVU5Hr1G117910::chr5H:651486571-651489772	1098.41194487466	-0.889569270763118	0.255125902131573	-3.48678540019175	0.000488863462004908	0.00637645356830967
gene:HORVU6Hr1G004990::chr6H:10691524-10695891	261.5737038914	-0.886175152318268	0.161592512222563	-5.48401123374907	4.15788350750093e-08	2.42843496190874e-06
gene:HORVU1Hr1G085050::chr1H:534801258-534804120	79.5236522481699	-0.884879199281946	0.322473470099058	-2.74403720408419	0.00606886594692863	0.0444146905813779
gene:HORVU5Hr1G027570::chr5H:157477706-157481681	332.165538824089	-0.884039718515871	0.226980980668089	-3.89477442521313	9.82901569250803e-05	0.00173783494098214
gene:HORVU3Hr1G064110::chr3H:489987776-490003929	248.073603836937	-0.883649745071763	0.305693252758043	-2.89064196575897	0.00384455842595606	0.0314347176979598
gene:HORVU4Hr1G014270::chr4H:51877381-51879103	146.177218849806	-0.883220177724144	0.170236425341455	-5.18819739049742	2.12339464347031e-07	1.01932638752527e-05
gene:HORVU1Hr1G092890::chr1H:551611576-551617874	50.2188763932527	-0.882052433025306	0.307652606222494	-2.86704034090777	0.00414330195082551	0.0332845193746949
gene:HORVU3Hr1G074090::chr3H:556826162-556826473	124.030786480282	-0.881394298970494	0.288948957768644	-3.0503460049723	0.00228577865946309	0.0213224410354352
gene:HORVU4Hr1G073500::chr4H:590128097-590129498	206.425799169425	-0.880043881601841	0.159390143760134	-5.52131932904344	3.36463662373816e-08	1.99281266621743e-06
gene:HORVU2Hr1G116910::chr2H:739142705-739147950	277.288606144714	-0.879188590485426	0.256214422565684	-3.43145628447218	0.000600349881805369	0.00754081072274451
gene:HORVU7Hr1G085060::chr7H:512771431-512774201	167.017888597158	-0.878806336101369	0.214606136070676	-4.09497301517955	4.2221756188059e-05	0.000885099347567427
gene:HORVU6Hr1G059520::chr6H:394063580-394066645	97.3820944972842	-0.877987354712724	0.251071594675086	-3.49696012346174	0.000470592170654719	0.00621134399258388
gene:HORVU1Hr1G033390::chr1H:213203277-213205645	107.702662108732	-0.877651864906219	0.222607419209684	-3.94259934382294	8.06032453840196e-05	0.00147499028498207
gene:HORVU3Hr1G105880::chr3H:670202292-670214724	164.119500901146	-0.8765451238926	0.218070584710247	-4.01954773064545	5.83099681975934e-05	0.00114823383407886
gene:HORVU7Hr1G000260::chr7H:276440-280388	999.258067997138	-0.874838450886897	0.301842289368404	-2.89832963007759	0.00375156069586602	0.0310064132041191
gene:HORVU1Hr1G069100::chr1H:482935855-482945434	513.1993619263	-0.874346210012125	0.235343189400154	-3.71519656991422	0.000203045787725897	0.00318600054680949
gene:HORVU6Hr1G071200::chr6H:495786696-495792771	56.065614633099	-0.873047914699012	0.275674794100429	-3.16694864159745	0.00154047521870459	0.0157051541459653
gene:HORVU3Hr1G047690::chr3H:326284203-326285298	35.8035231838229	-0.872504286118438	0.291952716127465	-2.988512310115	0.00280339206973446	0.024858660607656
gene:HORVU2Hr1G094040::chr2H:662052947-662056833	77.543640770061	-0.871537376471359	0.312973795011842	-2.78469760204167	0.00535776642614904	0.0404432247063054
gene:HORVU4Hr1G068420::chr4H:565612587-565621685	37.083830419661	-0.8712366873567	0.290984097421713	-2.99410412828866	0.00275251988328166	0.0244608973228573
gene:ENSRNA049489216::chr7H:3996487-3996780	381.450351179232	-0.871042824599694	0.206701996916392	-4.21400294914432	2.50884006687652e-05	0.000579679903803799
gene:HORVU5Hr1G059070::chr5H:461302720-461305976	65.4528516569889	-0.869888758250958	0.285987094165794	-3.04170634268783	0.00235241269170226	0.021722366822895
gene:HORVU6Hr1G008880::chr6H:16128708-16132851	1997.21207894788	-0.869371241856521	0.184584602549057	-4.70987953410398	2.47863248857552e-06	8.57166557644555e-05
gene:HORVU7Hr1G116780::chr7H:644139178-644259414	149.00517745279	-0.869333670779103	0.277850643682144	-3.12878048169506	0.00175533392181039	0.0173519751010744
gene:HORVU4Hr1G070260::chr4H:574816252-574833583	80.4673454983824	-0.869109920189331	0.254151254593823	-3.41965622628271	0.000627003178244321	0.00780080995607402
gene:HORVU4Hr1G077310::chr4H:603804857-603810939	1484.01507272213	-0.867674682018298	0.157045393462109	-5.52499288829917	3.29498957699003e-08	1.96819462630092e-06
gene:HORVU7Hr1G003100::chr7H:5924925-5929135	49.8428493782016	-0.867587249752961	0.282663177740741	-3.06933240009321	0.0021453774322867	0.0202470175133011
gene:HORVU7Hr1G030370::chr7H:60218962-60225059	114.736252812385	-0.866829794494138	0.237899193293706	-3.6436853042371	0.000268761997078379	0.00395727573569328
gene:HORVU4Hr1G010390::chr4H:30941252-30945750	1152.46644081122	-0.866807124041977	0.142831875447239	-6.06872325472031	1.28931094937434e-09	1.08004191320896e-07
gene:HORVU0Hr1G002360::chrUn:10766303-10766807	88.3090206991014	-0.86616263811657	0.316954842608178	-2.73276354129514	0.00628054036270789	0.0454733614553361
gene:HORVU6Hr1G033060::chr6H:148634735-148641484	560.751180724564	-0.86460437022637	0.291669390507547	-2.96433015724356	0.00303342640954713	0.0264102789594774
gene:HORVU7Hr1G101220::chr7H:607846214-607848106	64.0887312115726	-0.864563411798729	0.240822810407506	-3.59003954125345	0.000330627802966455	0.00466875767976674
gene:HORVU5Hr1G117900::chr5H:651481516-651485571	455.639738429435	-0.863120835847764	0.198042284925854	-4.35826538847961	1.31097355435208e-05	0.000342497624701977
gene:HORVU5Hr1G065520::chr5H:501474162-501476279	81.2903460213132	-0.862490867332051	0.24532206649626	-3.51574923385541	0.000438514955906701	0.00585782430933564
gene:HORVU2Hr1G064290::chr2H:436135271-436136825	191.24884186686	-0.862176540851527	0.246523941443808	-3.49733391329883	0.00046993322631829	0.00620654272397511
gene:HORVU0Hr1G038350::chrUn:246871943-246877906	60.4577847428921	-0.861952530883862	0.280452958518194	-3.07342998069298	0.00211613340610236	0.0200512938245643
gene:HORVU3Hr1G016770::chr3H:41107377-41108005	325.740875447866	-0.861151993566745	0.263135932674189	-3.27265069736033	0.00106544058846896	0.011722634125143
gene:HORVU3Hr1G020880::chr3H:65978344-65981868	52.7494701661168	-0.860971654335353	0.311132559183733	-2.76721811627219	0.0056536914804268	0.0421426934359136
gene:HORVU6Hr1G069480::chr6H:482169905-482172190	37.5206073785019	-0.860831790181275	0.283936909401192	-3.03177136074603	0.00243123281774936	0.0222935461081544
gene:HORVU5Hr1G114920::chr5H:645054200-645153215	64.3134096634843	-0.860774196105058	0.31434674631631	-2.73829523032157	0.00617586069738617	0.0449631741770227
gene:HORVU3Hr1G001040::chr3H:2363886-2366504	96.919797279125	-0.860216356443201	0.235650361845784	-3.65039268221515	0.000261839694984021	0.00389903783763033
gene:HORVU7Hr1G109180::chr7H:627298806-627305366	207.004744150477	-0.859480106573895	0.252110407721126	-3.40914171034389	0.000651676180929428	0.00802233218982562
gene:HORVU1Hr1G001850::chr1H:4131049-4132649	450.958216744094	-0.859082340651458	0.246607128769539	-3.48360708361474	0.000494705173826431	0.00644066314852913
gene:HORVU6Hr1G023100::chr6H:74453578-74491625	74.5962529560999	-0.857356703622718	0.224079221872421	-3.82613209943603	0.000130172454595568	0.00221619921483921
gene:HORVU2Hr1G064150::chr2H:434801910-434803617	408.291717534265	-0.855838602941607	0.258764621919545	-3.3074019029066	0.000941656859042123	0.0106907543834879
gene:HORVU2Hr1G091850::chr2H:649733129-649736343	59.3431801865687	-0.853875619244809	0.271666018894122	-3.1431079334865	0.00167164188357182	0.0167611696528393
gene:HORVU2Hr1G036590::chr2H:163406197-163408608	269.957424532179	-0.853754482004668	0.248737242484264	-3.43235485558091	0.000598364071720964	0.00753365447425448
gene:HORVU2Hr1G104100::chr2H:702028046-702028988	1482.8079369921	-0.852183924144306	0.29110354229979	-2.92742547002981	0.00341780965949665	0.0289186583100911
gene:HORVU5Hr1G014300::chr5H:50382306-50386392	565.945313797784	-0.851772333273117	0.247965429820191	-3.43504469107153	0.000592456114354371	0.00746821478442146
gene:HORVU3Hr1G083370::chr3H:603108009-603110609	517.83229351814	-0.851124072735522	0.188892896735853	-4.5058553680064	6.61061044373961e-06	0.000195767176324041
gene:HORVU5Hr1G065200::chr5H:498851435-498856020	62.0862866099353	-0.849977718653072	0.280555199546552	-3.02962739605913	0.00244855612622242	0.0223812564287645
gene:HORVU7Hr1G103060::chr7H:613034341-613036176	125.013015596002	-0.849427221268472	0.252797833124287	-3.3601048346441	0.000779129017277231	0.00927631184443435
gene:HORVU7Hr1G051430::chr7H:193292319-193296158	123.125719203571	-0.846796508761181	0.26036155500584	-3.25238689230515	0.00114440132858854	0.0123966065373623
gene:HORVU7Hr1G074660::chr7H:428023559-428028502	349.065706760044	-0.846783630944741	0.314775773763529	-2.6901169070936	0.00714269917775099	0.0499775018007961
gene:HORVU3Hr1G089690::chr3H:629445056-629449493	113.751351245165	-0.844053259547867	0.249543889746647	-3.38238399828104	0.000718596197030528	0.00868345036710568
gene:HORVU1Hr1G089310::chr1H:543500068-543501098	424.9582807236	-0.840726752796568	0.160487286261717	-5.23858788057231	1.61809920809654e-07	8.02409291260325e-06
gene:HORVU2Hr1G036780::chr2H:165634249-165637643	333.282492898743	-0.840206742773045	0.149959386891954	-5.60289529176599	2.10800579038404e-08	1.30746105453141e-06
gene:HORVU4Hr1G079150::chr4H:611346019-611350289	288.173207232889	-0.838872381259456	0.273032161112485	-3.07243065374212	0.00212323160187113	0.020100435687052
gene:HORVU5Hr1G097060::chr5H:603081537-603088903	232.823254845892	-0.838523470059584	0.216935847731608	-3.86530616690424	0.000110949933018157	0.00192477994359718
gene:HORVU7Hr1G035340::chr7H:77608804-77612709	87.5772333014717	-0.83653547380192	0.270467214331018	-3.09292745840205	0.00198192575272555	0.0189849525634658
gene:HORVU5Hr1G073380::chr5H:538637628-538640823	118.901850646685	-0.836239955831008	0.220063038625617	-3.80000185880222	0.000144695002510887	0.00241456914507453
gene:HORVU6Hr1G026680::chr6H:102523102-102527979	153.676120216065	-0.835867016415793	0.179436475023331	-4.65828932666621	3.18847880158091e-06	0.000106583394725024
gene:HORVU7Hr1G057310::chr7H:248143263-248146274	89.4041323407884	-0.835520970367765	0.21112352175781	-3.95749826173433	7.57388384720842e-05	0.00140307032397713
gene:HORVU6Hr1G081670::chr6H:546165125-546169774	55.0493482632281	-0.833408443684267	0.304186820991377	-2.73979142478329	0.00614781850584953	0.0448210928932012
gene:HORVU6Hr1G051470::chr6H:313379082-313383224	200.065567288987	-0.832410510576638	0.141971257036207	-5.86323265676478	4.53941466083038e-09	3.39664529034234e-07
gene:HORVU5Hr1G070040::chr5H:526801263-526802351	201.086051387567	-0.828951067935674	0.236940062509945	-3.49856862176223	0.000467762703681036	0.00618564692301727
gene:HORVU5Hr1G095990::chr5H:600133347-600140149	206.86275240289	-0.825557216497937	0.223554427553314	-3.69286900524954	0.000221738255900219	0.00343571744182609
gene:HORVU7Hr1G102150::chr7H:611193339-611196346	160.526763284728	-0.824867131086145	0.211775976229804	-3.89499860074335	9.81992966540226e-05	0.00173783494098214
gene:HORVU5Hr1G092920::chr5H:589784546-589791911	224.946234643569	-0.824104295668827	0.246095266437259	-3.34872063002044	0.000811856125513873	0.00955237095414365
gene:HORVU7Hr1G078320::chr7H:459752087-459754054	241.497424907959	-0.818474721842459	0.221904603656862	-3.6884080291912	0.000225661565754333	0.00348367113182863
gene:HORVU2Hr1G123200::chr2H:754872591-754876472	144.485059833692	-0.818246074093983	0.296751416011501	-2.75734513786539	0.00582728084431684	0.0429917131948379
gene:HORVU4Hr1G001170::chr4H:1791487-1792119	571.813115401062	-0.817930105456055	0.217649633684299	-3.75801278233467	0.000171268134266303	0.0027653588298911
gene:HORVU3Hr1G076190::chr3H:567955173-567960169	88.8849978131856	-0.817790513044086	0.268599891796597	-3.04464200478299	0.00232957424486038	0.0215683082661534
gene:HORVU6Hr1G050750::chr6H:308229801-308235056	2754.01136934482	-0.816380957397681	0.178335986012726	-4.57776905071433	4.69961130810479e-06	0.000147044683577695
gene:HORVU5Hr1G069180::chr5H:521145610-521149988	89.0093666502712	-0.816205541051799	0.289834918458128	-2.81610492411981	0.00486097883464172	0.0374384399183798
gene:HORVU5Hr1G097010::chr5H:602893325-602899111	260.115189621952	-0.815261598535991	0.177595345599194	-4.59055723439912	4.42064212605179e-06	0.000140193697348967
gene:HORVU5Hr1G047820::chr5H:371257295-371263036	115.30007303993	-0.814027725970568	0.202923172106349	-4.01150700297523	6.0332387032361e-05	0.00117567077825989
gene:HORVU4Hr1G061850::chr4H:519455834-519459614	131.842829408432	-0.813071990609283	0.206684071641406	-3.93388800671564	8.35827393483377e-05	0.00151644077962591
gene:HORVU0Hr1G012910::chrUn:74382764-74385269	31.9346343315956	-0.812049623310946	0.282320390036433	-2.87634068232249	0.00402315231196365	0.032585054126097
gene:HORVU1Hr1G026330::chr1H:131936800-131938102	267.543670329389	-0.8116870363192	0.218874857868016	-3.70845260266785	0.000208529682779375	0.00325584086057879
gene:HORVU7Hr1G049080::chr7H:170173102-170175173	58.6615695668914	-0.811591158764334	0.290760405147315	-2.79127124738025	0.00525014539671121	0.0398662178083243
gene:HORVU4Hr1G062500::chr4H:523373073-523374270	37.2187729043124	-0.811539799803559	0.274243900364844	-2.95918997186051	0.00308448890522978	0.0267220699305156
gene:HORVU5Hr1G088020::chr5H:580434018-580436681	43.4499089808106	-0.811535800135961	0.266538068390506	-3.04472755068884	0.00232891178208159	0.0215683082661534
gene:HORVU6Hr1G062220::chr6H:417007969-417010297	135.712591502354	-0.811274647499433	0.284170362978214	-2.85488831064916	0.0043051966233512	0.0341976064233405
gene:HORVU4Hr1G006740::chr4H:15524764-15527575	34.1484431513636	-0.810732374507809	0.298551494532001	-2.71555289240365	0.00661652065033826	0.0472550826066618
gene:HORVU5Hr1G118080::chr5H:651947532-651949994	129.070655211222	-0.810207009783487	0.216114061320877	-3.74897868667846	0.000177556172570341	0.00285420189943729
gene:HORVU1Hr1G013210::chr1H:34083561-34088731	325.841117212582	-0.809897046377459	0.184554618261392	-4.38838677680973	1.14194558417566e-05	0.000309813520682288
gene:HORVU2Hr1G116130::chr2H:736943421-736944759	74.5102902819863	-0.808313049418493	0.229820655601578	-3.51714708716087	0.000436211987907473	0.00583076494452799
gene:HORVU7Hr1G090240::chr7H:548933249-548935805	414.57098033362	-0.808151572679835	0.173085488401443	-4.66908913129367	3.02538109050061e-06	0.000101454007669643
gene:HORVU6Hr1G003500::chr6H:7916347-7924212	245.489059959819	-0.80792527154499	0.174296332174299	-4.63535440744129	3.56326448976173e-06	0.00011743134664848
gene:HORVU7Hr1G097550::chr7H:592692703-592694929	126.802536959883	-0.807531631158513	0.232713245284644	-3.47007163331326	0.000520319576537098	0.00672004878149202
gene:HORVU5Hr1G075430::chr5H:547123282-547125985	177.254847925152	-0.807150666346789	0.188894167616611	-4.27303117153422	1.9283348697382e-05	0.000470907885843383
gene:HORVU7Hr1G056600::chr7H:237946752-237949777	42.3614257380094	-0.805669328584251	0.260072529788735	-3.09786400447107	0.00194920854455767	0.0187312883262658
gene:HORVU2Hr1G073410::chr2H:528993912-528995914	55.1135222674441	-0.805610966729619	0.21588315576903	-3.73169904738437	0.000190192641574845	0.00302038556023617
gene:HORVU6Hr1G080690::chr6H:542481080-542483929	193.213960049738	-0.804294352985114	0.227687149204237	-3.53245387715604	0.000411722039816634	0.0055886814778467
gene:HORVU7Hr1G089510::chr7H:543727929-543729952	193.009601266915	-0.803997329938026	0.27687367357991	-2.90384173960107	0.00368614438406579	0.0306248941128599
gene:HORVU3Hr1G111160::chr3H:682775527-682783431	600.846355071488	-0.803234048033853	0.218745538759929	-3.67200196441672	0.00024065783210775	0.00365876469840749
gene:HORVU0Hr1G019500::chrUn:103253114-103254413	57.3876687813776	-0.80313102171091	0.288726288864727	-2.78163455384968	0.00540859051418537	0.0406727905791377
gene:HORVU1Hr1G063410::chr1H:455156107-455159755	249.628417564031	-0.803028949514202	0.223137653095247	-3.59880521451674	0.000319682512157227	0.004526359933076
gene:HORVU5Hr1G089970::chr5H:585768790-585771108	336.965488601538	-0.802870705610217	0.152118577331356	-5.27792673120619	1.30653682200993e-07	6.65163274081857e-06
gene:HORVU6Hr1G031530::chr6H:134063086-134068659	239.362476644481	-0.802597723557846	0.21239923322377	-3.77872232105603	0.000157635081333226	0.00259194788824356
gene:HORVU7Hr1G095220::chr7H:580561802-580564945	60.2114344493515	-0.801476554182139	0.264485649051858	-3.03032152048822	0.00244293525069393	0.0223509271538745
gene:HORVU6Hr1G022380::chr6H:70919653-70923215	254.906727138981	-0.800951447172725	0.180639439585247	-4.43397880890094	9.25097232307268e-06	0.000260041369070757
gene:HORVU6Hr1G013670::chr6H:28338836-28346462	1886.21023166435	-0.800027304176392	0.205822022742409	-3.88698591878889	0.000101496639347835	0.00178732691702477
gene:HORVU7Hr1G037420::chr7H:89927727-89940090	2792.13120231886	-0.79964739419104	0.175039885661732	-4.56837246646957	4.9152599934992e-06	0.00015243105696654
gene:HORVU4Hr1G008120::chr4H:21743832-21748136	66.9775047781533	-0.799632369886159	0.213051793909775	-3.75322993161369	0.000174570593068025	0.00281050634751018
gene:HORVU1Hr1G048340::chr1H:356712295-356717513	135.638982908675	-0.799443757788178	0.288196706647973	-2.7739517466613	0.0055379891773216	0.0414826364240698
gene:EPlHVUG00000039905::Mt:129051-129173	1113.23889830721	-0.798578926237736	0.16370832850336	-4.87805925048796	1.07134745732715e-06	4.11061161273006e-05
gene:HORVU2Hr1G098400::chr2H:682661391-682672121	142.194111175326	-0.797978435025741	0.203086863541319	-3.92924692966854	8.52123025173854e-05	0.0015392387222771
gene:HORVU5Hr1G103850::chr5H:617239681-617249051	476.908939372968	-0.797810366253379	0.247920472347833	-3.21800922165899	0.00129083667660064	0.0135938918139724
gene:HORVU5Hr1G078180::chr5H:554678710-554684004	77.139909773446	-0.797127655269226	0.290297326384832	-2.74590078109268	0.00603450106218897	0.0442403833101762
gene:HORVU2Hr1G067330::chr2H:471607629-471723505	206.898805212275	-0.796650577040507	0.238658683182585	-3.33803307056309	0.000843737066909036	0.0098448477074525
gene:ENSRNA049480422::chr5H:630300652-630300871	194.958375677972	-0.795821160222933	0.29525487857869	-2.69537006146652	0.00703104949836074	0.0494100423638145
gene:HORVU2Hr1G095260::chr2H:669081622-669082470	40.4112374569361	-0.795074481048943	0.287997508971179	-2.76069915982679	0.00576777790997849	0.0427470209147719
gene:HORVU4Hr1G073020::chr4H:587541442-587549176	138.744079740403	-0.792939904949764	0.247649125903257	-3.20186837751861	0.0013653937062632	0.0142122614197476
gene:HORVU1Hr1G087050::chr1H:538582519-538585595	65.4713155058704	-0.792273275821232	0.286006061545363	-2.77012756841719	0.00560343414974701	0.041883329695194
gene:HORVU2Hr1G005990::chr2H:12800338-12809306	94.2590935754911	-0.791565745465227	0.254273517247383	-3.11304831912602	0.00185165699595949	0.0180831119354594
gene:HORVU5Hr1G106140::chr5H:623525612-623532784	55.8491023786615	-0.790916588411859	0.262819129462025	-3.00935700544636	0.00261801284481956	0.0235946584119915
gene:HORVU2Hr1G112420::chr2H:725773695-725778133	79.0861393017608	-0.789919257814261	0.196417306393014	-4.02163776868877	5.77948887249537e-05	0.00114142207136636
gene:HORVU6Hr1G073370::chr6H:508572865-508575676	77.546659183386	-0.789368531484915	0.206192870409354	-3.82830177356658	0.000129030491437594	0.0022003204484727
gene:HORVU4Hr1G069390::chr4H:570517704-570523156	58.3935178298724	-0.789067923232467	0.272978537039217	-2.89058594785826	0.00384524369443321	0.0314347176979598
gene:HORVU3Hr1G017020::chr3H:42858730-42865946	647.584582117521	-0.786473151147253	0.25995100269702	-3.02546688794237	0.00248249585191928	0.0226156662835593
gene:HORVU3Hr1G039200::chr3H:231184798-231186395	201.58372702665	-0.785900941265697	0.25913483446605	-3.03278771024766	0.00242305993268154	0.0222282976197915
gene:HORVU7Hr1G075240::chr7H:435465263-435467893	167.713665796118	-0.784867763546409	0.143922405667969	-5.45340914712829	4.94131973092077e-08	2.80800509898217e-06
gene:HORVU4Hr1G015820::chr4H:63355854-63357280	281.690357201029	-0.78447858446409	0.232052972730206	-3.3806013137188	0.000723274050881521	0.00872493413300909
gene:HORVU6Hr1G014700::chr6H:31518732-31527333	151.976925130577	-0.784140668560052	0.266187998451695	-2.94581526260039	0.00322104713946085	0.0276206105849526
gene:HORVU3Hr1G092250::chr3H:637568065-637574970	307.672656297961	-0.783622266152612	0.253482235306686	-3.09142873544773	0.00199195790755944	0.0190463424121623
gene:HORVU6Hr1G031340::chr6H:132176986-132188250	118.338086824135	-0.782856303838446	0.274962400489396	-2.84713947232446	0.0044114030470677	0.0348176278031702
gene:HORVU5Hr1G093580::chr5H:592329144-592331571	191.410439209639	-0.782675931217224	0.230362764212012	-3.39758004682083	0.000679846953016022	0.00829626351370568
gene:HORVU4Hr1G024380::chr4H:138279488-138284595	144.204323778955	-0.779474905817009	0.191137919720381	-4.07807570029703	4.54099825201434e-05	0.000938830179418422
gene:ENSRNA049459487::chr4H:1792409-1792529	130.70541051396	-0.778330872986042	0.261279314793261	-2.97892266596726	0.00289263774506704	0.0254692634957201
gene:HORVU6Hr1G027620::chr6H:109117474-109121246	976.994821808456	-0.778072129765202	0.212995215395231	-3.65300285417877	0.000259191349131822	0.00387607205323306
gene:HORVU1Hr1G092820::chr1H:551525189-551526614	223.301750420436	-0.776411786669754	0.19306959998039	-4.02140879117487	5.78511081883182e-05	0.00114142207136636
gene:HORVU3Hr1G079210::chr3H:582465118-582489800	233.416088574187	-0.773224847098854	0.170699718763726	-4.52973708860712	5.90571296070856e-06	0.000178154262140399
gene:HORVU5Hr1G093280::chr5H:591243631-591252707	117.556047753465	-0.772795802469589	0.194616848319112	-3.9708576577216	7.16143588663173e-05	0.0013384564529095
gene:HORVU2Hr1G116620::chr2H:738479544-738481023	149.172465011125	-0.771724535112195	0.285220763868446	-2.70570951653486	0.0068158637615718	0.0482851588446121
gene:HORVU3Hr1G048560::chr3H:335669262-335675230	238.947099198369	-0.77085714930314	0.173131662231887	-4.45243313306078	8.49026841245193e-06	0.00024123835627056
gene:HORVU2Hr1G063510::chr2H:429178479-429180159	123.312156939214	-0.769640738650748	0.235901255120928	-3.26255465769444	0.00110412878798024	0.0120599542317259
gene:HORVU1Hr1G036200::chr1H:242025815-242029722	59.5948089430662	-0.769010957695407	0.215604049149553	-3.56677418967204	0.000361402643636179	0.00503568720019504
gene:HORVU0Hr1G038120::chrUn:243875340-243882609	328.0208806332	-0.76764070230086	0.249184777200997	-3.08060833781057	0.00206578186646593	0.0196183963524447
gene:HORVU2Hr1G002600::chr2H:5689543-5692391	62.7629051313711	-0.767358305002388	0.252962474519006	-3.03348671166139	0.00241745357693564	0.0221909785190452
gene:ENSRNA049486150::chr6H:93640821-93641018	3144.88538977108	-0.765300047205384	0.244147874879769	-3.13457591053068	0.00172102719112202	0.0171336731631305
gene:HORVU4Hr1G063640::chr4H:532182574-532185753	66.1331346954144	-0.764219628981913	0.27978124606023	-2.73148983265804	0.00630486863342667	0.0455710443060946
gene:HORVU2Hr1G112320::chr2H:725532539-725539030	149.457500087826	-0.763518738265442	0.254613426724499	-2.99873713687376	0.00271101092700567	0.0241504624463858
gene:HORVU5Hr1G093640::chr5H:592408068-592409479	201.256947413147	-0.759360634057526	0.232549360969683	-3.2653739872307	0.00109319634621078	0.0119841221978248
gene:HORVU0Hr1G016330::chrUn:87346259-87350619	3031.87179881185	-0.759333206307102	0.174679419301052	-4.34701013631391	1.38005843936598e-05	0.000355601822868984
gene:HORVU2Hr1G006030::chr2H:12867239-12870499	854.395616341691	-0.757321167966787	0.111427015645478	-6.79656691494206	1.07141554060835e-11	1.42579640233108e-09
gene:HORVU3Hr1G023400::chr3H:86467301-86469633	139.913806131508	-0.757011694315949	0.190363610078505	-3.97666178952878	6.98894545823079e-05	0.00131225748778334
gene:HORVU6Hr1G030390::chr6H:126211479-126217428	461.780739985809	-0.756674541519917	0.26689380900799	-2.83511462604689	0.00458092460617225	0.0358461186339329
gene:HORVU5Hr1G056280::chr5H:440157126-440167130	390.434194252311	-0.755602980026216	0.237417184417725	-3.18259599396464	0.00145961122640068	0.0149925674872011
gene:HORVU1Hr1G052040::chr1H:385752911-385757976	905.947065648623	-0.754585408049591	0.138443910541092	-5.4504774178971	5.02347815056711e-08	2.84699869525132e-06
gene:HORVU5Hr1G038070::chr5H:275023645-275027405	37.4112213299637	-0.754032564242144	0.260941780107167	-2.88965823691579	0.00385660855577113	0.0314908937839393
gene:HORVU0Hr1G001270::chrUn:6659848-6662434	705.506518210675	-0.753791209809736	0.175607895567833	-4.29246764430683	1.76698305566833e-05	0.000438120114722668
gene:HORVU5Hr1G114850::chr5H:644820889-644825705	85.4042640582842	-0.753654542471843	0.24373651128324	-3.09208718260532	0.00198754466614229	0.0190214447657295
gene:HORVU4Hr1G009520::chr4H:27194624-27198021	2314.27418664526	-0.750001085806083	0.17564470330944	-4.26998976726771	1.95481935905062e-05	0.00047407187823989
gene:HORVU7Hr1G109810::chr7H:628962353-628967760	188.161685590663	-0.74976372462642	0.14154353509704	-5.2970538294977	1.17686010742047e-07	6.07118852031979e-06
gene:HORVU3Hr1G096510::chr3H:653361014-653366028	267.484976990419	-0.748260370059862	0.187183575231254	-3.99746809588092	6.40236168460004e-05	0.00122937038155617
gene:HORVU7Hr1G018780::chr7H:25253830-25269259	79.5331057216437	-0.746198501884656	0.25795268699925	-2.89277274280467	0.00381857480617616	0.0313018923487953
gene:HORVU4Hr1G003600::chr4H:7870079-7872450	130.252508127249	-0.746164659296048	0.250233832853272	-2.98186960087676	0.00286493997687858	0.0252465330904648
gene:HORVU2Hr1G029350::chr2H:104599636-104603903	348.672855359162	-0.745846148770309	0.225222149809464	-3.31160211995707	0.000927633763342611	0.0105715054244129
gene:HORVU4Hr1G007180::chr4H:18757955-18759848	466.918188198692	-0.745035192486334	0.245514967198625	-3.03458156130902	0.0024086961703328	0.0221254895925808
gene:HORVU5Hr1G022100::chr5H:109950223-109954657	559.871784876401	-0.743153564928033	0.148981399683003	-4.98823052078507	6.09348334086933e-07	2.52705287426269e-05
gene:HORVU5Hr1G088290::chr5H:581313441-581318289	241.228041527047	-0.742526652517262	0.145368878381773	-5.10787907826608	3.25795026413902e-07	1.46999275222719e-05
gene:HORVU5Hr1G095910::chr5H:600005693-600016246	905.628296287302	-0.740101800579656	0.1686044629462	-4.38957420015516	1.13572822016301e-05	0.000308923952873835
gene:HORVU6Hr1G056110::chr6H:359587381-359590244	131.883787428055	-0.73929482987394	0.255923608664224	-2.88873243751383	0.00386798041305681	0.0315541374937715
gene:HORVU6Hr1G067670::chr6H:469170917-469174364	132.043771842337	-0.735934769091375	0.211394851794238	-3.48132777522747	0.000498934525423863	0.00648368191073062
gene:HORVU1Hr1G065070::chr1H:465597321-465603798	87.3104695907008	-0.735626712757181	0.224701641720181	-3.27379322699053	0.00106114229435701	0.0116875735364854
gene:HORVU4Hr1G058210::chr4H:486721583-486731458	786.633203374109	-0.733275841272715	0.136608512234284	-5.36771705715634	7.97395158922058e-08	4.27704862538142e-06
gene:HORVU5Hr1G028180::chr5H:165424399-165426342	217.952293473334	-0.73192458242953	0.266783736121703	-2.7435127533248	0.00607856870029722	0.0444394942602397
gene:HORVU7Hr1G084290::chr7H:507348832-507350965	107.533651676287	-0.730508501786682	0.200556267760663	-3.64241172785707	0.000270095611012203	0.00397134987212768
gene:HORVU3Hr1G054090::chr3H:399269094-399271685	116.759788302528	-0.725931809101429	0.192325631804186	-3.77449330227875	0.000160333215612947	0.00261861469028441
gene:HORVU2Hr1G038030::chr2H:175815314-175819216	54.7602325878907	-0.725810098298871	0.269313935312627	-2.69503357654453	0.00703815383643646	0.0494269280443931
gene:HORVU4Hr1G081110::chr4H:618418943-618420337	55.6123850480152	-0.724330154604124	0.267704245853713	-2.70571037188531	0.00681584620748544	0.0482851588446121
gene:HORVU2Hr1G102620::chr2H:697328576-697332674	658.466062588873	-0.723242384228731	0.204056493164717	-3.54432428496612	0.000393620781046674	0.00536723122067922
gene:HORVU5Hr1G094420::chr5H:595520707-595539223	1013.5361817745	-0.722485134553615	0.230930826884029	-3.12857813009278	0.00175654304849703	0.0173557679218509
gene:HORVU7Hr1G081590::chr7H:486172724-486177147	255.844853634622	-0.722124249894992	0.237141758420757	-3.04511636712139	0.00232590298256346	0.0215683082661534
gene:HORVU3Hr1G083560::chr3H:604283797-604292634	360.815717769521	-0.721827625631456	0.190665773551746	-3.7858269587937	0.000153198256658163	0.0025383345504291
gene:HORVU1Hr1G051330::chr1H:380632607-380635987	114.762131953996	-0.718727916849016	0.251238002958439	-2.86074522319743	0.00422646550913101	0.0336867565560988
gene:HORVU4Hr1G027660::chr4H:169641351-169659789	4160.87059706405	-0.718530948209103	0.261253453391421	-2.75032134075782	0.00595368478716858	0.0438006215307931
gene:HORVU4Hr1G000510::chr4H:735997-738078	124.693928122722	-0.717762111671857	0.196004431115784	-3.66196880134746	0.000250284345906734	0.00377509229342539
gene:HORVU4Hr1G077840::chr4H:605644070-605649078	100.647380824627	-0.717548520600422	0.203066437752421	-3.53356531262571	0.000409994776057473	0.0055724306149867
gene:HORVU6Hr1G017680::chr6H:42338522-42350309	449.775626611612	-0.716876468994868	0.244903661256243	-2.92717742690176	0.00342053682942761	0.0289300914624075
gene:HORVU7Hr1G028590::chr7H:52447836-52454343	560.147682412944	-0.715650395386255	0.18151534825776	-3.94264398165383	8.05882399430672e-05	0.00147499028498207
gene:HORVU3Hr1G012530::chr3H:27032902-27041392	108.275530942938	-0.714805756728614	0.177672483263311	-4.02316522851357	5.74211825412987e-05	0.0011379243959598
gene:HORVU3Hr1G074040::chr3H:556701537-556705081	2585.64471212896	-0.714494206354599	0.171282360879182	-4.17144067075641	3.02679869343118e-05	0.000674883025748504
gene:HORVU7Hr1G055980::chr7H:230562406-230567032	136.579470570971	-0.71319041020107	0.215846288636832	-3.30415878218334	0.000952618615102125	0.0107802793332278
gene:HORVU2Hr1G039570::chr2H:189044132-189055558	95.1658718229531	-0.713081069563694	0.220342316528369	-3.23624204736854	0.00121114636856438	0.0129355798761979
gene:HORVU7Hr1G035670::chr7H:79740679-79746046	132.33735682288	-0.71299579174967	0.197345588278136	-3.61292997715654	0.00030275648323471	0.00433930321505999
gene:HORVU7Hr1G043230::chr7H:129397132-129402457	101.562917561307	-0.71046198922807	0.236028083082173	-3.01007397065002	0.00261184072424892	0.0235612233274852
gene:HORVU7Hr1G028910::chr7H:53818354-53824943	2076.10289200715	-0.710068737031202	0.155647896762038	-4.56201947988279	5.0663945383474e-06	0.000156196497893391
gene:HORVU5Hr1G112280::chr5H:638813468-638816866	224.754828728437	-0.707243970387833	0.216011135261274	-3.27410885338107	0.00105995771210011	0.0116806451020005
gene:HORVU5Hr1G053840::chr5H:423203519-423208403	285.910578401306	-0.70571432664979	0.209282520264003	-3.37206531037353	0.000746067543594274	0.00896389495520755
gene:ENSRNA049488657::chr7H:629279193-629279413	746.484073504135	-0.703972320027864	0.218509538354259	-3.22170064213191	0.00127432202950827	0.0134507504982133
gene:HORVU5Hr1G047890::chr5H:371702568-371711627	88.9013487131997	-0.70136459655311	0.19786330802042	-3.54469256361936	0.000393071267257117	0.00536321639542384
gene:HORVU2Hr1G104110::chr2H:702089079-702093137	293.864437265308	-0.700486945942871	0.160750163297474	-4.35761265540112	1.31488822490943e-05	0.000342587853989414
gene:HORVU5Hr1G058020::chr5H:453862902-453867071	73.386165512532	-0.700465838957323	0.244466949498879	-2.86527827337468	0.00416642935233511	0.0333346056172747
gene:HORVU5Hr1G059910::chr5H:467836848-467839703	50.5360365083938	-0.698799902457324	0.254599547573338	-2.74470205904837	0.0060565856592602	0.0443404491892775
gene:HORVU3Hr1G074680::chr3H:559145073-559148685	178.631852140842	-0.697981884133527	0.137779873915459	-5.06592047371013	4.06431579666991e-07	1.77295236391663e-05
gene:HORVU5Hr1G014710::chr5H:54421543-54424134	66.846233340917	-0.697284714607237	0.204220395261466	-3.4143735434186	0.000639288621241785	0.00791877272561969
gene:HORVU2Hr1G062880::chr2H:424543307-424567473	57.742830318463	-0.696879257116646	0.240567891410642	-2.89680910045927	0.00376979070760837	0.0310959668176436
gene:HORVU1Hr1G072070::chr1H:495888699-495891818	503.301997145328	-0.695801949862726	0.139460312235051	-4.98924703889948	6.06150908118223e-07	2.51876067076952e-05
gene:ENSRNA049488655::chr7H:629282112-629282332	1095.0678097823	-0.695762630065612	0.192960643113083	-3.60572300569016	0.000311285037946363	0.00442833505267946
gene:HORVU2Hr1G087030::chr2H:626110928-626116489	134.513409916064	-0.692083239744843	0.254497378333363	-2.71941205947627	0.00653980821991524	0.0468409576159429
gene:HORVU6Hr1G095100::chr6H:583044413-583049699	64.0472387562619	-0.691712756970989	0.212005768454515	-3.26270724619172	0.00110353452122039	0.0120599542317259
gene:HORVU7Hr1G056430::chr7H:234875146-234878675	167.495991301273	-0.690600839552246	0.158378589503292	-4.36044317428329	1.29799288251777e-05	0.000340719080497112
gene:HORVU7Hr1G001570::chr7H:3430921-3433264	213.099824361802	-0.689630206271028	0.187395931184198	-3.68007032977235	0.00023316963626072	0.00357407416221613
gene:HORVU7Hr1G092550::chr7H:566875124-566878840	760.177380549777	-0.688773732135923	0.207543283216033	-3.31869922005125	0.000904377856129384	0.0103852806133132
gene:HORVU2Hr1G035230::chr2H:147991950-147998288	121.595795920735	-0.688583446976443	0.199675662156825	-3.44850964578563	0.000563689336281789	0.00716406039687739
gene:HORVU3Hr1G073150::chr3H:552521081-552522200	1269.07223314399	-0.687092107397666	0.162576579329641	-4.22626746257538	2.37599561757841e-05	0.000553241238706573
gene:HORVU6Hr1G063490::chr6H:427763183-427766235	3577.33853242847	-0.687085205799344	0.167379201119053	-4.10496167508075	4.04381915386573e-05	0.000853668087642378
gene:HORVU7Hr1G115590::chr7H:641865131-641873438	273.842449099419	-0.686949160606348	0.253424160500182	-2.71066957171929	0.00671475042998889	0.0477781193031967
gene:HORVU7Hr1G103160::chr7H:613141920-613142655	69.3648783805112	-0.685128884975056	0.214334675606461	-3.19653776523318	0.00139087617769946	0.0144275098728707
gene:HORVU6Hr1G018370::chr6H:46437811-46441437	2053.29630322912	-0.681501513812087	0.149347786157112	-4.56318457305526	5.03834834928575e-06	0.000155559930091163
gene:HORVU2Hr1G016740::chr2H:38598091-38603699	950.394755203711	-0.680033320636506	0.158268060370763	-4.29671861172395	1.73345009809649e-05	0.000431842674912048
gene:HORVU6Hr1G071780::chr6H:498862843-498866618	757.939744263663	-0.679987987544313	0.150228741212409	-4.52635083045046	6.00109239645531e-06	0.000179594906792301
gene:HORVU2Hr1G096970::chr2H:677193728-677199149	617.335270600445	-0.67916666224522	0.200095164811407	-3.39421826052291	0.000688248163695318	0.00837933172545324
gene:HORVU5Hr1G088680::chr5H:582289387-582293361	1002.33687340184	-0.67878909651891	0.158389764643765	-4.28556162101495	1.82278113191707e-05	0.000447916339893067
gene:HORVU1Hr1G065390::chr1H:467086027-467088538	77.8868890807194	-0.678143135201563	0.229020851286368	-2.9610541197125	0.00306588060332419	0.0266338491261937
gene:HORVU0Hr1G001460::chrUn:7518567-7521884	80.3465488363749	-0.676894645686098	0.2464837345167	-2.74620411368457	0.0060289241429453	0.0442149142063369
gene:HORVU1Hr1G003300::chr1H:7217839-7229089	303.353035131006	-0.675830187255033	0.16271292358843	-4.15351265499042	3.27410096874514e-05	0.000720850753600369
gene:HORVU1Hr1G067910::chr1H:479597261-479600043	186.298980005101	-0.675677914766882	0.248072812474104	-2.72370804373177	0.00645535439045425	0.0464035150132277
gene:HORVU6Hr1G071520::chr6H:497057506-497063327	146.860657276572	-0.675111618728284	0.204370790653684	-3.30336647702407	0.000955314514211523	0.0108049720149605
gene:HORVU3Hr1G071870::chr3H:543136921-543138097	264.581574112858	-0.674429738406631	0.162471521546267	-4.15106433415517	3.30932718952985e-05	0.000726324775438985
gene:HORVU5Hr1G094410::chr5H:595413473-595419236	207.023098921859	-0.673825555594057	0.186169003342583	-3.61942935448873	0.000295253401217503	0.00424623667168208
gene:HORVU2Hr1G109080::chr2H:715794808-715797738	352.01305904503	-0.673766474460827	0.226769544170773	-2.97115063190952	0.00296686222900672	0.0259283711018192
gene:HORVU1Hr1G020360::chr1H:79212695-79218619	167.448048048488	-0.673407937016206	0.163148798809103	-4.12756907762555	3.66618318567396e-05	0.000791428826098364
gene:HORVU4Hr1G072520::chr4H:585626695-585756819	78.1820706628451	-0.673246781069718	0.228648457817524	-2.94446237466868	0.00323516279773803	0.0276964710851953
gene:HORVU4Hr1G059130::chr4H:494330320-494334904	2874.8595712421	-0.672682171728509	0.188659384116317	-3.56559083916956	0.000363037386579533	0.00505176974865736
gene:HORVU3Hr1G086480::chr3H:617337780-617341933	134.588386982192	-0.670398521600467	0.177975123901372	-3.76681025361713	0.000165346571106953	0.00268876798460542
gene:HORVU5Hr1G054350::chr5H:427539891-427546049	169.244187416997	-0.670165553346875	0.145736478177528	-4.59847501275909	4.25594747084497e-06	0.000136203274767102
gene:HORVU2Hr1G123370::chr2H:755194888-755197487	150.700967045548	-0.668571105750103	0.211474367825714	-3.16147584515351	0.00156971836792367	0.0159136443606379
gene:HORVU3Hr1G067110::chr3H:509822494-509829410	758.856023572921	-0.665680477679497	0.204341420230302	-3.25768743766802	0.00112324050770696	0.0122242520264216
gene:HORVU7Hr1G044240::chr7H:137095412-137098411	108.619814881742	-0.665593920017325	0.214440438085953	-3.10386383257871	0.00191011219315757	0.0184313992534792
gene:HORVU5Hr1G060730::chr5H:475425693-475430886	387.893497808733	-0.664458674880168	0.161510574451055	-4.11402582857837	3.88817901960438e-05	0.000826621355573324
gene:HORVU7Hr1G029330::chr7H:55007476-55011109	95.2035588456555	-0.663540506302067	0.201271509556826	-3.29674332826885	0.00097812845353056	0.0109874516708784
gene:HORVU1Hr1G007310::chr1H:14369285-14375231	350.901623468918	-0.659881936446576	0.208969725892216	-3.1577872518574	0.00158971529114201	0.0160853482731241
gene:HORVU4Hr1G000930::chr4H:1339812-1341744	404.900449179038	-0.6594389753625	0.162260075352435	-4.06408646076476	4.82209501005532e-05	0.000986434474393321
gene:HORVU5Hr1G094510::chr5H:596127887-596132673	128.037801492359	-0.659394487766344	0.238555764446456	-2.76411047662755	0.00570782104857904	0.0423923155660271
gene:HORVU2Hr1G046860::chr2H:254969880-254972271	269.265880227553	-0.659009099955059	0.23508999787655	-2.80322049388556	0.00505950660025053	0.0387122218984235
gene:HORVU3Hr1G066420::chr3H:505434343-505441078	295.897010391567	-0.658765121242926	0.238746953295837	-2.75926084981966	0.00579322721669052	0.0428950711255795
gene:HORVU7Hr1G085180::chr7H:514973656-514977085	188.009222287381	-0.658721118201237	0.177946544287868	-3.70179213559556	0.000214081976806324	0.00333428714394798
gene:HORVU4Hr1G011160::chr4H:33953500-33958081	216.486630744035	-0.657743125452649	0.190860837987826	-3.44619217010146	0.000568545898120096	0.00720569382391389
gene:HORVU4Hr1G013170::chr4H:44968301-44972078	249.315687597563	-0.657441939209495	0.199874808275925	-3.28926864210874	0.0010044809961962	0.0111806338941351
gene:HORVU4Hr1G066510::chr4H:554018345-554022849	244.096828282323	-0.657436201868165	0.226867008467731	-2.89789249793752	0.00375679335907377	0.0310374605767721
gene:HORVU4Hr1G054910::chr4H:460072406-460075545	232.782504317582	-0.655808458171859	0.235117980997838	-2.78927394403701	0.00528263604871833	0.0400398849104801
gene:HORVU7Hr1G118260::chr7H:647058348-647063049	82.126748531486	-0.655669847391663	0.215039456504085	-3.04906763647446	0.00229552793812846	0.0213944017850571
gene:HORVU1Hr1G028280::chr1H:152295626-152301653	109.16052039178	-0.654689115593586	0.16913368337024	-3.87083815918824	0.000108461785116227	0.00188628411402299
gene:HORVU4Hr1G053180::chr4H:442886503-442889578	181.521608383708	-0.654366404492704	0.16563276884177	-3.95070618615223	7.79209356779862e-05	0.0014333907205296
gene:HORVU1Hr1G050130::chr1H:372283943-372292526	348.742577462185	-0.653851737964381	0.164168374408394	-3.98281179502835	6.81046876820498e-05	0.00128543012854828
gene:HORVU7Hr1G031020::chr7H:62553493-62559649	107.878636961312	-0.652522436532884	0.200269870382485	-3.25821570307438	0.00112115151213539	0.0122078361958357
gene:HORVU0Hr1G000030::chrUn:147440-157466	196.361841695695	-0.646304329787183	0.147346233641176	-4.38629691316774	1.15296712948528e-05	0.000311197520726026
gene:HORVU1Hr1G020140::chr1H:77984087-77986299	336.636146784864	-0.644540810138939	0.228482196345558	-2.82096732457934	0.00478790794486987	0.0371135023081036
gene:HORVU4Hr1G005360::chr4H:11932936-11937799	164.61653475356	-0.6430687486622	0.224955083131413	-2.85865400199264	0.00425442544156883	0.0338710902440084
gene:HORVU1Hr1G004230::chr1H:8929486-8937936	84.4336427705773	-0.642895208401757	0.221595458946758	-2.90121111442191	0.00371723349931913	0.0308074700657013
gene:HORVU6Hr1G080770::chr6H:542829473-542831087	107.647851799168	-0.642816323806483	0.231093041233054	-2.78163427326318	0.00540859518973028	0.0406727905791377
gene:HORVU5Hr1G076030::chr5H:548944997-549006264	161.935951996302	-0.642132316955658	0.22657696477743	-2.83405825294921	0.00459609530027122	0.0359380809905179
gene:HORVU3Hr1G116060::chr3H:695248049-695248854	333.42526888273	-0.641526146857141	0.16886354526915	-3.7990801734893	0.000145234108553634	0.00241972453759803
gene:HORVU5Hr1G114250::chr5H:643433503-643436058	162.241999732056	-0.641208925327314	0.157202537907592	-4.07887133288037	4.52548734222807e-05	0.000936811612884504
gene:HORVU3Hr1G031850::chr3H:160127576-160130104	1112.01584467662	-0.64035331803437	0.211323350533181	-3.03020615761922	0.00244386861632063	0.0223509271538745
gene:HORVU2Hr1G115700::chr2H:735297581-735304406	126.663400193686	-0.64017735741211	0.199354912496428	-3.21124445540603	0.00132161456664939	0.0138252200987956
gene:HORVU5Hr1G023140::chr5H:120874423-120882275	405.338130340027	-0.639693539778182	0.112713810200813	-5.67537854179975	1.38382300767904e-08	8.98032795045048e-07
gene:HORVU2Hr1G038860::chr2H:184796520-184805986	171.916445634779	-0.638263329341908	0.190896007694397	-3.34351324079913	0.000827247462154431	0.00966854093344028
gene:HORVU3Hr1G018860::chr3H:49676812-49684566	60.4947950346481	-0.637732985105002	0.230454106149774	-2.76728844523402	0.00565247185110546	0.0421426934359136
gene:HORVU5Hr1G103790::chr5H:617185782-617189531	127.134231572419	-0.635386220161265	0.207027184976464	-3.06909558874357	0.00214707880469835	0.020253243134853
gene:HORVU4Hr1G023430::chr4H:126856767-126860156	385.914458748565	-0.634803305593593	0.227723243430304	-2.78760874837038	0.00530986293013273	0.040168725060559
gene:HORVU2Hr1G091720::chr2H:649447326-649449948	128.255074298663	-0.634334113657456	0.229315543520538	-2.766206354436	0.00567126352243924	0.0422252077984446
gene:HORVU5Hr1G094210::chr5H:594546409-594553445	514.37540488298	-0.633081186219423	0.223231151240935	-2.83598943382294	0.00456839573853967	0.0357613882347487
gene:HORVU5Hr1G067570::chr5H:513285274-513290639	292.919875022118	-0.631579830885202	0.137711217261917	-4.58626278557963	4.5125057033915e-06	0.000142248792982773
gene:HORVU1Hr1G051200::chr1H:379645199-379651249	86.8441541085133	-0.630074837992365	0.211688691175768	-2.9764218130538	0.00291633435109726	0.0256135530769302
gene:HORVU4Hr1G021270::chr4H:107800657-107803772	329.207006406108	-0.629664307941135	0.160931117069781	-3.91263243185037	9.12954420207121e-05	0.00163368337355531
gene:HORVU3Hr1G030760::chr3H:149813139-149816033	280.791001984054	-0.629492020976593	0.222339742403006	-2.83121683138229	0.0046371273328964	0.0361955530490736
gene:HORVU5Hr1G040870::chr5H:305525515-305528748	76.4532643592624	-0.629271288460759	0.207721394220137	-3.02940046605829	0.00245039632378948	0.0223814218523013
gene:HORVU2Hr1G122850::chr2H:753923724-753928860	103.021329256152	-0.629059017816502	0.216306053786951	-2.90818960821174	0.00363527852300774	0.0302954285472694
gene:HORVU7Hr1G048970::chr7H:169149518-169151165	2095.19261892418	-0.627396225356488	0.149207385276193	-4.20486039746047	2.6124335432871e-05	0.000599661874248412
gene:HORVU1Hr1G091870::chr1H:549125553-549132020	450.087701665854	-0.62648220686816	0.161730826836183	-3.87361036311725	0.000107234811467658	0.00186958469810861
gene:HORVU6Hr1G083770::chr6H:552728219-552730216	80.2294802426447	-0.626334441662378	0.190058664144173	-3.29547955355121	0.000982538531270723	0.0110121829203082
gene:HORVU7Hr1G038650::chr7H:98731654-98744216	781.815255495739	-0.626246638284884	0.102490990464387	-6.11026037944755	9.94687203389456e-10	8.5714316141257e-08
gene:HORVU5Hr1G070260::chr5H:527679960-527683202	140.282875055803	-0.626130332459097	0.229054283125549	-2.73354562034495	0.00626564428923263	0.0453967735442471
gene:HORVU5Hr1G118690::chr5H:653584308-653656131	108.285718708887	-0.626018113578739	0.207740305007408	-3.01346488134027	0.00258282932643556	0.0233677148957118
gene:HORVU6Hr1G071840::chr6H:499046816-499054703	124.801804809813	-0.625744504731379	0.185203631518192	-3.37868377418892	0.000728337341187	0.00878097530722355
gene:HORVU4Hr1G079830::chr4H:613443862-613452358	502.343952319245	-0.62196499605386	0.146651087632438	-4.24112092242189	2.22406267573105e-05	0.000528994816967432
gene:HORVU4Hr1G066860::chr4H:555801831-555805679	3696.66345642208	-0.620945415785118	0.170041606747753	-3.65172634898855	0.00026048336953395	0.00388709959391117
gene:HORVU3Hr1G113090::chr3H:687547236-687550255	73.5335398883	-0.618232061988165	0.217718769445655	-2.83959009855823	0.00451715367055821	0.035413002638761
gene:HORVU5Hr1G112680::chr5H:640002498-640006658	101.865179856196	-0.616162222641009	0.206320031719713	-2.98643916203962	0.00282246991961758	0.0249582246726037
gene:HORVU1Hr1G022750::chr1H:98022461-98027097	1116.85173674098	-0.612187449667422	0.109093323425762	-5.61159409616867	2.00471229263305e-08	1.24707339245274e-06
gene:HORVU1Hr1G080640::chr1H:525926234-525929316	262.505964705602	-0.611987202850964	0.21822159963518	-2.80443001001769	0.00504056298948964	0.0385953668670827
gene:HORVU5Hr1G073550::chr5H:540120301-540124381	180.707113900986	-0.610718755740216	0.211106567950074	-2.89294057342948	0.00381653500137217	0.0312973732210809
gene:HORVU1Hr1G002840::chr1H:5769012-5772735	760.091756952679	-0.610583738196381	0.189128125161725	-3.22841321286439	0.0012447902344816	0.013192015862001
gene:HORVU4Hr1G068760::chr4H:566991986-567000389	199.067646377674	-0.610315967959527	0.17281062104093	-3.53170403695831	0.000412891191174987	0.00560093560364211
gene:HORVU4Hr1G065920::chr4H:549090370-549094817	214.075095266081	-0.61020706627176	0.141313710578306	-4.31810235379551	1.57376449326552e-05	0.000397964359684833
gene:HORVU7Hr1G074550::chr7H:427029428-427032480	72.6588678946397	-0.607888162053717	0.217185456088553	-2.79893586339347	0.00512713202357414	0.0391584009907991
gene:HORVU1Hr1G058820::chr1H:428360537-428371272	668.508182905111	-0.607798961800269	0.114496786095495	-5.3084368786853	1.1056936291346e-07	5.72835270453764e-06
gene:HORVU4Hr1G059120::chr4H:494208998-494213059	342.49481542371	-0.606782618005625	0.205932452457186	-2.94651285295491	0.0032137906256567	0.0275696294145483
gene:HORVU2Hr1G087380::chr2H:627474696-627479072	106.640818609607	-0.605021226612633	0.200280812626632	-3.02086464838011	0.00252054004748608	0.0229225238055546
gene:HORVU6Hr1G055820::chr6H:355516467-355521532	110.26942299921	-0.603253296347085	0.208127663261717	-2.89847724657583	0.00374979515851702	0.0310040082591344
gene:HORVU1Hr1G051440::chr1H:381206283-381213491	359.30331079016	-0.599346069760001	0.175341628816044	-3.41816186952839	0.000630455998047848	0.00782524664401065
gene:HORVU1Hr1G055210::chr1H:404914154-404917858	97.6621269146995	-0.599102696434574	0.209780091655548	-2.85586059051914	0.0042920354511144	0.0341188421153616
gene:HORVU7Hr1G007580::chr7H:9879962-9884227	98.6050985416923	-0.598486096911683	0.208844090224239	-2.86570760163278	0.00416078358786901	0.0333313647351073
gene:HORVU5Hr1G061360::chr5H:480242587-480249427	234.406807248013	-0.59835569050761	0.214820437142742	-2.78537600270323	0.00534656846365838	0.0404086802720636
gene:HORVU3Hr1G087700::chr3H:622000293-622003927	297.049673843952	-0.597949649621548	0.171396195110013	-3.48869850487491	0.000485378277183885	0.0063467435672067
gene:HORVU1Hr1G048000::chr1H:355335032-355345795	142.898537103565	-0.597390710345887	0.184907036897303	-3.23076244349574	0.00123460503934684	0.0131024538456385
gene:HORVU4Hr1G054600::chr4H:456590302-456596428	162.516984315282	-0.59666524421114	0.20154960285712	-2.96038908414084	0.00307250734425162	0.0266732202395684
gene:HORVU1Hr1G064870::chr1H:463490387-463493377	697.589947689202	-0.595762816262921	0.143555770091606	-4.15004437566495	3.32410824048831e-05	0.000728808132059511
gene:HORVU4Hr1G043910::chr4H:350262816-350266616	2198.16221973433	-0.594475676365162	0.117323181495967	-5.06699246291404	4.04150278869528e-07	1.77034661739806e-05
gene:HORVU7Hr1G047470::chr7H:159411849-159420275	358.182519890236	-0.593218100330214	0.168475984376123	-3.52108404368099	0.000429786374713237	0.00576319407826564
gene:HORVU4Hr1G059060::chr4H:493802120-493805262	306.54018620906	-0.59039504267163	0.146672442359863	-4.02526223176326	5.69118591210584e-05	0.00112889504705601
gene:HORVU2Hr1G119260::chr2H:744819647-744825351	124.050447455495	-0.59012845264076	0.215374555548358	-2.74001007750546	0.00614373005830348	0.0448068221317686
gene:HORVU6Hr1G091720::chr6H:576446978-576451301	89.7032467252389	-0.58800588909196	0.200290660197755	-2.93576289833683	0.00332728534312315	0.028335156591538
gene:HORVU3Hr1G035380::chr3H:196463322-196467017	192.452510419531	-0.585782023189329	0.166852816031561	-3.51077097241515	0.000446809169257118	0.00594972108473728
gene:HORVU7Hr1G055370::chr7H:226851777-226867129	142.14148542952	-0.583972944428343	0.15283965602585	-3.82082084985571	0.000133008245540582	0.00225534787962603
gene:HORVU4Hr1G056140::chr4H:471124884-471128131	312.650844763405	-0.583188811523811	0.155719449412933	-3.74512505484993	0.000180303941186371	0.00289173963950011
gene:HORVU6Hr1G054280::chr6H:342867862-342871364	234.761196119012	-0.582711679697657	0.158664233827092	-3.67260891533174	0.000240086769745783	0.00365272389339713
gene:ENSRNA049489212::chr7H:4037658-4037962	49600.7046646327	-0.581958122814514	0.145356758267439	-4.00365369832877	6.2371646859554e-05	0.0012053550063134
gene:HORVU5Hr1G093400::chr5H:591687483-591697339	397.862714461655	-0.581937537676635	0.14227162209	-4.09032756587612	4.30764371563376e-05	0.000900323228279478
gene:HORVU6Hr1G018420::chr6H:46538710-46542489	602.270433094622	-0.580787882617977	0.172933944530899	-3.35843772137056	0.00078384381922131	0.00931661963987974
gene:HORVU4Hr1G006070::chr4H:14589100-14591967	93.568745737086	-0.579194305791305	0.211686819084918	-2.73609055252024	0.00621739144898161	0.0451560872560578
gene:HORVU4Hr1G038090::chr4H:286339637-286343983	341.991529085697	-0.576602734036892	0.140100475059348	-4.11563725099887	3.86111151772614e-05	0.000822530200321274
gene:HORVU5Hr1G120550::chr5H:657808245-657815734	130.068932316923	-0.573324302062764	0.195181207251935	-2.93739499890854	0.00330982233728658	0.0281978624245493
gene:ENSRNA049460237::chr6H:504782457-504782761	35305.8691588138	-0.571416251868676	0.162817465907004	-3.50955131677981	0.000448863433087374	0.00597329274942729
gene:HORVU7Hr1G022570::chr7H:33041571-33044300	1090.05849651402	-0.571166308565237	0.139225961169829	-4.1024411235238	4.08813903974805e-05	0.00086043254704447
gene:HORVU3Hr1G064290::chr3H:490788415-490795983	164.745055933776	-0.571027577986213	0.171231619105364	-3.33482554781452	0.000853529274364306	0.00993704680109851
gene:HORVU6Hr1G019520::chr6H:53164600-53166974	176.950198012873	-0.570589506803562	0.183563494207028	-3.10840403898629	0.00188100719795672	0.0182347951427257
gene:HORVU4Hr1G059660::chr4H:499197753-499200353	471.831215359702	-0.570567170887821	0.145853432366718	-3.91192145175746	9.1564695496113e-05	0.00163710823767115
gene:HORVU5Hr1G094670::chr5H:596683266-596687429	103.943217557558	-0.56729526603566	0.190460507353324	-2.97854538937707	0.00289620130159072	0.025489965913456
gene:HORVU5Hr1G042310::chr5H:323065312-323070724	572.450757649551	-0.566008992080427	0.201288307126247	-2.8119318015101	0.00492449432738912	0.037844450923861
gene:HORVU5Hr1G001090::chr5H:3761221-3766664	656.63712095597	-0.562746776110579	0.195441583538217	-2.87936050211412	0.00398482541824288	0.032349397391496
gene:HORVU2Hr1G042490::chr2H:213581123-213588260	222.129096045686	-0.560385106096726	0.182352828633912	-3.07308151068906	0.00211860610544559	0.0200656810689635
gene:HORVU5Hr1G107170::chr5H:626087107-626089319	228.815603122688	-0.560106081053884	0.141748923847292	-3.95139564979903	7.76967495782435e-05	0.00143051826325057
gene:HORVU5Hr1G056820::chr5H:445001417-445012127	524.513250842686	-0.559036166240501	0.182362301909049	-3.06552483922533	0.00217288328009348	0.0204599390269796
gene:HORVU2Hr1G108010::chr2H:713159345-713164457	265.0421364894	-0.558141040212503	0.185683814914373	-3.00586801531349	0.0026482391880045	0.0237775360046665
gene:HORVU3Hr1G074220::chr3H:557381814-557384921	169.951217029553	-0.556427803340679	0.186777414215248	-2.97909576314958	0.00289100409977841	0.0254655434444662
gene:HORVU1Hr1G076530::chr1H:514601031-514605349	212.604069320455	-0.555672919761864	0.184613973449904	-3.00991798929375	0.00261318238370092	0.0235612233274852
gene:HORVU3Hr1G087090::chr3H:619839618-619841398	94.5609645314556	-0.555552603449456	0.203386428285897	-2.73151265859551	0.00630443190484962	0.0455710443060946
gene:HORVU2Hr1G026870::chr2H:86580718-86708702	130.657690170148	-0.555009467072701	0.201246070586086	-2.75786486392681	0.00581802441918717	0.0429830574272064
gene:HORVU3Hr1G117760::chr3H:699261815-699265712	120.477399269925	-0.553551245173683	0.204930455672322	-2.70116632180234	0.00690967751878309	0.0487447966588012
gene:HORVU4Hr1G078410::chr4H:607441611-607443946	142.651699968412	-0.553348395180873	0.169980423318048	-3.25536543785111	0.00113246546599815	0.0122936513683302
gene:HORVU2Hr1G105890::chr2H:707703748-707706442	178.924663828971	-0.552657074308711	0.164570153829597	-3.35818531761814	0.000784559952161343	0.00931986302494033
gene:HORVU5Hr1G050510::chr5H:392948142-393007762	460.740323337869	-0.552038707229908	0.108225550930394	-5.10081678941933	3.38190812152758e-07	1.51293617368593e-05
gene:HORVU5Hr1G000010::chr5H:248987-254173	308.815276555913	-0.551380705172963	0.150546575636997	-3.66252571896734	0.000249740669668821	0.00376959606637232
gene:HORVU2Hr1G037470::chr2H:172216160-172227446	463.306079506493	-0.549541058881974	0.165941148323084	-3.3116623841365	0.000927433977155665	0.0105715054244129
gene:HORVU6Hr1G075170::chr6H:518399319-518402942	114.906161870478	-0.549377395126441	0.20392772132236	-2.69398094365998	0.00706042013060334	0.0495667424594544
gene:HORVU2Hr1G100660::chr2H:691866098-691871466	236.157461071869	-0.548856195229792	0.17056097011513	-3.21794719424562	0.00129111585429957	0.0135938918139724
gene:HORVU4Hr1G009340::chr4H:26499858-26504881	134.705609177793	-0.547319187678139	0.184690572297952	-2.96343869028234	0.00304222658662055	0.0264649798139361
gene:HORVU2Hr1G079960::chr2H:578958300-578962410	456.059776087693	-0.546675709820303	0.156087932104382	-3.50235730879387	0.000461160723043864	0.00611758067048599
gene:HORVU5Hr1G094500::chr5H:596120538-596121846	213.937975123537	-0.544908527622265	0.174865025405145	-3.11616646244591	0.00183218814918553	0.0179346312964502
gene:HORVU1Hr1G008250::chr1H:17906765-17913663	225.821928553737	-0.542938248627097	0.161166899068648	-3.36879503027377	0.00075497549607514	0.00904507964699481
gene:HORVU1Hr1G051290::chr1H:380291316-380295653	174.433132854567	-0.541707772756856	0.169029656531706	-3.20480904873191	0.00135152110632872	0.0140957751893193
gene:HORVU3Hr1G077960::chr3H:575421995-575424645	664.8017615328	-0.538091296649459	0.162394421835607	-3.31348386580773	0.000921414230191849	0.0105177283409413
gene:HORVU3Hr1G074770::chr3H:559794502-559801078	169.290137809028	-0.537926119266912	0.173603492253767	-3.0985904274356	0.00194443621130626	0.0186939715495773
gene:HORVU6Hr1G079720::chr6H:538632706-538636682	92.957005670665	-0.536545139199904	0.192883800276819	-2.78170141001927	0.00540747656240314	0.0406727905791377
gene:HORVU6Hr1G050720::chr6H:307967893-307971510	217.1898055941	-0.535439842147498	0.160736170092619	-3.33117208055266	0.00086481124183755	0.010035055833817
gene:HORVU3Hr1G035000::chr3H:193000779-193008200	190.208068904127	-0.534667484356014	0.157411014226804	-3.39663324693179	0.000682203341200377	0.00831536663888646
gene:ENSRNA049488567::chr7H:91340873-91341034	954.831531195209	-0.530541595960783	0.186378225531267	-2.84658572345823	0.00441908294829779	0.0348390094004159
gene:HORVU2Hr1G092840::chr2H:655507500-655511651	237.59635809168	-0.530354404501153	0.188195194311981	-2.81810811609757	0.00483075404579508	0.03728371649276
gene:HORVU1Hr1G089710::chr1H:544690026-544692914	189.471560578128	-0.529841389176524	0.159937965863283	-3.31279309647742	0.000923692853608562	0.0105380173304252
gene:HORVU2Hr1G029600::chr2H:106654188-106657130	196.075175534294	-0.528356558829297	0.168163085566676	-3.14192949688597	0.00167838445350145	0.0168036721721114
gene:HORVU3Hr1G096140::chr3H:652156267-652159557	424.69715633908	-0.527159183583563	0.1311506879698	-4.01949232401244	5.8323681860374e-05	0.00114823383407886
gene:HORVU5Hr1G103680::chr5H:616902720-616905527	793.479262653948	-0.525596821046544	0.0978705456329827	-5.37032687053312	7.85940546427342e-08	4.23722716132853e-06
gene:HORVU7Hr1G115450::chr7H:641609756-641612230	129.256318621507	-0.524112647310613	0.166061170363064	-3.15614207803506	0.00159870965403052	0.0161530366101133
gene:HORVU6Hr1G082880::chr6H:549919841-549923137	396.804892733831	-0.524025281130659	0.156293348204743	-3.35283162815214	0.000799893507186185	0.00945925808891829
gene:HORVU3Hr1G081880::chr3H:596525477-596528633	138.452221331847	-0.523856435610633	0.16050299526444	-3.26384211551656	0.00109912396356123	0.0120365523217909
gene:HORVU6Hr1G073280::chr6H:507756328-507760902	195.526995517443	-0.523000113433047	0.189185474035801	-2.76448345782655	0.00570129978708507	0.0423738173641749
gene:HORVU5Hr1G013290::chr5H:42734271-42760861	298.788533470416	-0.5221110879348	0.153093205330152	-3.41041319769121	0.000648645277144075	0.00801317015113474
gene:HORVU7Hr1G001070::chr7H:2422918-2427716	381.507643803328	-0.521851808985189	0.166384766476968	-3.13641579115012	0.00171026543504672	0.0170440577134957
gene:HORVU3Hr1G025920::chr3H:103084770-103088991	1115.21888090654	-0.52151129820233	0.17050091074223	-3.05870095316248	0.00222298932199278	0.0208105848104275
gene:HORVU2Hr1G087580::chr2H:628891954-628974621	147.528021104134	-0.518852534331097	0.171895333569681	-3.01842128902685	0.00254095398732766	0.0230583075259177
gene:HORVU2Hr1G025780::chr2H:80975097-80977949	153.25997411837	-0.51563138327545	0.190797049143697	-2.70251235849621	0.00688176260795878	0.0486442949002984
gene:HORVU4Hr1G007880::chr4H:21422379-21429142	378.130435071518	-0.51522505678768	0.118362893152245	-4.3529271975886	1.34331769003779e-05	0.000348632798325546
gene:HORVU1Hr1G083480::chr1H:531910609-531910838	10528.3326758675	-0.514503253649747	0.183408422171573	-2.80523242912173	0.00502803079626527	0.038521773919583
gene:HORVU3Hr1G079700::chr3H:584539967-584543097	661.502310648724	-0.514236310176176	0.119823027215433	-4.29163176833796	1.77364901740123e-05	0.000439254938043324
gene:HORVU5Hr1G083170::chr5H:569491225-569493946	127.36181002169	-0.510675294425384	0.187482497931172	-2.72385582686691	0.00645246668988785	0.0463986199116217
gene:HORVU1Hr1G079890::chr1H:523958187-523971300	337.679468815712	-0.510446080203274	0.103337951305763	-4.93958002605388	7.82910082816542e-07	3.11770215933724e-05
gene:HORVU5Hr1G067740::chr5H:514305841-514309764	141.802258961997	-0.506942957913003	0.18038439365003	-2.81034821059155	0.00494879260778679	0.0380162395296537
gene:HORVU7Hr1G087590::chr7H:527964194-527993840	134.501337909211	-0.506705706801464	0.1875917790825	-2.70110827499868	0.00691088361266462	0.0487447966588012
gene:HORVU3Hr1G087000::chr3H:619640038-619644771	264.731483549779	-0.504538284222442	0.129130005764919	-3.90721181520703	9.3367299407259e-05	0.0016663382800381
gene:HORVU1Hr1G075530::chr1H:511076584-511081068	206.269813019226	-0.502660860452521	0.171918577762853	-2.92383096110705	0.00345752450856946	0.0291257653514349
gene:HORVU7Hr1G074520::chr7H:426422651-426428478	91.6062403696132	-0.501420747284553	0.169748613506095	-2.95390187246831	0.00313783762332715	0.0270570839854747
gene:ENSRNA049484426::chr4H:607744728-607745033	28838.3783033981	-0.500885885937369	0.152860775176926	-3.27674568807876	0.00105010906533553	0.0116025187639227
gene:HORVU2Hr1G029870::chr2H:108478219-108481831	1552.62222709601	-0.500231142960993	0.177649142200857	-2.81583764922103	0.00486502447253187	0.0374558786376621
gene:HORVU7Hr1G105510::chr7H:617110916-617114740	125.666646696975	-0.498681674244179	0.173487958465815	-2.87444545808314	0.00404737669098411	0.0326905781353788
gene:HORVU3Hr1G022030::chr3H:76091633-76095793	118.646661854272	-0.496983276884375	0.171867697184656	-2.89166192964354	0.00383210056691104	0.0313836275865647
gene:HORVU7Hr1G006160::chr7H:8000359-8003900	2535.8347679391	-0.496359166198273	0.115439314045876	-4.29974112632911	1.70997735461315e-05	0.00042650040163815
gene:HORVU3Hr1G010300::chr3H:22601279-22607841	370.497812114313	-0.495490285510339	0.13017597232441	-3.80631138498841	0.000141054773121524	0.00236320132243281
gene:HORVU3Hr1G023220::chr3H:86137492-86150517	253.495417575645	-0.494111809639628	0.16029161352403	-3.08258054664572	0.00205214185762113	0.019524133347666
gene:HORVU7Hr1G119590::chr7H:649994416-649998004	445.844554911315	-0.491638914313484	0.112495979937049	-4.37027984989862	1.24087403434738e-05	0.000330679562055614
gene:HORVU7Hr1G003710::chr7H:6621146-6626104	188.19517081592	-0.483315015647318	0.16577874572462	-2.91542207980126	0.00355207793466957	0.0297735984016079
gene:HORVU3Hr1G045150::chr3H:294750253-294757389	352.989235649947	-0.480679068318776	0.153650911258275	-3.12838410382606	0.00175770314727735	0.0173590729801097
gene:HORVU4Hr1G080140::chr4H:614363809-614366831	537.232368146835	-0.475120487366968	0.135946341922745	-3.49491189426021	0.000474218268928811	0.00623962035200073
gene:HORVU6Hr1G071790::chr6H:498903870-498907731	216.892598168751	-0.473073385566746	0.147120026762371	-3.21556076339529	0.00130189929777153	0.013686867317472
gene:HORVU6Hr1G085870::chr6H:560155443-560160792	467.185754973932	-0.466471089956901	0.155018481910989	-3.00913209964699	0.00261995173147795	0.0236020158980528
gene:HORVU6Hr1G088370::chr6H:566364688-566370699	278.637907457511	-0.466445132135258	0.131461649425587	-3.54814604999526	0.000387953035629657	0.0053071571419318
gene:HORVU7Hr1G119370::chr7H:649466989-649472294	257.271784816301	-0.466420630273688	0.162775116132495	-2.86542956537676	0.00416443903543836	0.0333313647351073
gene:HORVU4Hr1G063270::chr4H:530353256-530362694	584.518266492759	-0.461944112004619	0.158900788702915	-2.90712283919674	0.00364769924728594	0.0303868955520738
gene:HORVU5Hr1G020280::chr5H:92317961-92323849	124.9107841294	-0.461214265517306	0.166724441958857	-2.76632664112393	0.00566917183434077	0.0422245862518062
gene:HORVU4Hr1G011280::chr4H:34775086-34779459	619.830838302267	-0.459572377460552	0.158299603529062	-2.90318084957288	0.00369393256498562	0.030671152227174
gene:HORVU4Hr1G046380::chr4H:369398121-369400601	283.84604545509	-0.459054082515209	0.154346832500589	-2.9741723563615	0.00293780008577217	0.0257415823691439
gene:HORVU4Hr1G047340::chr4H:379742584-379751194	250.804939815604	-0.458166539350464	0.142975099482833	-3.20451981504286	0.00135287977675408	0.0141029500178638
gene:HORVU2Hr1G025890::chr2H:81697826-81713247	243.427361803746	-0.458099982908365	0.152089051135722	-3.01205102857512	0.00259488973160705	0.0234465627403394
gene:HORVU4Hr1G043300::chr4H:344119394-344123179	210.544096074386	-0.457992669672115	0.125609969713384	-3.64614903352942	0.000266199627046286	0.00393799432448325
gene:HORVU4Hr1G024470::chr4H:139539906-139548051	179.512501518982	-0.457859204620764	0.14254920273683	-3.21193802441709	0.00131842813898788	0.0138054133716928
gene:HORVU1Hr1G023520::chr1H:103980540-104042136	216.891416925713	-0.457310131156094	0.157734681362638	-2.89923640892089	0.00374072727380256	0.0309412004952685
gene:HORVU7Hr1G095720::chr7H:583583513-583586359	476.379569871924	-0.457166802997527	0.142707516001604	-3.20352295244484	0.00135757218277752	0.0141448526833896
gene:HORVU5Hr1G125620::chr5H:669458540-669551743	402.801193575948	-0.456837455009335	0.156867483003129	-2.91225081363882	0.003588343786387	0.0299791068617302
gene:HORVU3Hr1G108110::chr3H:674275614-674286058	383.469979448875	-0.456736747866183	0.158029920823131	-2.89019158832187	0.00385007104655203	0.0314613482219607
gene:HORVU3Hr1G040270::chr3H:241775084-241780591	800.937906609694	-0.455126027037729	0.11264494754357	-4.04035899490023	5.33694448009462e-05	0.00106871042512828
gene:HORVU2Hr1G111070::chr2H:721943806-721946820	433.689360020326	-0.454446072136655	0.104405599936383	-4.35269825003219	1.34472177038913e-05	0.000348632798325546
gene:HORVU3Hr1G026420::chr3H:107033859-107036816	104.592086512077	-0.453827265790343	0.16418542257771	-2.76411424756995	0.00570775508318349	0.0423923155660271
gene:HORVU4Hr1G064080::chr4H:537010994-537014533	151.452935734734	-0.450668709076283	0.136892542122358	-3.29213485328854	0.00099429922172237	0.0110907880296735
gene:HORVU4Hr1G051120::chr4H:418187717-418193176	188.847728059701	-0.44595158258665	0.161351044724761	-2.76385928177516	0.00571221676884573	0.0424099822675672
gene:HORVU2Hr1G063350::chr2H:427411553-427413683	1065.76932079697	-0.441575023662685	0.138985950446122	-3.17711986172201	0.00148745546707984	0.015241344371745
gene:HORVU5Hr1G047790::chr5H:371034833-371041066	906.792449720953	-0.44128855332949	0.159375808721653	-2.76885530413335	0.00562536120298321	0.0420024306299449
gene:HORVU2Hr1G075790::chr2H:545237733-545241274	405.536389588552	-0.440582164465723	0.146456415784869	-3.00828176153714	0.00262729426712918	0.0236276686315903
gene:HORVU1Hr1G073230::chr1H:502081020-502084964	463.176916174384	-0.437164992672863	0.11396347674865	-3.83600961593198	0.000125049513632659	0.00214286151070928
gene:HORVU1Hr1G003170::chr1H:6686730-6690773	130.168724433541	-0.430839988947584	0.156552545102179	-2.75204717155114	0.00592239893807193	0.0435857053104307
gene:HORVU5Hr1G023010::chr5H:119819089-119821981	377.277020884586	-0.429361769908418	0.151655160186652	-2.83117151688063	0.00463778438334868	0.0361955530490736
gene:HORVU1Hr1G061500::chr1H:444681068-444684200	689.45165741443	-0.425763016603799	0.128077225866199	-3.32426794634504	0.000886509762427709	0.0102416232224203
gene:HORVU4Hr1G064710::chr4H:541531073-541536127	676.800882427754	-0.425019918759711	0.112985492751739	-3.76172115913678	0.000168748116640054	0.00273351147956378
gene:HORVU3Hr1G040350::chr3H:244048157-244055241	349.342095281972	-0.423470241766282	0.152654470217771	-2.77404416105324	0.00553641621755033	0.0414826364240698
gene:HORVU2Hr1G096100::chr2H:673051671-673057867	162.864591446551	-0.418719516516448	0.154964296380123	-2.7020386392059	0.00689157530537893	0.0486575763502006
gene:HORVU4Hr1G053670::chr4H:446640506-446643818	160.929483660431	-0.411879753633585	0.132786327838573	-3.10182351103424	0.00192332588314328	0.0185248969395193
gene:HORVU1Hr1G084160::chr1H:533100611-533105041	373.076741225545	-0.409732349328888	0.116378089241049	-3.52070009054905	0.000430409124003901	0.00576786631058382
gene:HORVU5Hr1G088970::chr5H:583135947-583141298	367.234083952894	-0.407619860542046	0.135164141469912	-3.01573964891261	0.00256353270273422	0.0232231468748848
gene:HORVU5Hr1G039850::chr5H:290716941-290720528	522.571321863254	-0.404402417291378	0.147639241279627	-2.7391255453924	0.00616028445589547	0.0448775173947604
gene:HORVU4Hr1G057170::chr4H:480836142-480839513	529.80599867381	-0.402025138704264	0.146186154952567	-2.75009038191551	0.00595788288718085	0.0438161754410159
gene:HORVU5Hr1G052710::chr5H:412980396-413274134	242.268666682651	-0.400908627324792	0.127471654736714	-3.14508059186057	0.00166041082460561	0.0166748755385609
gene:HORVU7Hr1G022970::chr7H:34432708-34435123	214.114364794304	-0.396269296924249	0.142052606289706	-2.78959539901778	0.00527739462434513	0.0400297616780234
gene:HORVU1Hr1G074590::chr1H:508562566-508569749	331.192976128228	-0.393904691190379	0.120946403717145	-3.25685327619657	0.00112654648070353	0.0122475523801822
gene:HORVU3Hr1G010780::chr3H:23642209-23646571	145.581009520547	-0.392121575271798	0.143360058608097	-2.73522192358849	0.00623382323043146	0.04524417233105
gene:HORVU1Hr1G002500::chr1H:5013432-5015690	408.816975658908	-0.390081485316534	0.134918545848379	-2.89123695236759	0.00383728678358578	0.0313940824559046
gene:HORVU4Hr1G004240::chr4H:9727735-9731305	1435.18960024119	-0.389448053897775	0.138094713540684	-2.82015179229175	0.00480009374978083	0.0371737647082474
gene:HORVU6Hr1G012690::chr6H:24995144-25100208	188.668064872083	-0.386523201747004	0.141696200743209	-2.72783038443978	0.0063752379798208	0.0460163933277419
gene:HORVU3Hr1G113060::chr3H:687526757-687543507	307.834555042914	-0.38614319893736	0.111460494354728	-3.46439517582293	0.000531425208235978	0.00683409567484384
gene:HORVU5Hr1G021580::chr5H:105659577-105665477	356.051873524635	-0.378190751175625	0.128643548658755	-2.93983456705497	0.00328387527405705	0.0280409890531058
gene:HORVU2Hr1G095990::chr2H:672581423-672602473	297.470871384988	-0.377258854290992	0.130624662604905	-2.88811352134988	0.00387559971636489	0.0315968823715736
gene:HORVU1Hr1G030790::chr1H:180448321-180457167	235.649466936405	-0.374330188974471	0.136752079871118	-2.7372906454312	0.00619475354705176	0.0450851118311908
gene:HORVU5Hr1G054080::chr5H:424851171-424855193	369.895593037723	-0.373647868988023	0.1326244022255	-2.81733876057525	0.00484234215277025	0.0373496280646175
gene:HORVU0Hr1G008700::chrUn:52288439-52293521	349.81551942055	-0.361748557222108	0.129504529821351	-2.79332744361245	0.00521688540937546	0.039685322944113
gene:HORVU3Hr1G034440::chr3H:186947108-186951309	406.197258879638	-0.348691526918852	0.113705646267425	-3.06661576065241	0.00216496959551593	0.0203945567720958
gene:HORVU4Hr1G087720::chr4H:638051326-638062018	759.647225011285	-0.3447312338243	0.124365449239036	-2.77192126859696	0.00557265131308382	0.041697710501388
gene:HORVU5Hr1G107510::chr5H:627188403-627192704	673.461582332516	-0.333368249534487	0.113671998785837	-2.93272092595616	0.00336005769323143	0.0285564159490234
gene:HORVU4Hr1G024710::chr4H:142633942-142655258	1581.85316023854	-0.322841621835501	0.119238380048103	-2.70753109615595	0.00677857201211868	0.0481020098301746
gene:HORVU3Hr1G079270::chr3H:582534471-582542774	498.412818013175	-0.31834661645715	0.0984081973621919	-3.2349603487347	0.00121659624684129	0.0129651052641079
gene:HORVU6Hr1G090810::chr6H:573629152-573635551	673.767757037839	-0.317370775968412	0.101514089788648	-3.12637168524267	0.00176977717207775	0.0174455390624035
gene:HORVU0Hr1G019950::chrUn:104765400-104767126	19793.7421850307	-0.317214970969055	0.101370559313158	-3.12926132713841	0.00175246375911411	0.0173317511755096
gene:HORVU4Hr1G077420::chr4H:604398113-604404689	514.212818836357	-0.316614523458964	0.115593410955757	-2.73903608208385	0.00616196103484607	0.0448775173947604
gene:HORVU5Hr1G051850::chr5H:404952205-404960508	795.917000789645	-0.302118389051371	0.100879270242149	-2.99485105637829	0.00274578884288896	0.0244113979748767
gene:HORVU2Hr1G051740::chr2H:304929472-304934714	942.027287315349	-0.284220669557541	0.0885279194281227	-3.2105201544729	0.00132494976856618	0.0138493966170196
gene:HORVU1Hr1G025060::chr1H:119684606-119903379	11364.8514469194	0.214047505262675	0.0734367400213842	2.91471959676241	0.00356008249213263	0.0298224280795142
gene:HORVU0Hr1G019930::chrUn:104750580-104753747	3034.07289667319	0.232253151433083	0.0793865391836775	2.92559864457268	0.00343794161351781	0.0290213368440048
gene:EPlHVUG00000039867::Mt:353157-360772	7195.7232749304	0.284882221137409	0.0815011684158526	3.4954372639644	0.000473285699503669	0.00623124929102326
gene:HORVU4Hr1G035450::chr4H:261915215-261957946	791.169886266384	0.289351234679198	0.101864089820075	2.84056172484618	0.00450341568607511	0.0353184700542392
gene:HORVU3Hr1G004590::chr3H:11825004-11829687	1399.65551436867	0.290752461728702	0.0880580728327274	3.30182631047362	0.00096057531889005	0.0108527977726933
gene:HORVU6Hr1G070560::chr6H:491265557-491279889	902.043557658781	0.296416111387348	0.10312087615238	2.8744529958157	0.00404728008350499	0.0326905781353788
gene:HORVU2Hr1G075970::chr2H:547564036-547569898	560.669586530617	0.311092144330819	0.105742972821408	2.941965182464	0.00326136593710373	0.0278867345236043
gene:HORVU1Hr1G057330::chr1H:418988418-419013290	309.048831228398	0.323659319737053	0.111763447997073	2.8959317696205	0.00378034583970478	0.031121590777027
gene:HORVU1Hr1G063590::chr1H:456208060-456212488	264.653413402834	0.338989772627326	0.122570158648632	2.76567947993849	0.00568043364809177	0.0422785125255849
gene:HORVU7Hr1G027000::chr7H:47582636-47592089	848.083606883309	0.34472866781771	0.107863016389851	3.19598579156874	0.00139353973995878	0.0144394276368079
gene:HORVU7Hr1G069230::chr7H:368769812-368773591	978.125444025802	0.346863719473978	0.0944826973886325	3.67118773130741	0.000241425921872692	0.00366779005295897
gene:HORVU1Hr1G007580::chr1H:15598791-15607504	175.929084571021	0.350263501153968	0.122177543198229	2.8668402718303	0.00414592201285675	0.0332845193746949
gene:HORVU0Hr1G011510::chrUn:65552327-65557511	2840.36724800456	0.355010738749407	0.118930720804697	2.98502133298587	0.00283558547422138	0.0250298153572539
gene:HORVU0Hr1G034150::chrUn:205583278-205586406	2983.74062239582	0.361554330721047	0.122155427272504	2.9597893339155	0.00307849474854636	0.026703147930254
gene:HORVU4Hr1G035250::chr4H:258977637-258985856	301.460630809759	0.366178727520861	0.112372863833175	3.25860456902191	0.00111961605971054	0.0121974338194165
gene:HORVU2Hr1G067320::chr2H:471553334-471570583	339.161779918351	0.369411078269013	0.133902619496308	2.7588039700687	0.00580133236144213	0.0429200613060106
gene:HORVU6Hr1G069920::chr6H:485188476-485213197	432.04136468631	0.371843247129822	0.0944443396271574	3.93716816272702	8.24488305758846e-05	0.00150352915150785
gene:HORVU4Hr1G027410::chr4H:168315018-168332126	642.581544332302	0.375179709378594	0.111909834433676	3.35251777716592	0.000800800984388619	0.009464666384348
gene:HORVU2Hr1G071240::chr2H:507108792-507117804	287.926432630486	0.377473693797594	0.139854207526817	2.69905139411135	0.00695374366373971	0.0489649746395818
gene:HORVU1Hr1G041150::chr1H:292351060-292366088	197.760095901892	0.38297460410233	0.133076509484372	2.8778527899945	0.00400391933623058	0.0324545813301987
gene:HORVU1Hr1G065770::chr1H:468807691-468811215	558.306785572132	0.388219457308032	0.138751956199661	2.79793862328969	0.00514298845197095	0.0392082941229663
gene:HORVU1Hr1G094870::chr1H:556670254-556685069	231.940899317719	0.388451865437542	0.134586720235009	2.8862570152482	0.00389853649954617	0.0317223794270347
gene:HORVU4Hr1G033990::chr4H:241546768-241568094	212.365649099759	0.389699172557416	0.123055323343287	3.16686155437806	0.0015409366024506	0.0157051541459653
gene:HORVU7Hr1G100370::chr7H:604693988-604701329	274.391753907861	0.392998202356607	0.128629668023605	3.05526872917442	0.00224858947445401	0.0210315134741414
gene:HORVU5Hr1G104860::chr5H:620189826-620199877	152.573405464136	0.395672382994751	0.147080880716161	2.69016870899982	0.00714159046303347	0.0499775018007961
gene:HORVU2Hr1G055380::chr2H:343609417-343633001	433.471050950818	0.399263800346136	0.127515800096506	3.13109277473039	0.00174157133340239	0.0172809244247846
gene:HORVU2Hr1G054040::chr2H:331408631-331432210	266.337282153064	0.399537013673077	0.141646169422351	2.82066938557135	0.00479235654456459	0.0371275197885096
gene:HORVU2Hr1G051690::chr2H:304347262-304358843	198.402122721795	0.400153630755821	0.145023955980307	2.75922435056287	0.00579387434588823	0.0428950711255795
gene:HORVU4Hr1G039410::chr4H:301481110-301519749	161.534118261101	0.404260312379779	0.14894767007908	2.71410967466055	0.00664541613071973	0.0474131386374323
gene:HORVU5Hr1G014340::chr5H:50952807-50955722	559.68001197846	0.41345502974418	0.127196200774041	3.25052971101446	0.00115190231596014	0.0124523897662611
gene:HORVU7Hr1G039850::chr7H:106400468-106420985	234.380575527154	0.420745944401772	0.150931278571126	2.78766567397424	0.00530893007628899	0.040168725060559
gene:HORVU2Hr1G063340::chr2H:427123984-427135456	203.663140125132	0.428163983479332	0.153122394476833	2.79622053287648	0.00517041060336252	0.0393765609046873
gene:HORVU2Hr1G116150::chr2H:737023591-737198790	134.974836421587	0.430593039126516	0.156742853306458	2.74713028404961	0.00601192476540974	0.0441210227286231
gene:HORVU5Hr1G092570::chr5H:588763004-588849797	661.691400611246	0.436525919829988	0.138461315072458	3.15269228521736	0.00161772238228753	0.0163216078742695
gene:HORVU3Hr1G049610::chr3H:350097930-350103029	467.991278860063	0.436726943075802	0.139514709392147	3.13032901676521	0.00174610614910735	0.0173158288729608
gene:HORVU1Hr1G035490::chr1H:235143810-235159986	159.462152626352	0.440280929398266	0.149816252422053	2.93880618611347	0.00329479038101294	0.0280925638893666
gene:HORVU5Hr1G050820::chr5H:396086817-396097982	182.489723099359	0.441252138524753	0.152107279787936	2.90092715575438	0.00372060357870155	0.0308232509242627
gene:HORVU5Hr1G056120::chr5H:438837083-438858408	196.128255375698	0.446166064441152	0.157134857961286	2.83938312752398	0.00452008496876662	0.0354227754578036
gene:HORVU4Hr1G020660::chr4H:102365959-102384721	170.055034206651	0.454727487003593	0.158200463160887	2.87437519409247	0.0040482773313341	0.0326905781353788
gene:HORVU1Hr1G024170::chr1H:108166410-108190963	324.853574985902	0.46269730381297	0.161749341295026	2.86058230660132	0.00422863772646103	0.0336912985360249
gene:HORVU2Hr1G059170::chr2H:391245020-391300772	293.990066068815	0.465719843215171	0.165473293219732	2.81447135155968	0.00488575322364296	0.0376017010542888
gene:HORVU4Hr1G043120::chr4H:342263590-342314170	254.1709713603	0.466469056788884	0.134689483850217	3.46329233325764	0.000533608314387135	0.00685375784142181
gene:HORVU3Hr1G109960::chr3H:679659658-679788703	237.588227758221	0.467245835175957	0.15279131256411	3.05806545761496	0.00222770909146026	0.0208454879203575
gene:ENSRNA049488557::chr7H:209878544-209880354	251.202225445086	0.47059924650742	0.162233578767556	2.90075118901053	0.00372269338154177	0.0308284171092152
gene:HORVU5Hr1G053470::chr5H:419738154-419751276	123.061603226514	0.471142263238248	0.159200285811992	2.95943101380261	0.00308207699195718	0.0267214801910197
gene:HORVU4Hr1G058250::chr4H:487084832-487105007	257.923292616766	0.47302181887419	0.149301443052104	3.16823340219901	0.00153368338811995	0.0156539936498107
gene:HORVU7Hr1G055620::chr7H:228824937-228832473	109.465383723781	0.474776537481096	0.168365199171759	2.81992086141714	0.00480354944840008	0.0371868301553977
gene:HORVU2Hr1G079820::chr2H:577111233-577120013	170.699729882374	0.47488476928842	0.168871143948522	2.81211317804055	0.00492171822322643	0.037844450923861
gene:HORVU1Hr1G000290::chr1H:968285-979886	444.013659686188	0.476871432953433	0.150667505633715	3.1650582582335	0.00155051902337847	0.0157722365677579
gene:HORVU1Hr1G064830::chr1H:463315308-463320049	204.124676109584	0.478002439104934	0.158546719852341	3.014899580074	0.0025706435153962	0.0232774980855817
gene:HORVU5Hr1G048300::chr5H:374500869-374509066	297.231636253134	0.478727293538649	0.17285389285884	2.76954881154803	0.00561339925399899	0.0419429043051111
gene:HORVU7Hr1G021510::chr7H:30840365-30849928	926.833331680906	0.480853726400578	0.107060789702196	4.491408364707	7.07537417555715e-06	0.000207774884658191
gene:HORVU1Hr1G079380::chr1H:522838187-522847799	529.699745196072	0.48156223874252	0.138727765524916	3.47127510430513	0.000517993023820501	0.00669411267292554
gene:HORVU2Hr1G068550::chr2H:482747345-482764546	143.179840458955	0.486076123227827	0.171693830214913	2.83106342621278	0.0046393520149935	0.0361955530490736
gene:EPlHVUG00000039872::Mt:161040-161146	886.683364233206	0.489517496370564	0.149791831703931	3.26798524860897	0.00108316010962186	0.011886495023439
gene:HORVU7Hr1G046410::chr7H:151124754-151133245	186.333732908225	0.494011361858249	0.173507869260474	2.84719859660444	0.00441058377203653	0.0348176278031702
gene:HORVU3Hr1G051850::chr3H:376208483-376237670	229.762520821519	0.494180279415846	0.162210424093621	3.04653836014033	0.00231492938812662	0.0215084866614009
gene:HORVU4Hr1G068170::chr4H:565254837-565290670	375.383473079024	0.49519587496673	0.117156587820398	4.22678642472814	2.37052470751048e-05	0.000552579296010148
gene:HORVU3Hr1G006250::chr3H:15255303-15258498	146.466860583242	0.497623466400636	0.168008780631364	2.96188963773564	0.00305757356664233	0.026576495168343
gene:HORVU3Hr1G079760::chr3H:585217581-585223902	130.217081365916	0.499075485635891	0.160622904099336	3.10712527851719	0.00188916320857326	0.018296428200581
gene:HORVU7Hr1G042410::chr7H:122921083-122932983	302.853535855958	0.500861925865797	0.17898992275006	2.79826885318675	0.00513773279253867	0.0392082941229663
gene:HORVU2Hr1G003340::chr2H:7266679-7273365	235.564852921038	0.504667675885373	0.132061713097653	3.82145334970929	0.000132667512337806	0.00225230532867927
gene:HORVU6Hr1G000660::chr6H:1692031-1692675	153.870277944406	0.504776305571024	0.16400421073592	3.07782527842419	0.00208517132238828	0.0197846625561985
gene:HORVU2Hr1G083720::chr2H:607173961-607182054	207.29262793427	0.506418134602356	0.148411309956172	3.41226106522414	0.000644263794296113	0.00796840619933533
gene:HORVU5Hr1G089950::chr5H:585698770-585711580	179.531125615828	0.507747479461282	0.167720900338788	3.02733576099137	0.00246719745223757	0.0224957908199251
gene:HORVU3Hr1G004580::chr3H:11822775-11824863	867.341605158118	0.507926824930093	0.120409495914787	4.21832863821263	2.46119916660599e-05	0.000570494291273386
gene:HORVU7Hr1G110760::chr7H:631295212-631309299	117.442921347007	0.508740117007589	0.177801771473814	2.8612769872347	0.00421938237621621	0.0336558170873756
gene:HORVU3Hr1G047160::chr3H:319229272-319270456	214.17826237223	0.508763425004754	0.152139610966511	3.34405630310664	0.000825629795891735	0.00965649687161765
gene:HORVU4Hr1G009390::chr4H:26675809-26687141	164.252532201664	0.511411167256819	0.149135165881366	3.42917892124541	0.000605410279718118	0.00759055249931613
gene:HORVU7Hr1G008690::chr7H:11307418-11313973	1034.13035618861	0.511710697447603	0.190021126019099	2.69291477304566	0.00708303724522086	0.0496923393787167
gene:HORVU1Hr1G076380::chr1H:514008169-514016820	275.643482853299	0.511724561281609	0.121790545672504	4.20167721932735	2.64944719915363e-05	0.000607494839797211
gene:HORVU7Hr1G103510::chr7H:613714239-613719279	225.300474564005	0.512844181506531	0.165793792928789	3.09326526914555	0.00197967092868643	0.0189719967851235
gene:HORVU4Hr1G056000::chr4H:470548613-470564232	134.873152876763	0.515081714805915	0.167033766697973	3.08369813474466	0.00204444922435633	0.0194729542349035
gene:HORVU5Hr1G047100::chr5H:366104457-366112005	150.354196646446	0.516368971325768	0.191207351040843	2.70057070774162	0.00692206214994603	0.048774557226798
gene:HORVU1Hr1G010930::chr1H:25940164-25954849	95.6479695553473	0.516650581691416	0.187065191196534	2.76187450154002	0.00574705643187094	0.0426084656334691
gene:HORVU6Hr1G073440::chr6H:508779430-508804289	219.612588360779	0.517231243600829	0.166382302608585	3.10869146232227	0.00187917845232383	0.0182333207838305
gene:HORVU5Hr1G074270::chr5H:542729431-542734648	132.302596714898	0.522521217261726	0.183912692986108	2.84113732868452	0.00449529499408097	0.0352757299482924
gene:HORVU2Hr1G123070::chr2H:754633334-754644513	136.468540309359	0.523048365695871	0.161021638442219	3.24831103916236	0.00116092289251724	0.0125305773809381
gene:HORVU2Hr1G086710::chr2H:624265707-624272799	181.498682239761	0.525882583675394	0.162087673892336	3.24443291119534	0.00117684736312187	0.0126569783411767
gene:HORVU6Hr1G030780::chr6H:129590068-129593798	115.350609440968	0.52665682894769	0.190891921463277	2.75892675242941	0.00579915317204003	0.0429190406882484
gene:HORVU4Hr1G052640::chr4H:437403341-437415391	141.093782609537	0.528550348533366	0.168763280605443	3.13190373307024	0.00173676812113956	0.0172414006209067
gene:HORVU1Hr1G071780::chr1H:494875113-494884223	154.674530811165	0.528610866716655	0.184382840959538	2.86692006677918	0.00414487685503263	0.0332845193746949
gene:HORVU6Hr1G048290::chr6H:291363017-291391529	110.431102441823	0.535484145684138	0.178438496266097	3.00094518217411	0.00269143012288405	0.0240399361783178
gene:HORVU0Hr1G039250::chrUn:248298173-248355667	231.597204198701	0.536839903884581	0.163355244173003	3.28633406660661	0.00101500555419376	0.0112858311911571
gene:HORVU3Hr1G066680::chr3H:506954270-507035362	93.8047307993301	0.539756896495122	0.196810166304444	2.74252548346602	0.00609687189073653	0.0445268594562787
gene:HORVU3Hr1G075220::chr3H:562266302-562282316	276.512047463306	0.541310519998937	0.126925604374252	4.26478583787422	2.00094035067826e-05	0.000484140066897136
gene:HORVU5Hr1G029110::chr5H:174741080-174753561	141.976867776834	0.542301353011063	0.164056536734021	3.30557601548225	0.000947813903189946	0.0107432534385293
gene:HORVU7Hr1G011890::chr7H:16666757-16674195	198.240060700953	0.543053077303329	0.171528898051899	3.16595677737649	0.00154573760114971	0.0157312094877898
gene:HORVU7Hr1G074850::chr7H:430314563-430320468	424.366746466071	0.543096911050094	0.155487127942073	3.49287377185606	0.000477852331890572	0.00627565467228681
gene:HORVU6Hr1G021150::chr6H:61736739-61742738	116.97560592427	0.544314410624599	0.189977759247931	2.86514807196057	0.00416814290360125	0.0333356305405553
gene:HORVU3Hr1G042500::chr3H:269929070-269963305	179.027965163453	0.544722032435025	0.169516550680806	3.21338553815149	0.00131180072753565	0.0137634341802218
gene:HORVU3Hr1G097580::chr3H:656335493-656341387	147.369552158672	0.545670386723913	0.183218319481078	2.97825232907602	0.0028989721600539	0.0254930107224146
gene:HORVU2Hr1G055870::chr2H:350042260-350075215	151.975006329463	0.546947657761847	0.189317890556933	2.8890436934029	0.00386415377388197	0.0315402551434946
gene:HORVU4Hr1G027150::chr4H:165268435-165272489	255.337959696758	0.547474683725677	0.197795378616746	2.76788410100562	0.00564215163405338	0.0420978993107191
gene:HORVU7Hr1G047980::chr7H:162957741-162969327	135.694304728488	0.547909422708616	0.173131775987259	3.16469590624969	0.00155245111139935	0.0157773875420898
gene:HORVU7Hr1G120510::chr7H:651648081-651658523	103.304504693308	0.548526559065674	0.176904510836071	3.10069289060677	0.00193068418885607	0.0185787486292392
gene:HORVU7Hr1G040110::chr7H:107769344-107773847	78.031235564159	0.549644161777459	0.187116388793209	2.93744532652828	0.00330928517548935	0.0281978624245493
gene:HORVU3Hr1G078900::chr3H:580703157-580708235	218.274274719586	0.550232549798238	0.154730179533354	3.55607775714904	0.000376432706996886	0.00518563317370838
gene:HORVU2Hr1G063740::chr2H:431241063-431250440	262.155272303403	0.55280644423419	0.174098273002978	3.17525518604504	0.00149704784472484	0.0153097898750898
gene:HORVU4Hr1G050840::chr4H:415121103-415159486	111.313691858901	0.553692181614821	0.17117283709577	3.23469652667517	0.00121772084527382	0.0129705159537626
gene:HORVU5Hr1G002030::chr5H:5685204-5702441	123.585059507384	0.555316524298652	0.182854247517357	3.03693532875653	0.00238996725941773	0.0219971573627032
gene:HORVU3Hr1G116150::chr3H:695340362-695354154	103.394122069932	0.555891336896544	0.165590979849499	3.35701459947745	0.000787889522033682	0.00934165096295876
gene:HORVU1Hr1G057660::chr1H:420574728-420581630	111.594087099154	0.558500237057365	0.170106884253982	3.28323124314876	0.00102624446344898	0.0113867103369279
gene:HORVU3Hr1G044530::chr3H:286946651-286996901	161.356935816583	0.559572370088927	0.14782261230407	3.78543148011679	0.000153442109903571	0.00253927573694545
gene:HORVU1Hr1G042560::chr1H:309265298-309284224	147.329423391568	0.56010295014173	0.158954429404535	3.52366997409227	0.000425614011560899	0.00572916786624805
gene:HORVU4Hr1G025130::chr4H:145356524-145364306	138.96250543976	0.560825462455239	0.199002139980142	2.81818809843553	0.00482955078511303	0.03728371649276
gene:HORVU4Hr1G037400::chr4H:279651594-279677280	97.8796407856286	0.561619802119726	0.207841629710519	2.70215260966702	0.00688921335532769	0.0486572388341014
gene:HORVU7Hr1G052560::chr7H:200952074-200970659	272.230885296308	0.562016953899241	0.136323609804489	4.12266778077008	3.74509642014321e-05	0.000804279447891087
gene:HORVU7Hr1G075370::chr7H:436443351-436454515	99.8231922178135	0.564988281350565	0.198415523143798	2.84750039915526	0.00440640389390447	0.0348043006285632
gene:HORVU6Hr1G042890::chr6H:241392274-241424824	344.455999185157	0.565293125052563	0.123288177521593	4.58513651849185	4.53689899881141e-06	0.000142803650223067
gene:HORVU7Hr1G047420::chr7H:159155958-159169545	120.858179234177	0.566419146890245	0.151457541912095	3.73978832443345	0.000184175284310687	0.00293591321297688
gene:HORVU5Hr1G047980::chr5H:372318232-372321492	162.879152760914	0.566823454517658	0.202061828662055	2.80519808353146	0.0050285666285677	0.038521773919583
gene:HORVU7Hr1G066170::chr7H:333730512-333781184	157.087517753125	0.567148188999146	0.188400864500977	3.01032689261468	0.00260966657736435	0.0235598323124358
gene:HORVU4Hr1G082910::chr4H:623330387-623363836	256.670160153435	0.568591830544906	0.175244633053892	3.24456059302	0.00117631987530451	0.0126569783411767
gene:HORVU4Hr1G077850::chr4H:605649504-605668683	108.958294823129	0.569639818913873	0.196027522573536	2.90591755400154	0.00366177918273287	0.0304696742124965
gene:HORVU7Hr1G044850::chr7H:140679400-140685382	81.9798620668114	0.571044305493688	0.211421008932926	2.70098183891864	0.00691351135049636	0.0487469784223798
gene:HORVU5Hr1G050720::chr5H:395154219-395188548	133.697881232819	0.571449218256254	0.163226353185144	3.50096174487261	0.000463582384114432	0.00614521968055463
gene:AGP50779::Pt:67704-68355	194.043099203428	0.571985940523815	0.204827527491077	2.79252475255667	0.00522984661402101	0.0397264287956668
gene:HORVU3Hr1G019790::chr3H:57786135-57791992	892.80506532444	0.572405803708098	0.188395993720854	3.03831197470276	0.00237907517943272	0.0219396643520843
gene:HORVU2Hr1G071710::chr2H:511663363-511674599	67.0552776253584	0.574888829291457	0.203983977471851	2.81830385119729	0.004827809871542	0.03728371649276
gene:HORVU4Hr1G006320::chr4H:14989753-14997604	86.4935148984161	0.574926585613143	0.19029899419954	3.02117511462146	0.00251795691374616	0.0229089407479129
gene:HORVU2Hr1G017490::chr2H:42963467-42967282	121.278186158064	0.575619861483687	0.185480418641017	3.10339962407436	0.00191311118921897	0.0184434093830895
gene:HORVU6Hr1G040310::chr6H:216425458-216431780	230.454610934966	0.576232377217171	0.139889606259819	4.11919364578758	3.8020053745678e-05	0.000813234638918236
gene:HORVU6Hr1G024100::chr6H:83656231-83666923	389.310169010164	0.57698251574636	0.164263197418246	3.51254891427232	0.00044383029913395	0.00592130448578073
gene:HORVU3Hr1G050400::chr3H:361773175-361781119	72.6335092822639	0.577247765693635	0.206443826842636	2.79614931830172	0.00517155009368724	0.0393765609046873
gene:HORVU4Hr1G035290::chr4H:259595182-259615843	139.897797013233	0.577269661744092	0.152040507212676	3.79681489049888	0.000146567150836091	0.00244000072326179
gene:HORVU2Hr1G107550::chr2H:712173524-712180356	448.819819053775	0.577706111529954	0.113891226617565	5.07243734822375	3.92752462392898e-07	1.7312396801411e-05
gene:HORVU3Hr1G015570::chr3H:36651147-36659153	148.865850521813	0.578419605911495	0.152173453301046	3.8010546081727	0.000144081540960604	0.00240815459478352
gene:HORVU4Hr1G054060::chr4H:450149252-450159323	145.241523245713	0.580538336338531	0.186720236443564	3.10913453943701	0.0018763625506421	0.0182333207838305
gene:HORVU7Hr1G041920::chr7H:117696037-117704021	638.919646932659	0.581072898960856	0.175622259170789	3.30865177173113	0.000937463582577731	0.0106546536687997
gene:HORVU5Hr1G039100::chr5H:283359540-283405200	165.307335569559	0.582276193542946	0.215213183600207	2.70557864440414	0.00681855008754788	0.0482879198857466
gene:HORVU3Hr1G014250::chr3H:32606086-32616817	172.432203360186	0.585365416719807	0.195210075313552	2.99864346540298	0.00271184447046118	0.0241504624463858
gene:HORVU1Hr1G022550::chr1H:96388026-96393952	130.479562370152	0.585394750309208	0.160179352043013	3.65462054155403	0.000257562631633211	0.00385995145596571
gene:HORVU5Hr1G092960::chr5H:589900675-589905713	135.688351614625	0.586497025177301	0.160513443145896	3.65388103128668	0.000258305989789275	0.00386833457358211
gene:HORVU3Hr1G032920::chr3H:171003939-171008254	98.5600783248116	0.586527634640926	0.194254266101487	3.01938097119833	0.00253291800618542	0.0230151832316572
gene:HORVU4Hr1G029030::chr4H:182786275-182792652	233.238068259448	0.590899826893787	0.167609486702734	3.52545573951781	0.000422754814288503	0.00569432589700837
gene:HORVU5Hr1G049980::chr5H:388208850-388241226	104.363676902041	0.592448594148218	0.212526714991002	2.78764292843514	0.00530930279526408	0.040168725060559
gene:HORVU7Hr1G072940::chr7H:410009634-410017223	66.5457265001496	0.592910513950936	0.213064578104813	2.78277374505331	0.00538963769166074	0.040588295882829
gene:HORVU1Hr1G031310::chr1H:187491534-187537517	173.843723850026	0.594107095365224	0.19352177717381	3.06997540039967	0.00214076402607072	0.0202299795110844
gene:HORVU4Hr1G024790::chr4H:143301475-143324612	166.194551751181	0.594333746717206	0.175594321204196	3.38469799388366	0.000712566075590849	0.00862545440723846
gene:HORVU3Hr1G002540::chr3H:6521401-6531496	240.499538949235	0.596913870871819	0.164339691389485	3.63219539859748	0.000281020197113437	0.0040900590547592
gene:HORVU1Hr1G054300::chr1H:401523258-401545124	432.774705146035	0.597833889367173	0.153253516961554	3.9009472749467	9.58170197458224e-05	0.00170588370632994
gene:HORVU2Hr1G083610::chr2H:606421116-606425491	485.070824715443	0.597858155299028	0.111119461319524	5.38031905662221	7.43539406203581e-08	4.05017086912862e-06
gene:HORVU5Hr1G119810::chr5H:656651811-656654121	314.113572155476	0.59909020829627	0.211650520784355	2.83056335546023	0.00464661075373788	0.0362253013378171
gene:HORVU3Hr1G062620::chr3H:477765259-477771440	84.5323543157334	0.599802362696941	0.212845034710853	2.81802374911758	0.00483202356333925	0.03728371649276
gene:HORVU5Hr1G012110::chr5H:33869586-33877952	112.567244484576	0.60063878146502	0.220554260946766	2.72331524626493	0.00646303535380725	0.0464428507686778
gene:HORVU6Hr1G059300::chr6H:391873554-391910007	187.51663201846	0.601746190301517	0.163473180653588	3.68100863943342	0.000232313132283495	0.00357062567207074
gene:HORVU6Hr1G045970::chr6H:267733724-267836428	141.147400521246	0.60446193771625	0.196022782334517	3.08363104797035	0.00204491025162499	0.0194729542349035
gene:HORVU5Hr1G061200::chr5H:479107585-479123448	124.388022752599	0.608032205751076	0.177826707279543	3.41924008520977	0.00062796293078298	0.00780445474349158
gene:HORVU6Hr1G010050::chr6H:17851140-17927010	110.833719711038	0.608428125087387	0.18460042966477	3.29591933340718	0.000981001787735025	0.0110008232474222
gene:HORVU1Hr1G071580::chr1H:493984035-493991270	194.995044113474	0.610806693932874	0.211235855095303	2.89158624920611	0.00383302366794912	0.0313836275865647
gene:HORVU1Hr1G033740::chr1H:216629338-216653976	181.150917905606	0.611866127348086	0.150141317520682	4.07526813705894	4.59613570473849e-05	0.000946506849440073
gene:HORVU3Hr1G089330::chr3H:628115641-628125025	159.140745162082	0.613702045215704	0.171972855665313	3.56859832815748	0.000358896160212913	0.00500739924660697
gene:HORVU5Hr1G117770::chr5H:651204151-651218394	160.735338197261	0.614104726149471	0.225918162049662	2.71826187225477	0.00656258750981932	0.0469496308205039
gene:HORVU1Hr1G018750::chr1H:69966804-69971732	154.89083624977	0.616393650576285	0.210392709951502	2.92972912758418	0.00339257593925251	0.0287862395878625
gene:HORVU1Hr1G046870::chr1H:344583892-344588775	198.627244399915	0.616759198403391	0.197879363262137	3.11684446642549	0.00182797984897031	0.017918463545198
gene:HORVU5Hr1G104700::chr5H:619890137-619895338	294.994933829497	0.618327878651418	0.169350617616325	3.65116990628449	0.00026104846324564	0.00389276949517931
gene:HORVU4Hr1G073930::chr4H:592215291-592220099	81.6087451635257	0.618828145476542	0.202760184352601	3.05202003762432	0.00227306926477557	0.0212132953223129
gene:HORVU6Hr1G052520::chr6H:323780723-323786310	63.7820268337356	0.618910212900289	0.216573144975308	2.85774218669102	0.00426666897815188	0.0339428611179044
gene:HORVU2Hr1G098020::chr2H:681757211-681787878	322.839424312544	0.61942593781548	0.175429530794252	3.53091030347654	0.000414132158930057	0.00560931298319461
gene:HORVU3Hr1G055000::chr3H:409453237-409458169	176.377724300552	0.619485264519466	0.162058210224129	3.8226095651847	0.000132046773847431	0.00224447491262416
gene:HORVU5Hr1G038790::chr5H:278860734-278863948	81.4813134148093	0.61967642412336	0.21461474958337	2.88738973125721	0.00388452738690454	0.0316573925725019
gene:HORVU6Hr1G069260::chr6H:479720875-479727734	145.58080576648	0.620078520419554	0.206396081641048	3.00431343216078	0.0026618095350331	0.0238564395923299
gene:HORVU5Hr1G027250::chr5H:156327100-156370603	162.85518013882	0.621244760513236	0.167430145205133	3.71047137152091	0.00020687369144481	0.00323399720172384
gene:HORVU7Hr1G058360::chr7H:258860421-258866854	167.96771041394	0.622410364903903	0.22229739255784	2.79989952982447	0.00511185141821573	0.0390558822381555
gene:HORVU6Hr1G064590::chr6H:438913475-438915776	841.281210012751	0.622451569293829	0.107475992373315	5.79154056221001	6.97437102031175e-09	4.98786139704336e-07
gene:HORVU6Hr1G026730::chr6H:103063438-103069387	108.896226430062	0.62388830974607	0.219365466250147	2.84405891415305	0.00445428110193512	0.0350639140581385
gene:HORVU7Hr1G041850::chr7H:117624011-117638938	555.852117320337	0.62542644697518	0.18343193235336	3.40958326585345	0.000650622134829066	0.00802233218982562
gene:HORVU0Hr1G016050::chrUn:86613414-86654874	144.854988511887	0.626214103440748	0.2288642503236	2.73618139379706	0.00621567526640744	0.0451560872560578
gene:HORVU6Hr1G025670::chr6H:93642157-93667797	110.128153457276	0.62630877097923	0.194846540163131	3.21436947484347	0.00130731335985196	0.0137300552968269
gene:HORVU1Hr1G008120::chr1H:17566210-17571933	687.968362233719	0.626472042635595	0.191478962753566	3.27175389727731	0.00106882570387685	0.0117475845529089
gene:HORVU5Hr1G055840::chr5H:437707447-437711835	154.181430597203	0.626997530066325	0.166842835446174	3.75801291310831	0.000171268044778575	0.0027653588298911
gene:HORVU6Hr1G067130::chr6H:465301369-465305652	105.794198608704	0.63016265550211	0.229502187818134	2.74578060232469	0.00603671189319715	0.0442411656557557
gene:HORVU2Hr1G064170::chr2H:435107464-435112506	409.947950628815	0.634714021753734	0.188261048746183	3.37145695289027	0.000747717229513696	0.00897346031264553
gene:HORVU2Hr1G086140::chr2H:621114388-621117467	12110.5536967812	0.636585295571126	0.12218937908419	5.20982511198873	1.89018718174001e-07	9.22113124901751e-06
gene:HORVU6Hr1G037500::chr6H:187971792-187979293	285.196286399197	0.636957846544745	0.149053187939055	4.27335943197126	1.92549690493682e-05	0.000470761603758157
gene:HORVU5Hr1G033960::chr5H:228501866-228576662	125.982991026726	0.637372091316946	0.219686288683106	2.90128298464883	0.00371638096898118	0.0308074700657013
gene:HORVU3Hr1G064850::chr3H:495132645-495152193	111.419856525747	0.637933676788884	0.230702822562232	2.76517499744417	0.00568922657775964	0.0423125610009264
gene:HORVU6Hr1G069390::chr6H:481011323-481016550	111.031834354202	0.640123598633791	0.168048984930502	3.80914885560612	0.000139445991480192	0.00234184617960265
gene:HORVU4Hr1G042800::chr4H:339944251-340005832	203.669572834803	0.640246928038327	0.129816349358617	4.93194371280345	8.14153799162007e-07	3.22988637380761e-05
gene:HORVU4Hr1G083030::chr4H:623512882-623514786	577.006916001318	0.644336209442701	0.176559903788279	3.64939148480367	0.000262862250626467	0.00390855680745391
gene:HORVU4Hr1G083970::chr4H:627011902-627020858	95.1092995048662	0.644746871286577	0.238005746017993	2.70895506547071	0.00674954803071316	0.0479559288647105
[truncated: 1,006 more rows]
