# Supplementary figures and images for: Excess nitrogen responsive HvMADS27 transcription factor controls barley root architecture by regulating abscisic acid level
Source: Frontiers journal article supplement (doi:10.3389/fpls.2022.950796), 2022-09-12

A

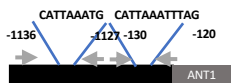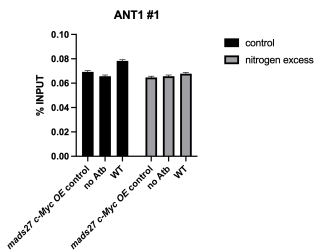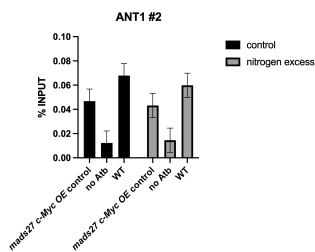

B

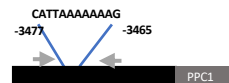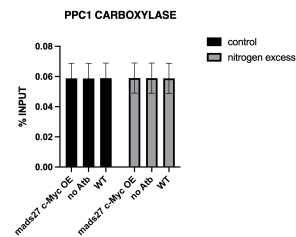

C

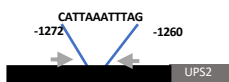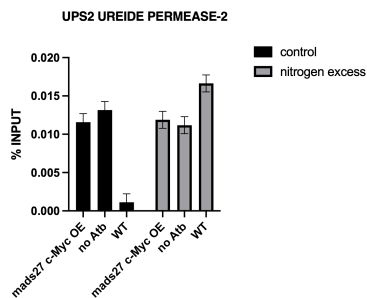

D

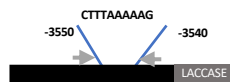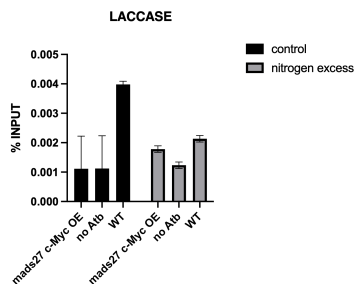

E

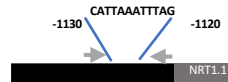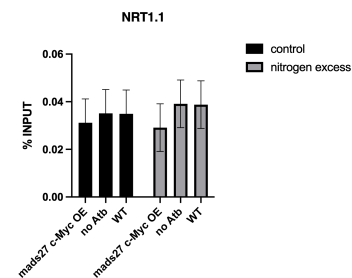

Supplement: Data_Sheet_1.ZIP [file Data_Sheet_1.ZIP]

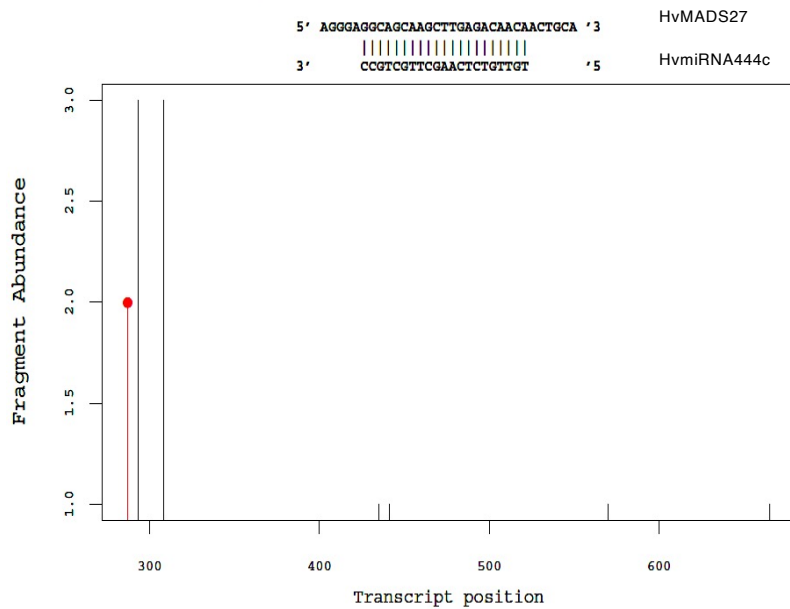

Supplement: Data_Sheet_1.ZIP [file Data_Sheet_1.ZIP]

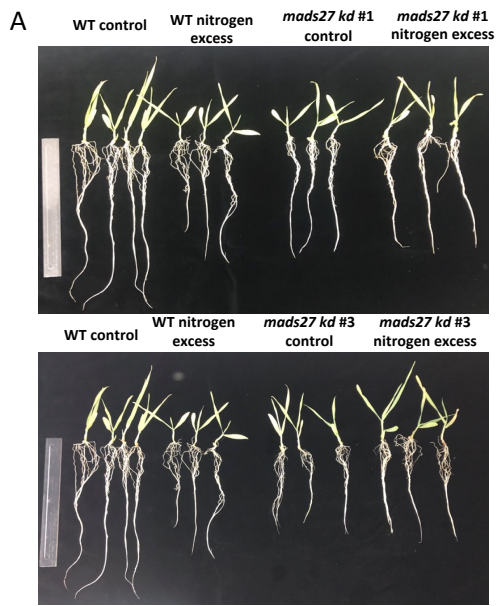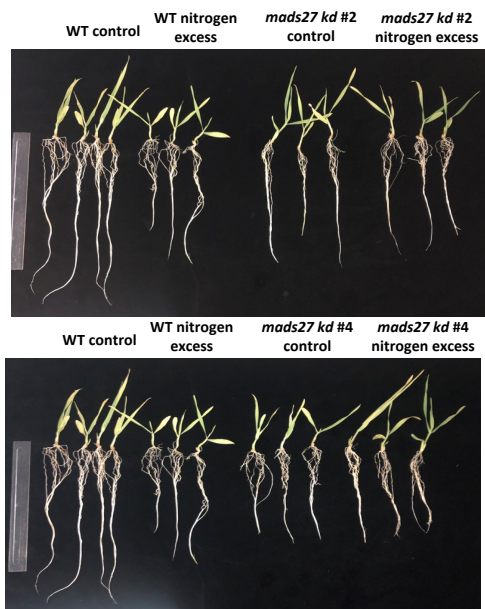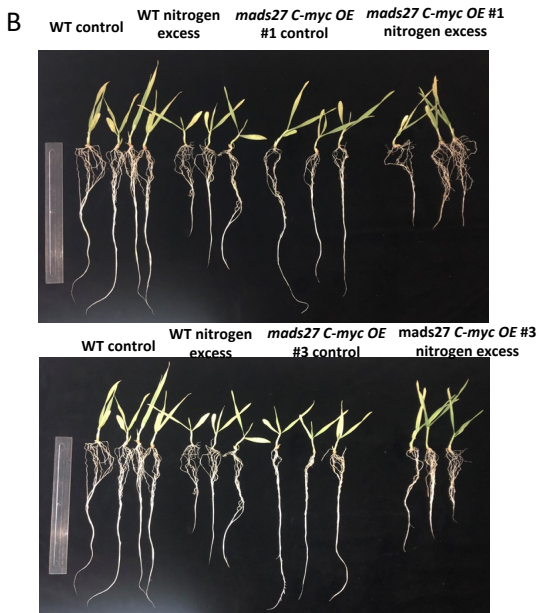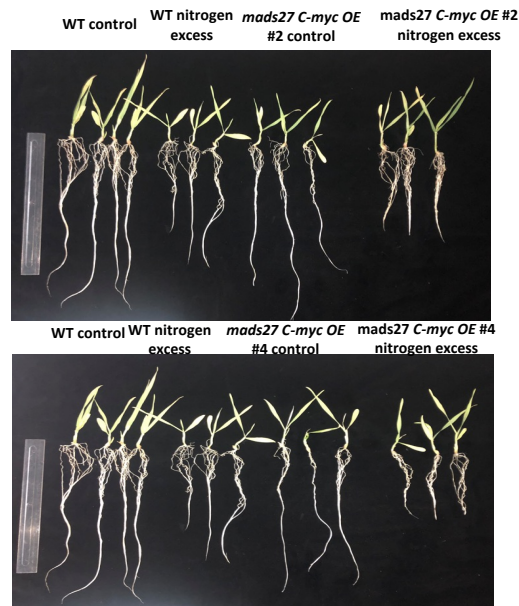

Supplement: Data_Sheet_1.ZIP [file Data_Sheet_1.ZIP]

A

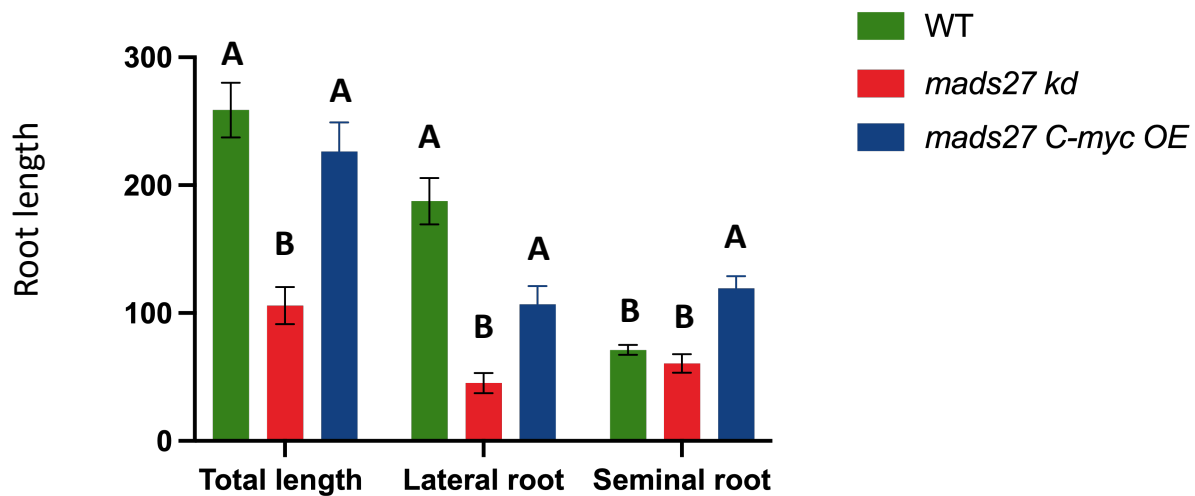

B

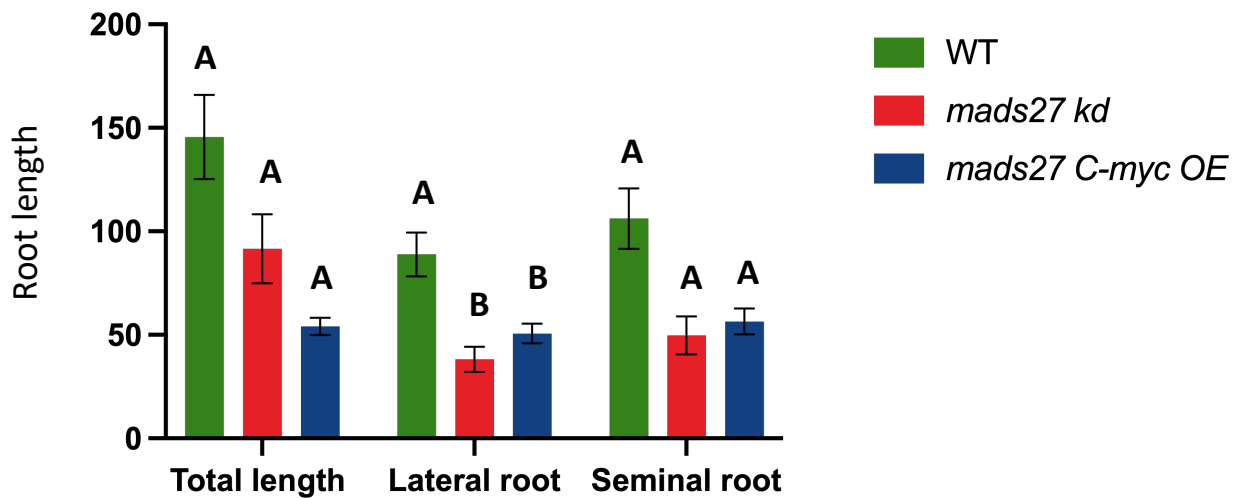

Supplement: Data_Sheet_1.ZIP [file Data_Sheet_1.ZIP]

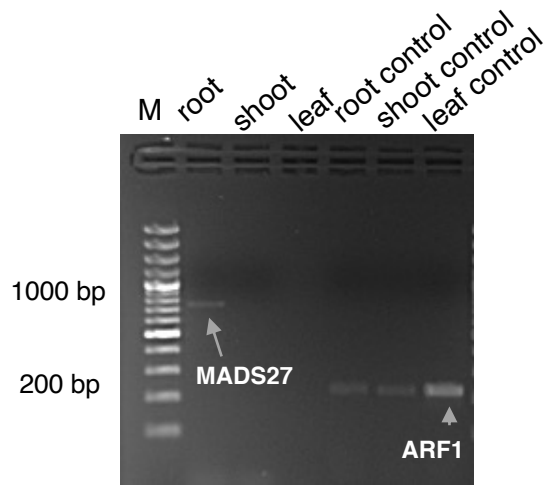

Supplement: Data_Sheet_1.ZIP [file Data_Sheet_1.ZIP]

A

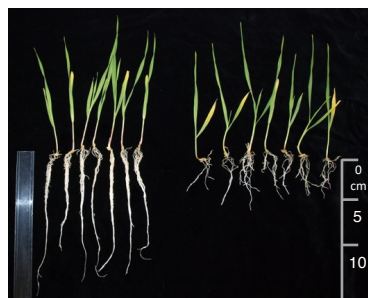

WT  
control

WT nitrogen  
excess

B

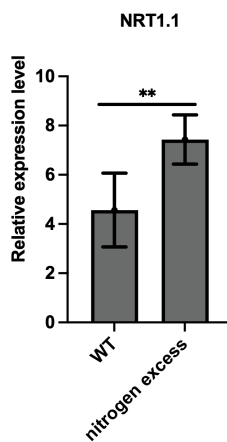

C

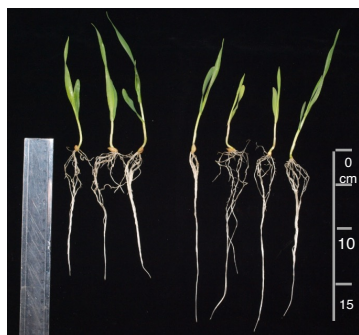

WT  
control

WT nitrogen  
deprivation

D

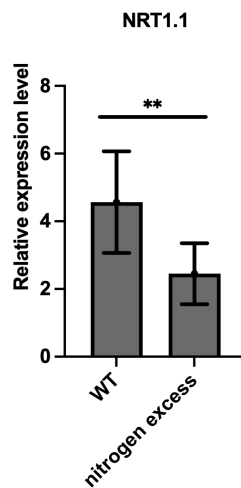

E

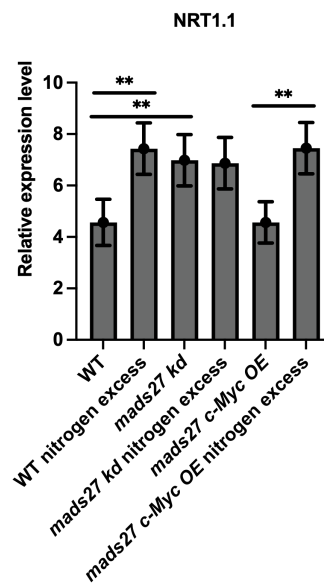

Supplement: Data_Sheet_1.ZIP [file Data_Sheet_1.ZIP]

A

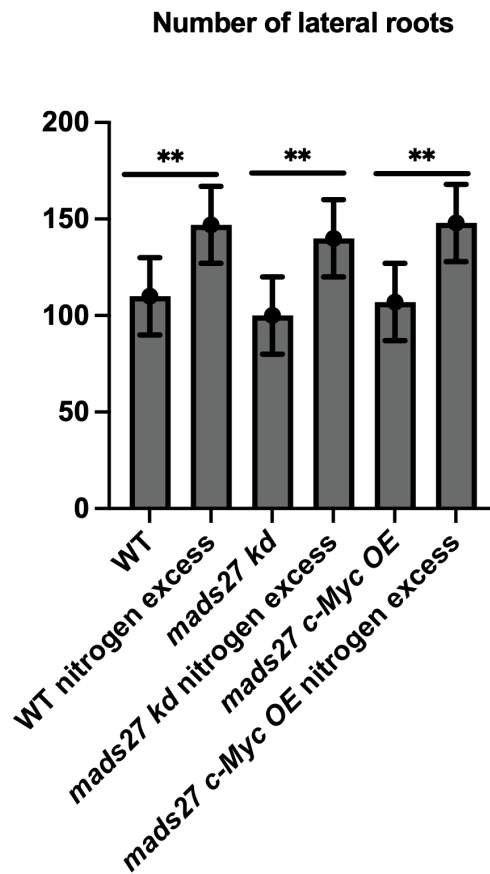

Supplement: Data_Sheet_1.ZIP [file Data_Sheet_1.ZIP]

A

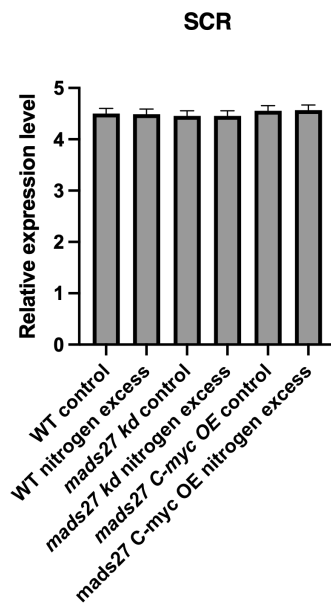

B

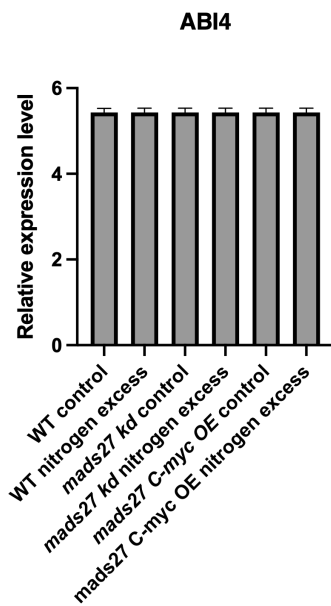

Supplement: Data_Sheet_1.ZIP [file Data_Sheet_1.ZIP]

## WT control vs excess N stress

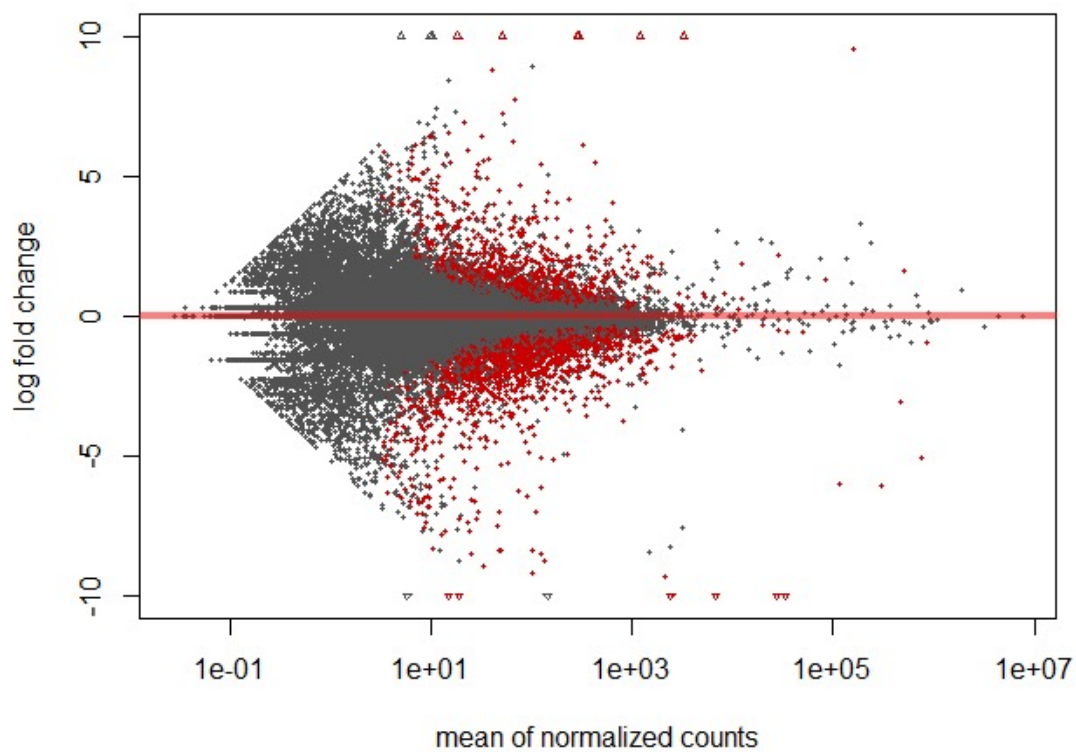

Supplement: Data_Sheet_1.ZIP [file Data_Sheet_1.ZIP]

A

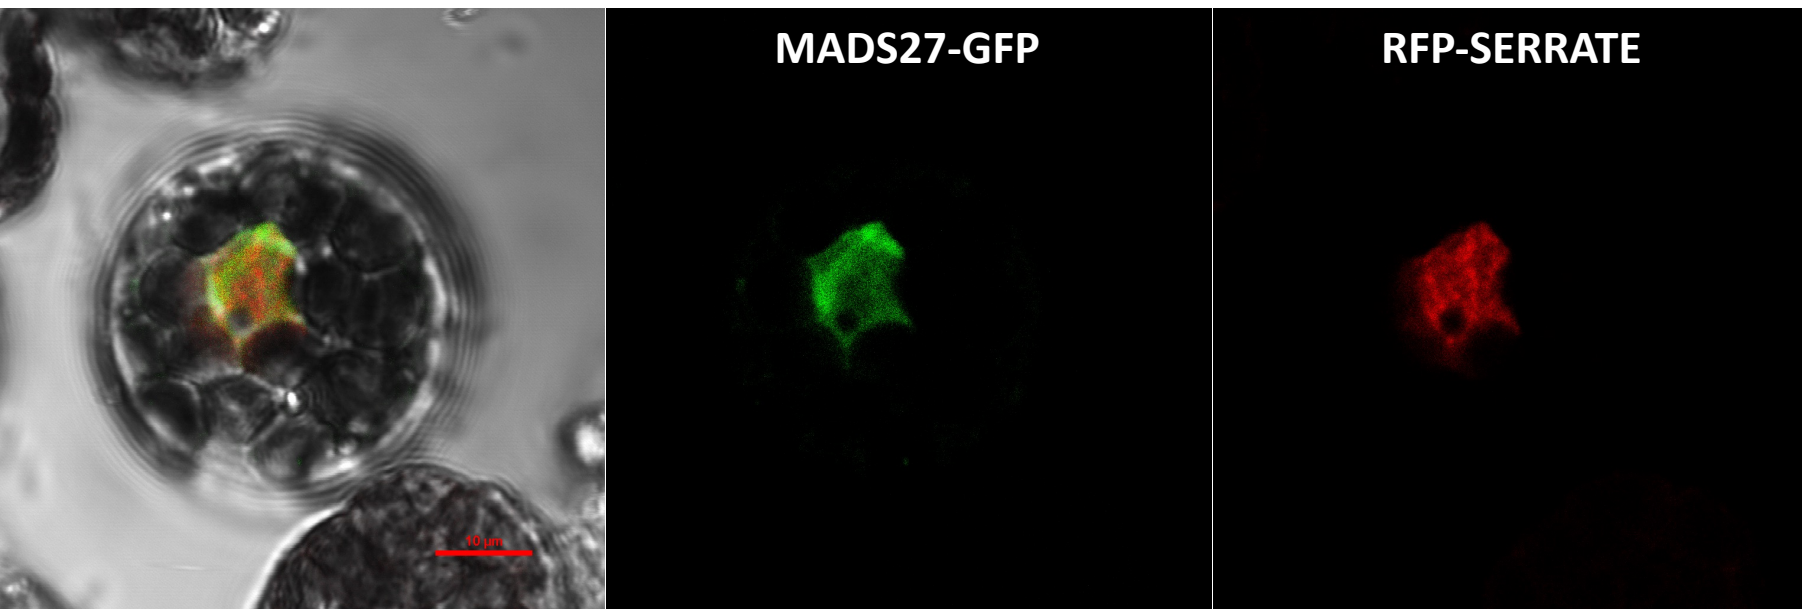

B

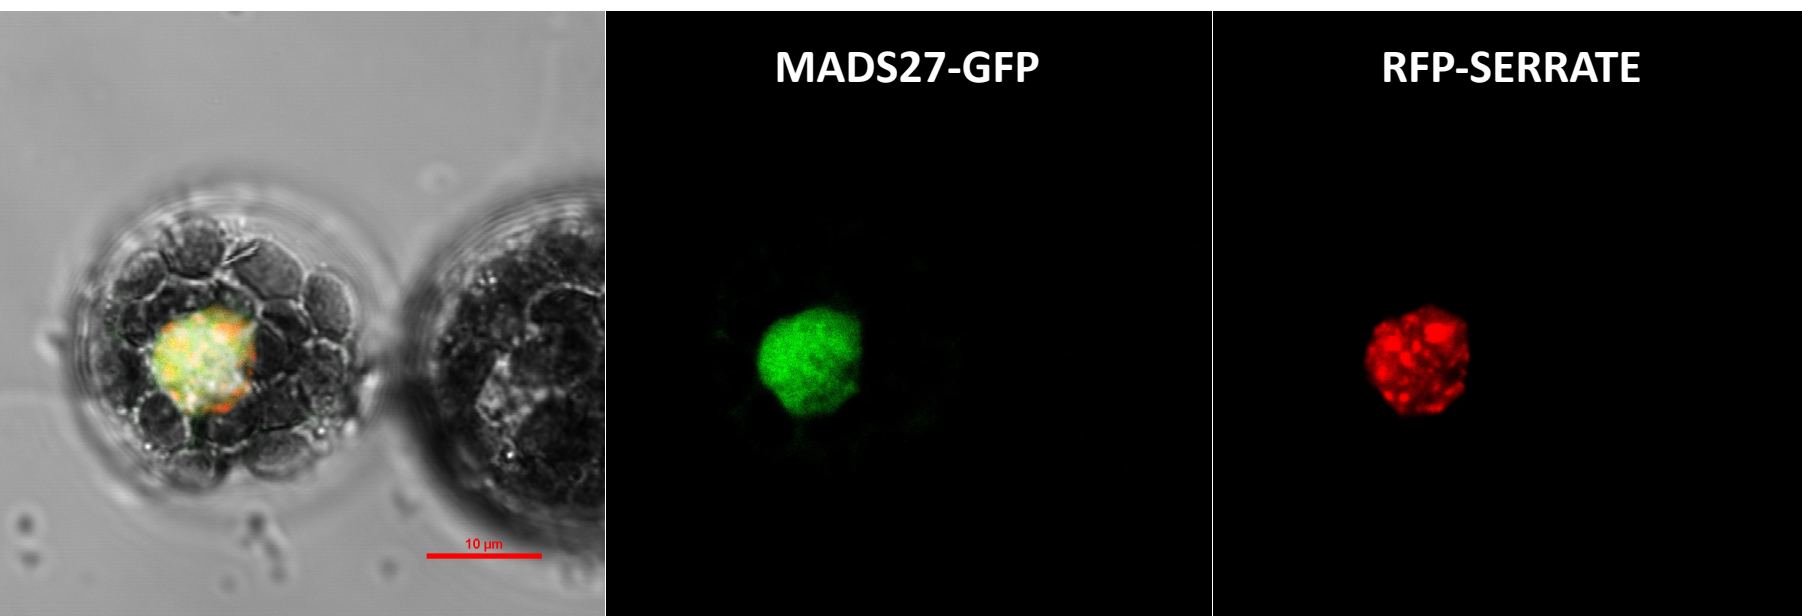

Supplement: Data_Sheet_1.ZIP [file Data_Sheet_1.ZIP]
